# Supplementary material
Source: PubMed Central journal article supplement (PMC5350695)
Supplement: CTS-3-158-s003.pdf [file CTS-3-158-s003.pdf]

Values represent mast cell genes upregulated by at least 10% by FcεRI stimulation that were inhibited >20% by Inos (sorted most inhibited to least inhibited in column D)

| Gene_symbol         | % Increase (-) to (+) | % Inhibition by Inositol |
|---------------------|-----------------------|--------------------------|
| LECT1               | 10245%                | 99.08%                   |
| PTBP2               | 1538.29%              | 98.69%                   |
| ABCG5               | 4480.00%              | 97.39%                   |
| NIT1                | 1913.64%              | 95.15%                   |
| VILL                | 84.13%                | 88.13%                   |
| MARVELD3            | 270.87%               | 84.86%                   |
| CFHR5               | 34.99%                | 76.92%                   |
| MIER3               | 213.03%               | 72.22%                   |
| IDH3B               | 40.70%                | 69.26%                   |
| LMX1B               | 35.18%                | 67.49%                   |
| XYLT2               | 38.93%                | 65.09%                   |
| ANTXRL              | 43.68%                | 64.64%                   |
| KYNU                | 74.87%                | 64.52%                   |
| FAM22               | 29.86%                | 62.28%                   |
| C12orf52            | 36.53%                | 62.04%                   |
| CA7                 | 42.42%                | 60.63%                   |
| CHST1               | 33.91%                | 59.95%                   |
| C20orf144,C20orf134 | 66.44%                | 59.92%                   |
| MBLAC1              | 359.97%               | 59.87%                   |
| CDCA3               | 83.10%                | 59.76%                   |
| OTUB1               | 62.69%                | 59.22%                   |
| EIF1AD              | 30.98%                | 58.92%                   |
| GNB2                | 29.14%                | 58.46%                   |
| EIF6                | 17.89%                | 58.35%                   |
| RP5-98107.3         | 473.55%               | 58.35%                   |
| VASH1               | 97.42%                | 58.22%                   |
| RAD51L1             | 92.07%                | 58.17%                   |
| C3orf62             | 41.37%                | 58.07%                   |
| SEPN1               | 20.10%                | 57.79%                   |
| PHLDA1              | 35.31%                | 57.77%                   |
| ADAD2               | 14.51%                | 57.47%                   |
| SMOC2               | 18.70%                | 57.19%                   |
| AC098823.3          | 67.54%                | 57.10%                   |
| RP11-318K12.3       | 10.62%                | 56.91%                   |
| ASTN1               | 45.29%                | 56.41%                   |
| PARP15              | 27.69%                | 55.63%                   |
| RP11-191L9.4        | 29.43%                | 55.51%                   |
| ANKRD39,ANKRD23     | 61.60%                | 55.38%                   |
| POU3F3              | 73.70%                | 55.28%                   |
| FAT3                | 68.38%                | 55.27%                   |
| C20orf102           | 20.76%                | 55.27%                   |
| FGL2                | 6499.13%              | 54.84%                   |
| RHO                 | 92.42%                | 54.78%                   |
| NOG                 | 78.26%                | 54.62%                   |

|                             |         |        |
|-----------------------------|---------|--------|
| PLA2G16                     | 34.38%  | 54.56% |
| GNG4                        | 62.55%  | 54.53% |
| RP13-143G15.3               | 78.91%  | 54.53% |
| FAM177B                     | 41.68%  | 54.29% |
| EFHD1                       | 19.83%  | 53.96% |
| TCF4                        | 67.42%  | 53.95% |
| AC092296.2-1                | 48.21%  | 53.85% |
| GPRC5C                      | 34.63%  | 53.85% |
| IFI6                        | 55.53%  | 53.77% |
| AC146944.1-4,AC146944.1-5,) | 25.81%  | 53.64% |
| TMEM161A                    | 33.21%  | 53.48% |
| EIF2B5,FAM131A              | 165.68% | 53.47% |
| C9orf110                    | 64.61%  | 53.00% |
| MAFA                        | 31.22%  | 52.94% |
| RIPPLY1                     | 16.62%  | 52.85% |
| FGF22                       | 18.24%  | 52.73% |
| AC006158.8                  | 50.22%  | 52.71% |
| TRAF6                       | 204.92% | 52.67% |
| MYBPC2,SPIB                 | 10.13%  | 52.27% |
| AC116353.7                  | 20.07%  | 52.24% |
| AC135457.2-3                | 54.47%  | 52.22% |
| KREMEN1                     | 25.36%  | 51.87% |
| PLAGL1                      | 330.46% | 51.77% |
| EIF4EBP2                    | 99.24%  | 51.72% |
| CPB1                        | 45.44%  | 51.71% |
| TNFRSF14                    | 67.26%  | 51.70% |
| C7orf47                     | 32.34%  | 51.68% |
| CYP27C1                     | 135.47% | 51.64% |
| COQ7                        | 38.84%  | 51.60% |
| AJAP1                       | 39.30%  | 51.52% |
| GFRA4                       | 32.56%  | 51.50% |
| AC073479.1                  | 186.02% | 51.41% |
| DPM3                        | 10.38%  | 51.28% |
| LSS,AP001468.1              | 16.76%  | 50.97% |
| AC138028.1-3                | 37.18%  | 50.78% |
| OR1J2                       | 64.87%  | 50.75% |
| ATP1A4                      | 51.41%  | 50.65% |
| PAPPA                       | 359.84% | 50.63% |
| MAF                         | 16.55%  | 50.46% |
| AMPD2                       | 67.64%  | 50.45% |
| LRRC51                      | 140.25% | 50.37% |
| NKG7                        | 40.70%  | 50.36% |
| USE1                        | 24.11%  | 50.24% |
| TNRC6B                      | 21.65%  | 50.24% |
| CALML3                      | 27.07%  | 50.18% |
| ABCB11                      | 32.38%  | 50.12% |
| ETS1                        | 25.62%  | 50.10% |

|                 |         |        |
|-----------------|---------|--------|
| AIRE            | 16.72%  | 49.96% |
| C21orf32        | 41.64%  | 49.76% |
| SEMA6B          | 13.67%  | 49.75% |
| CD74            | 142.80% | 49.66% |
| TMPRSS5         | 12.81%  | 49.49% |
| TPRXL           | 71.05%  | 49.45% |
| SRP_euk_arch    | 45.86%  | 49.23% |
| ZNF33A          | 68.67%  | 49.22% |
| FAM89B          | 32.49%  | 48.99% |
| ETV4            | 16.32%  | 48.97% |
| MYL2            | 22.55%  | 48.94% |
| C17orf56        | 11.78%  | 48.86% |
| SAE1            | 50.38%  | 48.68% |
| C8orf8          | 41.68%  | 48.59% |
| RXRG            | 40.39%  | 48.55% |
| GDPD5           | 35.31%  | 48.54% |
| RNF8            | 25.52%  | 48.44% |
| NUBP2           | 20.93%  | 48.35% |
| FAM168A         | 62.99%  | 48.11% |
| PPP2R2D         | 30.02%  | 47.86% |
| C7orf65         | 62.10%  | 47.73% |
| VIPR2           | 22.44%  | 47.58% |
| PCDH9           | 50.72%  | 47.55% |
| CDH10           | 16.23%  | 47.53% |
| MARCH11         | 33.01%  | 47.46% |
| CCDC104         | 46.24%  | 47.43% |
| SLC6A9          | 30.51%  | 47.40% |
| SBNO2           | 31.31%  | 47.23% |
| MIDN            | 49.82%  | 47.20% |
| MRPL43          | 56.39%  | 47.17% |
| HS6ST1          | 94.07%  | 47.16% |
| ABTB1           | 14.31%  | 47.05% |
| CYCS            | 242.16% | 46.89% |
| C5orf50         | 35.47%  | 46.82% |
| RP3-487J7.2     | 15.55%  | 46.74% |
| NEURL1B         | 32.06%  | 46.69% |
| C15orf26        | 51.30%  | 46.67% |
| SULT1A4,SULT1A3 | 23.58%  | 46.48% |
| CECR6           | 25.49%  | 46.47% |
| RPL10           | 36.69%  | 46.30% |
| STAU1           | 62.34%  | 46.29% |
| PPAPDC1A        | 41.20%  | 46.23% |
| AGXT2L2         | 15.41%  | 46.09% |
| AC008060.7      | 39.19%  | 46.06% |
| KRTAP19-6       | 55.04%  | 46.05% |
| PRKCB           | 79.03%  | 45.90% |
| CLU             | 39.90%  | 45.80% |

|                               |          |        |
|-------------------------------|----------|--------|
| HSD11B2                       | 26.67%   | 45.44% |
| SLC8A1                        | 89.40%   | 45.13% |
| C22orf13                      | 18.45%   | 45.05% |
| AP000354.4                    | 49.26%   | 44.87% |
| CPNE7                         | 13.59%   | 44.79% |
| IQCA                          | 19.76%   | 44.79% |
| UTP23                         | 18.42%   | 44.72% |
| NTF3                          | 15.58%   | 44.61% |
| UBE2C                         | 27.93%   | 44.53% |
| RAB5C                         | 29.92%   | 44.40% |
| TNFSF14                       | 1125.00% | 44.39% |
| CLC                           | 80.17%   | 44.23% |
| C1orf143                      | 177.35%  | 44.22% |
| THSD4                         | 21.01%   | 44.18% |
| MOBP                          | 32.53%   | 44.16% |
| SLIT1                         | 27.55%   | 44.12% |
| CTD-2330K9.3                  | 47.14%   | 44.08% |
| SLC46A3                       | 585.71%  | 44.05% |
| SYNPO                         | 20.17%   | 44.00% |
| LRRC40                        | 36.19%   | 43.88% |
| CLIC1,CLIC1,CLIC1,CLIC1,CLIC1 | 25.62%   | 43.76% |
| PIK3R3                        | 62.54%   | 43.73% |
| KRTAP20-2                     | 67.04%   | 43.68% |
| AC105345.3                    | 91.52%   | 43.61% |
| DPM2                          | 73.59%   | 43.61% |
| GPR37L1                       | 46.15%   | 43.61% |
| ZFAND2A                       | 36.18%   | 43.56% |
| AC084018.1                    | 72.53%   | 43.38% |
| RPUSD1                        | 53.63%   | 43.36% |
| LRRC56                        | 32.15%   | 43.31% |
| TSSK3                         | 12.34%   | 43.28% |
| SPRED3                        | 20.52%   | 43.22% |
| MURC                          | 81.85%   | 43.21% |
| PPARGC1B                      | 18.39%   | 43.11% |
| YSK4                          | 74.96%   | 43.03% |
| HP,AC009087.4-2               | 17.83%   | 42.99% |
| RP11-343J24.1                 | 108.98%  | 42.69% |
| IDO1                          | 36.59%   | 42.65% |
| EPHB4                         | 30.18%   | 42.59% |
| NAT8                          | 161.43%  | 42.54% |
| ARTS-1                        | 19.17%   | 42.52% |
| DLG1                          | 45.95%   | 42.52% |
| SLC4A2                        | 31.63%   | 42.49% |
| KIF2A                         | 195.88%  | 42.39% |
| RP1-212P9.2                   | 10.04%   | 42.33% |
| LILRB3                        | 25.55%   | 42.28% |
| KREMEN2                       | 37.37%   | 42.10% |

|                           |          |        |
|---------------------------|----------|--------|
| CYP4F3LP,AC140481.7,AC132 | 45.34%   | 42.09% |
| SP140L                    | 46.87%   | 42.02% |
| TMEM30A,COX7A2            | 24.85%   | 41.99% |
| SIGLECP16                 | 47.57%   | 41.96% |
| PNCK                      | 85.10%   | 41.91% |
| ANKRD45                   | 133.16%  | 41.88% |
| KRTAP3-3                  | 34.80%   | 41.83% |
| ADRA1B                    | 117.59%  | 41.62% |
| TBX20                     | 47.30%   | 41.55% |
| KLK10                     | 76.71%   | 41.55% |
| GLUDP2                    | 68.24%   | 41.54% |
| HS3ST1                    | 52.04%   | 41.50% |
| PDIA3P,PDIA3              | 14.75%   | 41.36% |
| NDUFV1                    | 16.57%   | 41.36% |
| C20orf91                  | 11.93%   | 41.22% |
| KIAA1467                  | 78.86%   | 41.19% |
| AFG3L1                    | 55.17%   | 41.17% |
| TNRC6C                    | 16.02%   | 41.12% |
| ATP7B                     | 54.89%   | 41.05% |
| RAB36                     | 62.31%   | 40.98% |
| UBE2J2                    | 33.89%   | 40.96% |
| IRX4                      | 1767.86% | 40.92% |
| AC025449.6-1              | 48.79%   | 40.84% |
| WBSCR17                   | 16.59%   | 40.82% |
| RUNX1                     | 11.65%   | 40.77% |
| RAD54L                    | 41.66%   | 40.73% |
| ADAMTS4                   | 103.68%  | 40.73% |
| NLGN4Y                    | 125.23%  | 40.60% |
| ZNF587                    | 155.56%  | 40.58% |
| AMAC1,POLR2A,AMAC1L3      | 34.30%   | 40.51% |
| NEK6                      | 113.93%  | 40.45% |
| FBXL18                    | 61.09%   | 40.38% |
| SLC38A10                  | 19.51%   | 40.34% |
| CFH                       | 307.64%  | 40.26% |
| HS6ST3                    | 37.89%   | 40.24% |
| RPL3                      | 42.63%   | 40.24% |
| PAQR5                     | 497.59%  | 40.20% |
| AC010536.8-2              | 34.93%   | 40.19% |
| SMCY                      | 38.54%   | 40.14% |
| NDUFA4                    | 70.48%   | 40.06% |
| HIC1                      | 34.51%   | 39.97% |
| KBTBD3                    | 68.43%   | 39.95% |
| A4GNT                     | 19.32%   | 39.84% |
| TNFAIP1                   | 196.99%  | 39.67% |
| ART3                      | 20.56%   | 39.64% |
| UPF2                      | 62.19%   | 39.63% |
| HNRNPAB                   | 57.60%   | 39.36% |

|                 |         |        |
|-----------------|---------|--------|
| ANKRD18B        | 19.25%  | 39.32% |
| AC093323.3      | 69.74%  | 39.32% |
| OR10J8P         | 25.51%  | 39.30% |
| CTNND2          | 13.59%  | 39.23% |
| PSMB2           | 155.99% | 39.10% |
| EDEM2           | 39.01%  | 39.10% |
| DNASE1          | 47.80%  | 39.05% |
| AGXT2L2         | 65.83%  | 39.03% |
| GPR26           | 27.50%  | 38.98% |
| NEUROG2         | 64.12%  | 38.91% |
| GPR172A         | 40.17%  | 38.75% |
| IL17B           | 23.51%  | 38.73% |
| SSTR5           | 63.31%  | 38.67% |
| CCNJ            | 46.57%  | 38.59% |
| ZNF497          | 33.48%  | 38.54% |
| PLA2G2C         | 31.22%  | 38.53% |
| CLTA            | 23.35%  | 38.52% |
| GNA15           | 10.27%  | 38.48% |
| BCR             | 22.86%  | 38.41% |
| UBXN6           | 69.04%  | 38.40% |
| PXN             | 29.11%  | 38.38% |
| UPB1            | 167.67% | 38.37% |
| GPR62           | 22.30%  | 38.37% |
| THRB,AC112217.2 | 22.00%  | 38.31% |
| ARF1            | 28.31%  | 38.27% |
| C1orf106        | 213.44% | 38.25% |
| SFN             | 47.69%  | 38.24% |
| HSD17B2         | 51.03%  | 38.16% |
| AC136632.3-2    | 10.30%  | 38.13% |
| KIAA0319        | 46.11%  | 38.10% |
| ULBP3           | 10.28%  | 38.07% |
| C1orf63         | 37.76%  | 37.99% |
| FOXA2           | 69.27%  | 37.95% |
| DSCR4           | 53.02%  | 37.94% |
| CYP2R1          | 18.87%  | 37.86% |
| CDADC1          | 36.55%  | 37.81% |
| GLB1,TMPPE      | 327.70% | 37.72% |
| ARGLU1          | 122.90% | 37.70% |
| RP11-178A10.1   | 116.53% | 37.62% |
| SC4MOL          | 211.86% | 37.56% |
| C11orf42        | 53.52%  | 37.56% |
| NPBWR2          | 62.66%  | 37.48% |
| NGFRAP1         | 35.76%  | 37.47% |
| FRMD3           | 58.04%  | 37.46% |
| CCRL2           | 22.29%  | 37.45% |
| CLEC4F          | 49.12%  | 37.39% |
| PHF19           | 62.46%  | 37.37% |

|               |         |        |
|---------------|---------|--------|
| AC006328.8    | 24.87%  | 37.36% |
| PPFIBP1       | 24.72%  | 37.31% |
| TMEM99        | 126.74% | 37.30% |
| EFTUD2        | 30.32%  | 37.27% |
| BRD1          | 45.08%  | 37.18% |
| VT11A         | 88.96%  | 37.18% |
| AC007750.5    | 93.52%  | 37.15% |
| TRA2A         | 247.37% | 37.05% |
| OBSCN         | 53.85%  | 36.94% |
| MRPS21        | 10.04%  | 36.88% |
| SVIL          | 26.05%  | 36.85% |
| CGN           | 40.21%  | 36.84% |
| LIPH          | 34.27%  | 36.83% |
| MAP1LC3A      | 58.58%  | 36.70% |
| GPR176        | 65.83%  | 36.68% |
| SLC10A3       | 91.89%  | 36.68% |
| THOC4         | 78.89%  | 36.65% |
| ELOVL5        | 477.24% | 36.63% |
| FCGBP         | 17.53%  | 36.60% |
| RP11-122G18.5 | 12.85%  | 36.56% |
| CALU          | 476.10% | 36.50% |
| CADM4         | 22.81%  | 36.48% |
| GPHA2         | 40.53%  | 36.24% |
| ADCY6         | 37.95%  | 36.20% |
| MYO5B         | 26.98%  | 36.15% |
| PHLDB3        | 40.72%  | 36.14% |
| GOT1          | 87.86%  | 36.08% |
| C21orf105     | 60.06%  | 36.01% |
| SERTAD1       | 40.60%  | 35.96% |
| OR3A3         | 62.55%  | 35.87% |
| IMPDH2        | 22.91%  | 35.82% |
| C20orf58      | 22.62%  | 35.75% |
| GPR19         | 114.22% | 35.70% |
| VPS4A         | 15.48%  | 35.68% |
| COX6B1        | 39.27%  | 35.57% |
| TCTEX1D1      | 193.70% | 35.55% |
| NCKIPSD       | 20.34%  | 35.49% |
| PRAMEF1       | 168.00% | 35.45% |
| NUPL1         | 843.58% | 35.42% |
| MMP24         | 56.10%  | 35.41% |
| C17orf65      | 48.03%  | 35.39% |
| RP11-332P22.1 | 173.00% | 35.38% |
| PDCD4         | 144.41% | 35.34% |
| CWF19L2       | 58.81%  | 35.28% |
| RP11-4C20.3   | 51.45%  | 35.25% |
| LELP1         | 38.03%  | 35.24% |
| MFF           | 115.35% | 35.23% |

|                             |          |        |
|-----------------------------|----------|--------|
| MEX3D                       | 24.45%   | 35.19% |
| C15orf27                    | 11.64%   | 35.09% |
| ACCN4                       | 10.33%   | 35.08% |
| PADI1                       | 53.84%   | 35.00% |
| FGF11                       | 91.54%   | 34.98% |
| NRARP                       | 2171.84% | 34.96% |
| TCERG1L                     | 100.80%  | 34.93% |
| ERCC6                       | 129.30%  | 34.92% |
| ANKRD58                     | 55.90%   | 34.89% |
| ZBP1                        | 19.13%   | 34.89% |
| RP11-307L3.2,AC069236.27    | 162.49%  | 34.79% |
| DPT                         | 15.74%   | 34.79% |
| LMTK3                       | 22.51%   | 34.72% |
| NFKB                        | 12.18%   | 34.72% |
| ZER1                        | 30.26%   | 34.66% |
| DNM1P33,DNM1P24             | 43.94%   | 34.62% |
| C20orf3                     | 62.19%   | 34.57% |
| PLK2                        | 78.86%   | 34.48% |
| MAN2B2                      | 11.38%   | 34.36% |
| NAV2                        | 59.25%   | 34.27% |
| HLA-DRB1,HLA-DRB1,HLA-DRE   | 13.09%   | 34.24% |
| FA2H                        | 32.76%   | 34.22% |
| AC020922.9                  | 121.38%  | 34.17% |
| AP000344.1                  | 14.34%   | 34.06% |
| CALN1                       | 116.87%  | 34.01% |
| COL17A1                     | 101.67%  | 33.98% |
| ADAM10                      | 116.41%  | 33.96% |
| PXDN                        | 151.01%  | 33.96% |
| ACTBL2,PLEKHB2,POTEE,A26C   | 112.99%  | 33.90% |
| C19orf36                    | 15.92%   | 33.88% |
| SLC25A2                     | 10.50%   | 33.86% |
| KLHL20                      | 78.09%   | 33.84% |
| PRKAR1B                     | 66.87%   | 33.80% |
| DMRT3                       | 10.45%   | 33.74% |
| RPS27L                      | 72.67%   | 33.71% |
| SFRS9                       | 35.36%   | 33.71% |
| ZNF806,ZNF285B              | 56.24%   | 33.50% |
| CLSPN                       | 15.99%   | 33.48% |
| C14orf142                   | 457.74%  | 33.46% |
| NRF1                        | 61.56%   | 33.44% |
| DUSP18                      | 60.12%   | 33.38% |
| CCDC46                      | 92.01%   | 33.28% |
| SLC16A11                    | 60.86%   | 33.08% |
| PLEC1                       | 24.56%   | 33.05% |
| DCTN5                       | 112.18%  | 33.04% |
| PRSS36                      | 334.82%  | 32.97% |
| C2orf27,CR382287.7-1,RP11-7 | 35.98%   | 32.86% |



|                            |         |        |
|----------------------------|---------|--------|
| C21orf74                   | 31.13%  | 32.85% |
| TBC1D2B                    | 33.68%  | 32.79% |
| ILDR1                      | 89.25%  | 32.74% |
| IREB2                      | 366.37% | 32.72% |
| CPT1C                      | 34.95%  | 32.70% |
| COL5A1                     | 41.61%  | 32.69% |
| RP11-107I14.1              | 36.33%  | 32.63% |
| ADAMTS16                   | 65.26%  | 32.61% |
| WDR68,KCNH6                | 52.36%  | 32.60% |
| MCRS1                      | 47.02%  | 32.41% |
| CAMK1                      | 15.02%  | 32.39% |
| L1CAM                      | 19.78%  | 32.09% |
| ALG5                       | 33.91%  | 31.98% |
| AC105233.12-3,AF228730.8-1 | 50.13%  | 31.97% |
| CD82                       | 82.51%  | 31.87% |
| SLC8A2                     | 27.01%  | 31.85% |
| AC004836.2                 | 34.75%  | 31.78% |
| KLRG1                      | 253.40% | 31.75% |
| SIM2                       | 28.08%  | 31.70% |
| AC093162.3,SNRPE           | 179.29% | 31.69% |
| NRL                        | 25.83%  | 31.68% |
| AHSA2                      | 21.48%  | 31.68% |
| AC145098.2-2               | 13.21%  | 31.66% |
| CLDN14                     | 66.59%  | 31.64% |
| GRID1                      | 287.58% | 31.60% |
| PRDM7                      | 13.44%  | 31.58% |
| GATAD2A                    | 176.25% | 31.54% |
| FBRSL1                     | 46.94%  | 31.51% |
| RGS10                      | 24.06%  | 31.47% |
| NKX2-1                     | 26.65%  | 31.44% |
| SNIP1                      | 117.59% | 31.40% |
| MFRP                       | 87.05%  | 31.36% |
| WDFY2                      | 61.34%  | 31.32% |
| FPR1                       | 21.41%  | 31.30% |
| DNAH2                      | 71.62%  | 31.27% |
| C1orf89                    | 106.10% | 31.25% |
| FARSA                      | 33.12%  | 31.22% |
| TAX1BP3                    | 25.02%  | 31.19% |
| PITPNM2                    | 276.70% | 31.07% |
| RP4-758J18.6               | 44.24%  | 31.07% |
| RP11-216L13.14,LCN8        | 13.74%  | 31.01% |
| MTMR15                     | 133.72% | 31.01% |
| CFLP2,CFL1                 | 18.00%  | 30.99% |
| RBPSUH                     | 41.96%  | 30.98% |
| IL2                        | 70.76%  | 30.90% |
| AC006050.3,AC006050.2      | 57.97%  | 30.80% |
| AC015849.2                 | 53.75%  | 30.80% |

|               |         |        |
|---------------|---------|--------|
| TOMM40        | 27.51%  | 30.79% |
| ABCC13        | 49.59%  | 30.75% |
| TRIB3         | 106.60% | 30.75% |
| FMO1          | 18.48%  | 30.74% |
| PGAM5         | 61.61%  | 30.73% |
| AOX1          | 82.24%  | 30.72% |
| AC084398.25-1 | 73.33%  | 30.71% |
| HTR6          | 52.62%  | 30.70% |
| RP1-43E13.2   | 283.39% | 30.68% |
| GABRA4        | 51.98%  | 30.65% |
| C8orf13       | 87.08%  | 30.65% |
| ACSM1         | 13.75%  | 30.60% |
| C12orf72      | 45.18%  | 30.49% |
| RP1-66N13.3   | 76.26%  | 30.47% |
| TSPAN31       | 66.50%  | 30.44% |
| AL139020.5    | 54.88%  | 30.39% |
| UBB           | 65.68%  | 30.37% |
| FAM18B2       | 54.70%  | 30.36% |
| OTUD7A        | 69.27%  | 30.25% |
| MYH9          | 48.06%  | 30.21% |
| ZNF598        | 69.58%  | 30.19% |
| DEFB126       | 34.24%  | 30.19% |
| NANOS1        | 183.42% | 30.18% |
| CAMKV         | 58.49%  | 30.17% |
| CYP4F12       | 35.92%  | 30.16% |
| IGSF11        | 10.32%  | 30.15% |
| SLIT3         | 30.52%  | 30.06% |
| MSRB2         | 44.24%  | 29.99% |
| ANK3          | 29.46%  | 29.97% |
| BFSP2         | 20.25%  | 29.94% |
| HM13          | 242.86% | 29.91% |
| HIRA          | 12.69%  | 29.86% |
| NELL2         | 207.56% | 29.71% |
| CCNI          | 161.64% | 29.70% |
| PUS7          | 112.11% | 29.60% |
| ABLIM2        | 24.55%  | 29.59% |
| TMEM179       | 117.42% | 29.51% |
| SLC35E4       | 66.33%  | 29.48% |
| GRIFIN        | 85.53%  | 29.46% |
| SCN8A         | 83.92%  | 29.40% |
| CSDC2         | 35.01%  | 29.36% |
| C9orf127      | 21.76%  | 29.17% |
| FAM45B,FAM45A | 83.31%  | 29.16% |
| GPR110        | 51.33%  | 29.16% |
| ZNF621        | 26.02%  | 29.15% |
| LGR6          | 75.62%  | 29.11% |
| DNAJC6        | 58.53%  | 29.06% |

|                             |         |        |
|-----------------------------|---------|--------|
| TRIM58                      | 38.19%  | 29.03% |
| SCNN1G                      | 312.29% | 29.01% |
| ZNF398                      | 26.19%  | 28.90% |
| AP005435.2-1,AP006587.1-2,† | 52.25%  | 28.86% |
| AC007551.3                  | 14.89%  | 28.75% |
| TTC9                        | 100.35% | 28.75% |
| DDX50                       | 16.52%  | 28.73% |
| C12orf67                    | 140.39% | 28.73% |
| TUBB3                       | 11.52%  | 28.71% |
| FNDC3A                      | 748.05% | 28.71% |
| GAS8                        | 25.59%  | 28.68% |
| RBBP7                       | 58.99%  | 28.62% |
| MATN1                       | 33.72%  | 28.58% |
| NUBP1                       | 70.88%  | 28.57% |
| C19orf15                    | 62.40%  | 28.54% |
| SEMA4D                      | 430.04% | 28.52% |
| RAI2                        | 90.35%  | 28.48% |
| PPP5C                       | 29.53%  | 28.40% |
| ZNF37A                      | 29.15%  | 28.40% |
| DLG3                        | 32.05%  | 28.40% |
| GLRXP,GLRX                  | 160.55% | 28.31% |
| WNT10A                      | 17.91%  | 28.30% |
| PRKAR1B                     | 20.59%  | 28.27% |
| SCD                         | 320.95% | 28.20% |
| TM2D3                       | 32.83%  | 28.19% |
| RASD2                       | 62.05%  | 28.11% |
| ANKRD13B                    | 22.55%  | 28.11% |
| XDH                         | 62.36%  | 28.03% |
| SLC25A21                    | 52.10%  | 27.98% |
| RP5-1061H20.3               | 11.26%  | 27.96% |
| CFI                         | 92.11%  | 27.79% |
| CHRNA6                      | 43.36%  | 27.78% |
| CTSZ                        | 46.24%  | 27.78% |
| C19orf73                    | 16.92%  | 27.76% |
| CRYBB2                      | 91.22%  | 27.74% |
| COX7A2                      | 202.34% | 27.74% |
| NMT1                        | 19.91%  | 27.68% |
| FBXO15                      | 80.49%  | 27.52% |
| IRG1                        | 45.09%  | 27.49% |
| OSTF1                       | 117.17% | 27.46% |
| C16orf3                     | 17.13%  | 27.44% |
| SECISBP2                    | 111.81% | 27.35% |
| RP11-172F4.2,TINP1          | 88.71%  | 27.32% |
| C14orf68                    | 45.53%  | 27.27% |
| MMP2                        | 184.16% | 27.26% |
| RP11-389K14.3               | 220.65% | 27.23% |
| PYCR1                       | 75.00%  | 27.21% |

|                |         |        |
|----------------|---------|--------|
| EVI5L          | 39.74%  | 27.20% |
| C12orf33       | 223.53% | 27.13% |
| C4orf42        | 33.33%  | 27.12% |
| CSE1L          | 99.60%  | 27.05% |
| PMF1           | 14.13%  | 27.00% |
| C22orf29,GNB1L | 68.70%  | 26.99% |
| RP11-250J16.1  | 45.49%  | 26.92% |
| FAM104B        | 32.79%  | 26.92% |
| ARSG           | 38.72%  | 26.91% |
| AC005077.11    | 23.74%  | 26.89% |
| CYTH2          | 56.13%  | 26.78% |
| PSD3           | 257.27% | 26.73% |
| CHKA           | 31.18%  | 26.72% |
| LRTM2          | 26.84%  | 26.72% |
| SLC38A10       | 41.55%  | 26.71% |
| NCRNA00118     | 43.23%  | 26.67% |
| RP4-662A9.2    | 12.55%  | 26.65% |
| SMCR8          | 299.58% | 26.60% |
| LRBA           | 209.02% | 26.59% |
| FAM69A         | 36.29%  | 26.56% |
| OAZ3           | 18.25%  | 26.54% |
| TM9SF3         | 76.87%  | 26.54% |
| GALT           | 31.46%  | 26.45% |
| CACNG6         | 37.76%  | 26.44% |
| HYDIN          | 66.22%  | 26.42% |
| KNG1           | 93.66%  | 26.40% |
| EVX2           | 43.31%  | 26.37% |
| COLEC11        | 41.89%  | 26.34% |
| AP000345.1     | 30.44%  | 26.31% |
| PDX1           | 112.99% | 26.22% |
| HAO2           | 16.37%  | 26.15% |
| SH3BP2         | 76.90%  | 26.12% |
| IFI6           | 319.76% | 26.10% |
| CENPV          | 86.09%  | 26.09% |
| C1orf212       | 76.49%  | 26.08% |
| ACP2           | 35.39%  | 26.06% |
| PCBP3          | 85.71%  | 25.99% |
| HTR3E          | 169.76% | 25.99% |
| ITGB1          | 46.28%  | 25.92% |
| PLP2           | 147.23% | 25.92% |
| P2RY6          | 12.23%  | 25.92% |
| PREPL          | 168.17% | 25.89% |
| TEX264         | 48.06%  | 25.88% |
| CA13           | 45.08%  | 25.87% |
| MFAP2          | 64.76%  | 25.84% |
| CHRNE          | 97.35%  | 25.83% |
| C14orf4        | 81.35%  | 25.80% |

|                      |         |        |
|----------------------|---------|--------|
| HDAC4                | 46.12%  | 25.73% |
| SLC17A4              | 62.31%  | 25.70% |
| MCHR1                | 12.05%  | 25.69% |
| SAMD9                | 38.56%  | 25.68% |
| ZNF644               | 56.17%  | 25.67% |
| TPM2                 | 19.92%  | 25.61% |
| AC124944.3           | 57.63%  | 25.61% |
| AC003075.4           | 11.99%  | 25.59% |
| LEFTY1               | 71.43%  | 25.58% |
| GPIHBP1              | 106.90% | 25.52% |
| OLFM2                | 45.18%  | 25.50% |
| RP11-23J9.3          | 27.05%  | 25.48% |
| SRPK2                | 56.39%  | 25.47% |
| TMEM126B             | 210.37% | 25.40% |
| FAM53C               | 55.88%  | 25.38% |
| STAT3                | 483.13% | 25.31% |
| DACT3                | 14.38%  | 25.30% |
| SLC35C1              | 15.35%  | 25.18% |
| HGD                  | 31.93%  | 25.14% |
| UBE2N                | 52.50%  | 25.13% |
| CYP2A7               | 28.65%  | 25.07% |
| GUCY2F               | 28.90%  | 25.07% |
| NAPB                 | 110.92% | 25.05% |
| GIGYF1               | 69.12%  | 25.05% |
| ARAP1                | 23.31%  | 25.03% |
| ACRV1                | 21.45%  | 24.94% |
| FAM129C              | 20.03%  | 24.90% |
| KIF1C                | 84.56%  | 24.88% |
| PPIB                 | 79.79%  | 24.87% |
| TYMP                 | 40.94%  | 24.85% |
| SIGLEC14             | 34.13%  | 24.80% |
| TPK1                 | 24.39%  | 24.78% |
| CACHD1               | 157.89% | 24.77% |
| STBD1                | 171.36% | 24.74% |
| CLASP1               | 22.70%  | 24.73% |
| NPR3                 | 32.47%  | 24.71% |
| ZMYND15              | 35.13%  | 24.70% |
| DPP6                 | 15.94%  | 24.61% |
| ENOX2                | 393.90% | 24.59% |
| ETNK1                | 20.16%  | 24.49% |
| ZNF320,ZNF28,ZNF816A | 52.66%  | 24.44% |
| PARP1                | 20.28%  | 24.41% |
| LAT2                 | 42.83%  | 24.37% |
| GFM2                 | 91.53%  | 24.32% |
| TAAR5                | 34.59%  | 24.30% |
| COPS6                | 38.10%  | 24.24% |
| REPS2                | 92.22%  | 24.21% |

|                           |          |        |
|---------------------------|----------|--------|
| FNBP1                     | 372.48%  | 24.15% |
| SPINT2                    | 105.74%  | 24.07% |
| NIPA1                     | 112.55%  | 24.07% |
| LIMK2                     | 68.93%   | 24.01% |
| C4orf32                   | 704.78%  | 23.97% |
| NDUFA11                   | 131.59%  | 23.96% |
| TMEM225                   | 78.50%   | 23.93% |
| HLA-DRA,HLA-DRA,HLA-DRA,I | 62.96%   | 23.87% |
| TSSK6                     | 60.50%   | 23.83% |
| C2orf50                   | 28.56%   | 23.82% |
| TMEM101                   | 22.75%   | 23.72% |
| GDPD4                     | 23.98%   | 23.66% |
| RTN3                      | 32.37%   | 23.64% |
| ZNF649,ZNF577             | 22.48%   | 23.63% |
| IL22RA2                   | 233.67%  | 23.61% |
| SH3TC1                    | 16.81%   | 23.61% |
| ZNF789                    | 96.35%   | 23.61% |
| WDR40A                    | 49.36%   | 23.58% |
| MCRS1                     | 14.30%   | 23.52% |
| LENG9                     | 89.53%   | 23.40% |
| LRP3                      | 30.93%   | 23.33% |
| AC021054.28               | 106.26%  | 23.31% |
| AC005077.11               | 25.27%   | 23.27% |
| C6orf168                  | 97.26%   | 23.26% |
| SOX7                      | 23.47%   | 23.25% |
| C7orf51                   | 16.62%   | 23.21% |
| TMCO1                     | 25.57%   | 23.18% |
| AP000769.5-1              | 10.92%   | 23.17% |
| RAB31                     | 47.87%   | 23.15% |
| C12orf42                  | 34.87%   | 23.13% |
| RP4-604K5.1               | 1332.50% | 23.04% |
| MPEG1                     | 99.17%   | 22.98% |
| FPR3                      | 181.40%  | 22.93% |
| COX5B                     | 19.74%   | 22.86% |
| PQLC1                     | 18.78%   | 22.80% |
| PEF1                      | 27.20%   | 22.76% |
| SDF2                      | 127.93%  | 22.70% |
| ETV3                      | 169.58%  | 22.67% |
| RHOV                      | 22.10%   | 22.67% |
| SUMO3                     | 50.41%   | 22.62% |
| SLC25A28                  | 14.34%   | 22.60% |
| UBOX5,FASTKD5             | 93.08%   | 22.60% |
| HIPK1                     | 128.41%  | 22.56% |
| ZMAT3                     | 115.35%  | 22.54% |
| CD34                      | 42.15%   | 22.53% |
| TCP11L1                   | 26.01%   | 22.52% |
| C7orf33                   | 216.57%  | 22.51% |

|                           |         |        |
|---------------------------|---------|--------|
| AL031846.2,ASCC2,ASCC2    | 14.10%  | 22.48% |
| CA5B                      | 66.09%  | 22.45% |
| IGSF8                     | 50.29%  | 22.43% |
| CALR3,MED26               | 55.71%  | 22.34% |
| SLC27A1                   | 108.68% | 22.27% |
| SCRN1                     | 116.34% | 22.26% |
| OTUD7A                    | 31.80%  | 22.22% |
| RP11-552E20.3             | 113.87% | 22.19% |
| DNAJB3,AC114812.5         | 54.90%  | 22.17% |
| UBE2I                     | 45.52%  | 22.12% |
| EPHA10                    | 55.69%  | 22.05% |
| C9orf78                   | 45.83%  | 21.97% |
| ELOVL1                    | 24.82%  | 21.95% |
| C21orf29,KRTAP10-2        | 68.40%  | 21.94% |
| CHD9                      | 27.91%  | 21.91% |
| FAM98A                    | 93.78%  | 21.90% |
| RP11-445H22.4             | 17.21%  | 21.87% |
| FAM103A1,RP3-427A4.2,RPSE | 46.07%  | 21.85% |
| GPC2                      | 26.75%  | 21.85% |
| SUMF1                     | 31.90%  | 21.81% |
| ZIK1                      | 88.13%  | 21.80% |
| L3MBTL4                   | 53.93%  | 21.77% |
| MAN2C1                    | 13.67%  | 21.77% |
| LNX1                      | 90.55%  | 21.76% |
| HNRNPUL1                  | 51.62%  | 21.69% |
| MSX2                      | 50.79%  | 21.55% |
| C8orf44                   | 12.47%  | 21.54% |
| TFR2                      | 16.86%  | 21.53% |
| TBC1D1                    | 17.55%  | 21.51% |
| C3orf10                   | 26.65%  | 21.45% |
| EFNB3                     | 10.36%  | 21.44% |
| MMD2                      | 11.98%  | 21.40% |
| ZNF324                    | 16.07%  | 21.38% |
| SFMBT2                    | 81.49%  | 21.37% |
| HTATIP2                   | 125.16% | 21.35% |
| HHAT                      | 61.92%  | 21.35% |
| RAB40B                    | 30.89%  | 21.33% |
| PTPRJ                     | 65.32%  | 21.32% |
| SETD5                     | 34.39%  | 21.25% |
| PHTF2                     | 86.72%  | 21.21% |
| TMEM45A                   | 313.26% | 21.10% |
| TIGIT                     | 16.32%  | 21.04% |
| ZNF238                    | 19.54%  | 20.98% |
| HBP1                      | 193.98% | 20.95% |
| SLC22A4                   | 206.49% | 20.94% |
| GSTK1                     | 27.53%  | 20.94% |
| MOGAT3                    | 38.02%  | 20.89% |

|                            |          |        |
|----------------------------|----------|--------|
| KRTCAP2                    | 26.39%   | 20.85% |
| DKK3                       | 28.91%   | 20.84% |
| AP1                        | 24.02%   | 20.81% |
| ACTL7A                     | 28.25%   | 20.77% |
| MLX                        | 19.73%   | 20.77% |
| UBR4                       | 48.50%   | 20.76% |
| CASZ1                      | 10.16%   | 20.72% |
| PBX2,AGER,PBX2,AGER,PBX2,, | 26.58%   | 20.70% |
| CAPZA1                     | 40.59%   | 20.69% |
| ZNF445                     | 13.72%   | 20.66% |
| CDC42EP1                   | 33.74%   | 20.66% |
| BIRC5                      | 91.26%   | 20.62% |
| 7SK                        | 170.56%  | 20.50% |
| SERPINA11                  | 107.32%  | 20.47% |
| MFAP3                      | 1343.53% | 20.46% |
| RIC8B                      | 60.68%   | 20.43% |
| CYP46A1                    | 68.91%   | 20.40% |
| ASTL                       | 12.14%   | 20.38% |
| RAD1                       | 90.98%   | 20.38% |
| TCP11L1                    | 218.57%  | 20.36% |
| PFN1,RP4-560B9.2           | 60.28%   | 20.30% |
| NID1                       | 39.38%   | 20.23% |
| IKBKAP                     | 55.02%   | 20.23% |
| H2AFX                      | 66.84%   | 20.22% |
| CUGBP1                     | 116.60%  | 20.22% |
| ITM2C                      | 34.82%   | 20.20% |
| VPS35                      | 21.30%   | 20.20% |
| MUC5AC,MUC5B               | 45.49%   | 20.16% |
| FANCE                      | 43.30%   | 20.14% |
| LCE1C,LCE2B,LCE1F          | 35.11%   | 20.14% |
| NEO1                       | 98.96%   | 20.13% |
| DHRS11                     | 165.45%  | 20.12% |
| SORBS1                     | 457.37%  | 20.11% |
| STOM                       | 63.27%   | 20.10% |
| AC130454.2                 | 46.15%   | 20.10% |
| KLC3                       | 113.21%  | 20.06% |
| RP4-617C6.1                | 37.65%   | 20.00% |
| MAP2K5                     | 120.26%  | 20.00% |



Values represent mast cell genes upregulated by at least 10% by FcεRI stimulation that were upregulated (least inhibited) >20% by Inos-sorted most upregulated to least upregulated in column D

| Gene_symbol           | % Increase (-) to (+) | % Inhibition by Inos |
|-----------------------|-----------------------|----------------------|
| ELF1                  | 13.55%                | -1135%               |
| FOS                   | 120.46%               | -769.64%             |
| EGR2                  | 1821.64%              | -619.26%             |
| RGS1                  | 149.49%               | -571.30%             |
| JMJD1C                | 234.59%               | -564.38%             |
| VAC14                 | 2154.36%              | -531.71%             |
| HSPH1                 | 129.36%               | -427.75%             |
| LAPTM4A               | 104.32%               | -415.47%             |
| GNAI1                 | 465.23%               | -409.70%             |
| RGL1                  | 466.14%               | -403.05%             |
| TCEAL1                | 165.30%               | -379.72%             |
| EVI2B                 | 262.93%               | -371.50%             |
| BMI1                  | 436.33%               | -355.35%             |
| MOBK13                | 105.06%               | -352.62%             |
| PPP2CA                | 133.03%               | -336.35%             |
| RHOB                  | 1174.11%              | -332.94%             |
| TCEA1                 | 217.42%               | -330.63%             |
| ATP6V1G1              | 100.58%               | -310.38%             |
| C14orf43              | 133.88%               | -301.98%             |
| CEP350                | 141.35%               | -301.46%             |
| TIPARP                | 115.06%               | -301.22%             |
| AC110926.4,WBP11P1,WB | 41.33%                | -292.30%             |
| RB1CC1                | 74.74%                | -290.32%             |
| KLF9                  | 65.53%                | -285.37%             |
| DUSP4                 | 500.23%               | -281.30%             |
| DONSON                | 40.83%                | -280.91%             |
| GADD45A               | 32.16%                | -279.24%             |
| TRIM33                | 40.52%                | -277.63%             |
| PHF3                  | 34.08%                | -276.55%             |
| ISOC1                 | 134.93%               | -274.03%             |
| KRCC1                 | 132.36%               | -271.71%             |
| STAM                  | 190.96%               | -270.84%             |
| STX11                 | 166.50%               | -269.69%             |
| SPRY1                 | 1627.47%              | -266.86%             |
| HMG20A                | 15.49%                | -266.30%             |
| ZMIZ1                 | 10.98%                | -265.49%             |
| ADIPOR1               | 22.94%                | -258.48%             |
| TSC22D1               | 313.87%               | -256.38%             |
| RAB11FIP1             | 313.82%               | -255.48%             |
| C13orf15              | 1231.52%              | -253.11%             |
| HAT1                  | 47.03%                | -252.99%             |
| EGR3                  | 849.33%               | -250.42%             |
| TMED5                 | 513.06%               | -249.30%             |
| SCOC                  | 307.28%               | -246.85%             |

|                          |          |          |
|--------------------------|----------|----------|
| ARL4P,NSUN7,AC124914.3   | 45.60%   | -246.74% |
| AC011494.2-2,RP13-158L7  | 132.61%  | -246.31% |
| PDCD6                    | 106.13%  | -245.17% |
| CRBN                     | 40.96%   | -244.68% |
| GPR183                   | 599.51%  | -243.42% |
| COPEB                    | 300.63%  | -240.56% |
| SEC24B                   | 176.30%  | -235.62% |
| RORA                     | 239.15%  | -233.78% |
| CPEB2                    | 145.53%  | -233.33% |
| OCIAD1                   | 109.53%  | -232.16% |
| DDHD2                    | 10.37%   | -229.35% |
| FCHO2                    | 139.39%  | -225.32% |
| TMEM181                  | 196.59%  | -221.58% |
| PTP4A1                   | 366.88%  | -221.15% |
| THOC7                    | 45.89%   | -221.13% |
| EMP1                     | 344.44%  | -216.88% |
| RCN2                     | 287.86%  | -215.84% |
| PANX1                    | 213.43%  | -215.56% |
| RAD51C                   | 65.16%   | -214.14% |
| GPR42P,FFAR3             | 200.88%  | -212.15% |
| AC093081.2,RWDD4A        | 55.94%   | -210.32% |
| CCL4L1,CCL4,CCL4L2       | 1998.72% | -209.60% |
| HLTF                     | 155.34%  | -208.57% |
| EBAG9                    | 132.18%  | -207.58% |
| TNPO1                    | 145.70%  | -206.55% |
| CLEC2B                   | 20.19%   | -206.51% |
| PTPN22                   | 622.22%  | -206.00% |
| INTS6                    | 40.99%   | -205.97% |
| COX17,RP11-189B4.3       | 23.75%   | -205.44% |
| NT5DC1                   | 107.97%  | -204.79% |
| GPRC5A                   | 103.29%  | -203.83% |
| GPR34                    | 471.20%  | -203.64% |
| CSDA                     | 188.07%  | -203.16% |
| SNX2                     | 40.08%   | -199.64% |
| ABCD3                    | 176.36%  | -199.34% |
| RDH10                    | 235.46%  | -199.29% |
| TMEM30A,COX7A2           | 177.70%  | -199.04% |
| ALS2                     | 76.72%   | -198.75% |
| RP11-422P24.9,RPL34,RPL5 | 20.24%   | -198.66% |
| CCDC59                   | 23.60%   | -198.49% |
| TICAM2                   | 444.71%  | -197.79% |
| FAM175A                  | 133.76%  | -194.91% |
| CCL4L1,CCL4,CCL4L2       | 4653.85% | -194.77% |
| MT1A,MT1X                | 168.16%  | -194.48% |
| APOLD1                   | 74.39%   | -194.10% |
| ANKFY1                   | 28.50%   | -193.60% |
| SAMSN1                   | 154.48%  | -193.55% |

|                         |          |          |
|-------------------------|----------|----------|
| IARS                    | 66.95%   | -193.23% |
| NUDT5                   | 26.54%   | -192.41% |
| YWHAH                   | 115.22%  | -192.05% |
| SEC62                   | 163.34%  | -191.68% |
| VIM                     | 32.60%   | -191.44% |
| ARMC1                   | 195.99%  | -191.36% |
| AC004945.2              | 14.54%   | -190.67% |
| EIF3E                   | 251.53%  | -189.12% |
| PSCDBP                  | 297.54%  | -188.73% |
| NFE2L2                  | 900.92%  | -186.86% |
| KLF4                    | 150.50%  | -186.43% |
| APPBP2                  | 35.86%   | -185.50% |
| C6orf115                | 271.18%  | -184.59% |
| SEC23B                  | 17.90%   | -184.41% |
| ATP5G3                  | 122.79%  | -184.32% |
| NFKBIZ                  | 113.27%  | -184.22% |
| KIAA1644                | 50.30%   | -182.97% |
| AC020571.3              | 2126.91% | -181.56% |
| FAM172A                 | 95.44%   | -180.37% |
| H2AFY                   | 89.74%   | -180.06% |
| AC058791.1              | 705.28%  | -180.04% |
| PPP2R5A                 | 53.15%   | -179.35% |
| AKAP11                  | 365.44%  | -179.30% |
| ASNS                    | 79.70%   | -179.28% |
| PIAS1                   | 66.07%   | -178.37% |
| OSGIN2                  | 85.16%   | -177.37% |
| DCP1A                   | 37.07%   | -176.42% |
| HIATL1                  | 373.59%  | -176.10% |
| TIAL1                   | 54.41%   | -175.35% |
| ARPC3                   | 113.65%  | -174.44% |
| LY96                    | 27.54%   | -174.06% |
| SLC2A3,SLC2A14          | 126.65%  | -173.99% |
| ZHX1                    | 41.66%   | -173.78% |
| PPP1R10,PPP1R10,PPP1R1  | 12.25%   | -173.60% |
| NFIL3                   | 294.43%  | -171.64% |
| BRAF                    | 120.20%  | -171.56% |
| RC3H1                   | 34.69%   | -171.05% |
| ITPRIP                  | 412.84%  | -170.70% |
| ETNK1                   | 707.48%  | -170.60% |
| ECD                     | 43.04%   | -170.60% |
| CNBP                    | 63.45%   | -169.97% |
| SEMA4A                  | 63.54%   | -169.90% |
| HECA                    | 100.33%  | -169.68% |
| RGPD8,RGPD6,RGPD4,GCC   | 783.70%  | -169.33% |
| F2RL2                   | 11.36%   | -169.07% |
| KNTC1                   | 87.18%   | -168.99% |
| AC116337.2-1,FGF14,Y_RN | 22.41%   | -168.98% |

|                          |          |          |
|--------------------------|----------|----------|
| GLA                      | 227.34%  | -168.79% |
| STK38L                   | 82.39%   | -168.49% |
| RP4-761I2.3              | 91.88%   | -168.46% |
| TBC1D24                  | 67.32%   | -168.31% |
| SAMD9L                   | 411.58%  | -167.49% |
| COPEB                    | 764.80%  | -166.87% |
| DTL                      | 563.22%  | -166.51% |
| SENP7                    | 31.90%   | -166.38% |
| GPR137B                  | 94.35%   | -166.32% |
| LUC7L2                   | 59.09%   | -165.09% |
| ATL3                     | 111.94%  | -164.91% |
| TFB2M                    | 114.80%  | -164.78% |
| XPR1                     | 221.88%  | -164.37% |
| STK39                    | 72.30%   | -164.22% |
| RIOK2                    | 13.44%   | -162.61% |
| ZNF354A                  | 24.59%   | -162.34% |
| C15orf29                 | 10.62%   | -162.32% |
| NONO,NOB1                | 101.02%  | -162.05% |
| AK3                      | 65.63%   | -161.62% |
| LTBP2                    | 156.02%  | -161.41% |
| ZNRF2                    | 78.43%   | -161.07% |
| ITGB3BP                  | 57.12%   | -160.80% |
| RNF14                    | 254.78%  | -160.22% |
| RRM2B                    | 93.41%   | -160.15% |
| CCDC50                   | 94.78%   | -159.96% |
| SMARCA1                  | 14.53%   | -159.03% |
| SYAP1                    | 48.21%   | -158.88% |
| S100A10                  | 13.53%   | -158.64% |
| RASGEF1B                 | 232.78%  | -158.60% |
| RSRC2                    | 125.93%  | -158.34% |
| LEPR                     | 605.00%  | -158.33% |
| ARL6IP5                  | 338.74%  | -158.11% |
| CCL3,CCL3L1,CCL3L1,TBC1I | 229.34%  | -156.80% |
| RND3                     | 73.83%   | -156.74% |
| FNDC3B                   | 10.00%   | -156.33% |
| CASD1                    | 187.01%  | -155.97% |
| ASPH                     | 296.93%  | -155.80% |
| NUS1                     | 18.80%   | -155.49% |
| DONSON                   | 13.51%   | -155.39% |
| BHLHE41                  | 41.01%   | -155.21% |
| MEGF9                    | 70.26%   | -155.14% |
| MN1                      | 237.17%  | -154.72% |
| C20orf30                 | 71.22%   | -153.97% |
| PRNP                     | 1314.29% | -152.35% |
| EXOC8                    | 210.38%  | -152.17% |
| ZFP36L1                  | 230.02%  | -151.97% |
| NONO,NOB1                | 99.88%   | -151.06% |

|                         |           |          |
|-------------------------|-----------|----------|
| LITAF                   | 135.59%   | -150.82% |
| PJA2                    | 132.97%   | -150.52% |
| TNKS2                   | 71.27%    | -150.00% |
| TMED6                   | 68.97%    | -148.64% |
| PCGF5                   | 156.81%   | -148.36% |
| BZW1,RP11-1K20.2        | 85.69%    | -147.70% |
| C4orf41                 | 24.52%    | -147.15% |
| UCHL5                   | 163.87%   | -147.10% |
| RAB3IP                  | 95.27%    | -147.03% |
| EGR4                    | 31615.63% | -147.02% |
| SKP1A                   | 43.64%    | -146.91% |
| GALC                    | 397.79%   | -146.72% |
| AD000091.1,RPL23AP37,RF | 148.96%   | -146.12% |
| PTPRR                   | 564.54%   | -145.68% |
| FTSJD1                  | 455.56%   | -145.33% |
| YPEL5                   | 76.04%    | -144.06% |
| MTERFD1                 | 43.60%    | -143.87% |
| IDE                     | 24.16%    | -143.04% |
| SPRY2                   | 657.65%   | -143.01% |
| MIS12                   | 49.10%    | -142.98% |
| MMADHC                  | 617.86%   | -142.66% |
| C1orf149,AC013409.4     | 77.89%    | -142.58% |
| RILPL2                  | 131.34%   | -142.50% |
| CCL4L1,CCL4,CCL4L2      | 10035.90% | -142.47% |
| ASAP1                   | 91.07%    | -142.42% |
| CGA                     | 168.49%   | -141.91% |
| UBE2K                   | 75.84%    | -141.83% |
| C13orf23                | 22.67%    | -141.64% |
| RP11-336N8.4,CKS2       | 332.21%   | -141.61% |
| PDS5A,AC105287.5-2      | 36.59%    | -141.32% |
| RP11-472G23.8,RP11-472G | 59.12%    | -141.28% |
| RP11-128M1.1            | 287.97%   | -141.28% |
| CREBZF                  | 33.93%    | -141.14% |
| CCL8                    | 17.34%    | -140.26% |
| TMEM60                  | 66.67%    | -139.67% |
| hsa-mir-568             | 62.85%    | -139.62% |
| AC083871.2,SDHD         | 239.90%   | -139.34% |
| AEBP2                   | 187.34%   | -139.21% |
| PSMA1                   | 242.41%   | -139.16% |
| TDO2                    | 77.33%    | -138.81% |
| MBNL1                   | 14.74%    | -138.28% |
| SAPS3                   | 272.81%   | -137.90% |
| AZIN1                   | 58.84%    | -137.83% |
| PTPN2                   | 31.45%    | -137.46% |
| IL1B                    | 31.22%    | -137.39% |
| NT5C3,AC092661.2        | 343.96%   | -137.00% |
| PLOD2                   | 57.32%    | -136.71% |

|                          |          |          |
|--------------------------|----------|----------|
| FASTKD2                  | 19.54%   | -136.69% |
| TYW1                     | 16.78%   | -136.64% |
| GBAS                     | 272.46%  | -136.41% |
| EIF4E                    | 5923.20% | -136.39% |
| ARID2                    | 210.84%  | -136.05% |
| MAPK6,PKHD1L1,AC02203    | 1237.11% | -136.00% |
| GNG2                     | 39.47%   | -135.94% |
| FBXO8                    | 10.12%   | -135.35% |
| AP002364.4-1,TUBA1B,TUE  | 124.51%  | -135.30% |
| EIF4G2                   | 12.23%   | -135.27% |
| AC074008.4,ALMS1         | 101.58%  | -134.93% |
| RP11-557H15.2            | 772.47%  | -134.86% |
| DCN                      | 23.50%   | -134.78% |
| CRSP3                    | 496.26%  | -134.64% |
| PTPN1                    | 80.50%   | -133.46% |
| LYST,RP5-1043F6.2        | 59.86%   | -133.43% |
| ZNHIT6                   | 131.69%  | -133.30% |
| VEZT                     | 91.07%   | -133.08% |
| DYNLL1,AL136040.5        | 26.84%   | -132.88% |
| TOPBP1                   | 70.37%   | -132.84% |
| TMEM77                   | 32.84%   | -132.54% |
| PKN2                     | 38.70%   | -132.44% |
| MRPL1                    | 153.12%  | -132.42% |
| DOCK11                   | 89.19%   | -132.36% |
| MDH1                     | 86.69%   | -132.18% |
| MEX3C                    | 691.43%  | -131.92% |
| RP4-702J19.1,AC005740.1, | 112.79%  | -131.83% |
| PTPN9                    | 111.94%  | -131.52% |
| CCDC117                  | 181.25%  | -131.11% |
| TXN                      | 96.50%   | -131.07% |
| PTPLAD1                  | 342.73%  | -131.01% |
| PRCP                     | 40.61%   | -130.74% |
| CCNI                     | 33.79%   | -130.48% |
| MOAP1                    | 66.14%   | -130.08% |
| TMEM209                  | 95.04%   | -129.94% |
| STX7                     | 28.81%   | -129.82% |
| AADAACL1                 | 130.95%  | -129.71% |
| NDUFAF1                  | 50.75%   | -128.92% |
| C6orf72                  | 62.82%   | -128.82% |
| PPARGC1A                 | 113.64%  | -128.74% |
| SRD5A2L                  | 429.52%  | -128.70% |
| IL8                      | 602.43%  | -128.62% |
| RASSF5                   | 93.79%   | -128.19% |
| RP11-361F15.2            | 236.73%  | -127.58% |
| OAT                      | 240.54%  | -127.52% |
| DHX15                    | 35.79%   | -127.38% |
| PTPRM                    | 155.19%  | -127.37% |

|                          |         |          |
|--------------------------|---------|----------|
| CAPN2                    | 17.91%  | -127.30% |
| SF3B4                    | 21.79%  | -127.16% |
| RPL23AP1,RPL23AP1,Z9763  | 38.57%  | -127.06% |
| STK38                    | 67.46%  | -126.95% |
| DUSP1                    | 54.97%  | -126.74% |
| GTF3C3                   | 335.20% | -126.65% |
| AC020698.4,AC103796.3,H  | 267.51% | -126.62% |
| CLDN12,GTPBP10           | 13.12%  | -126.33% |
| RP11-110C15.4,RPL4,RP11- | 13.29%  | -126.16% |
| TRDMT1                   | 632.35% | -125.70% |
| SYCP2L                   | 20.44%  | -125.70% |
| RHOBTB3                  | 123.89% | -124.83% |
| MPHOSPH6                 | 87.62%  | -124.62% |
| CLCN3                    | 313.38% | -124.28% |
| ACTR2,AP000357.4,ZNF90   | 74.78%  | -124.02% |
| UBE2Q2                   | 81.96%  | -123.99% |
| RAB2B                    | 46.17%  | -123.86% |
| C1orf27                  | 192.66% | -123.75% |
| MSH6                     | 127.32% | -123.56% |
| PDCD6IP                  | 67.58%  | -123.52% |
| RPL7,AC011382.4-1,AC010  | 53.46%  | -123.29% |
| AC074183.2,SPOCK3,HMGI   | 76.49%  | -123.27% |
| CXYorf3                  | 92.50%  | -122.85% |
| MTPN                     | 33.99%  | -122.66% |
| GALK2                    | 17.78%  | -122.64% |
| SET                      | 169.66% | -122.39% |
| TSPYL1                   | 391.82% | -122.25% |
| ZDHC13                   | 67.49%  | -122.04% |
| RBM39,RP6-218J18.2       | 228.61% | -121.56% |
| FRAP1                    | 63.67%  | -121.54% |
| CLTC                     | 39.05%  | -121.53% |
| PTBP2                    | 237.04% | -121.35% |
| DLD                      | 48.64%  | -121.32% |
| RP11-110C15.4,RPL4,RP11- | 27.13%  | -121.28% |
| FOSL2                    | 46.04%  | -121.26% |
| SSR1                     | 95.19%  | -121.12% |
| RPS4P16,RP11-550E22.3,VI | 47.75%  | -121.06% |
| SSH2,RP11-565J7.3,RPL21F | 78.36%  | -121.04% |
| AC090377.15-1,C17orf57,N | 193.75% | -121.02% |
| NARS                     | 88.73%  | -120.82% |
| ATP2B4                   | 55.04%  | -120.82% |
| MTCH2                    | 19.04%  | -120.21% |
| MLLT11                   | 102.09% | -119.88% |
| JMJD2C                   | 218.46% | -119.58% |
| RANP1,RANP1,AC079789.1   | 145.23% | -119.35% |
| CCL3L1,CCL3,CCL3L1,TBC1F | 459.44% | -119.20% |
| SRGN                     | 739.39% | -118.56% |

|                          |          |          |
|--------------------------|----------|----------|
| NFAT5                    | 743.35%  | -118.41% |
| POLR2A                   | 31.74%   | -118.22% |
| SEMA3C                   | 161.34%  | -118.01% |
| TOMM22                   | 22.35%   | -117.95% |
| HSPA1A,HSPA1B,HSPA1B,F   | 22.74%   | -117.93% |
| DUSP2                    | 129.29%  | -117.33% |
| GPBP1                    | 16.80%   | -117.32% |
| WBP5                     | 267.24%  | -117.28% |
| SPON1                    | 135.71%  | -117.14% |
| CCNL1                    | 794.22%  | -117.02% |
| EIF4E                    | 210.95%  | -116.85% |
| UQCRB,UQCRBP1            | 27.38%   | -116.41% |
| PRMT6                    | 61.28%   | -116.37% |
| MGAT2                    | 337.56%  | -116.18% |
| SFRS1                    | 124.21%  | -115.68% |
| ACADM                    | 96.90%   | -115.67% |
| C14orf100                | 164.17%  | -115.62% |
| BRAP,AC090023.20,PCNP    | 188.34%  | -115.28% |
| MAP3K8                   | 382.69%  | -115.19% |
| LIPA                     | 68.91%   | -114.98% |
| ARL8B                    | 1147.69% | -114.97% |
| RP11-77G22.3,SDCBP       | 746.32%  | -114.93% |
| CENPA                    | 72.08%   | -114.35% |
| ERCC8                    | 14.33%   | -114.32% |
| FBXO21                   | 21.14%   | -114.10% |
| YIPF6                    | 173.53%  | -113.80% |
| CD44                     | 306.68%  | -113.52% |
| POLR2B                   | 104.15%  | -113.48% |
| CGRRF1                   | 232.76%  | -112.95% |
| RGS2                     | 62.75%   | -112.81% |
| RNF19A                   | 111.48%  | -112.75% |
| SH2B3                    | 93.27%   | -112.66% |
| ME2,RP11-460C6.1         | 292.51%  | -112.45% |
| DPM1                     | 179.37%  | -112.36% |
| CKAP2                    | 324.45%  | -111.73% |
| ELL2                     | 154.82%  | -111.68% |
| CBWD5,CBWD7,CBWD6,CE     | 71.79%   | -111.62% |
| MTDH                     | 48.51%   | -111.41% |
| PIGF                     | 226.75%  | -111.40% |
| TWISTNB                  | 160.91%  | -111.36% |
| PDE8A                    | 193.37%  | -111.30% |
| ERBB2IP                  | 99.70%   | -111.22% |
| DCDC1,RP11-513I15.3,CYC! | 125.00%  | -111.11% |
| PPM1A                    | 117.88%  | -111.06% |
| C19orf12                 | 16.88%   | -110.76% |
| PAN2                     | 23.35%   | -110.64% |
| RASA1                    | 118.73%  | -110.56% |



|                        |          |          |
|------------------------|----------|----------|
| ZDHHC2                 | 152.80%  | -110.20% |
| USP3                   | 85.74%   | -110.00% |
| CLASP2                 | 11.75%   | -109.61% |
| AC104297.1             | 231.37%  | -109.47% |
| AMD1                   | 1723.47% | -109.46% |
| PSMD6                  | 82.95%   | -109.45% |
| NRIP3                  | 480.81%  | -109.39% |
| RGS5                   | 105.20%  | -109.37% |
| TUBB6                  | 76.15%   | -109.30% |
| MTRF1                  | 187.60%  | -109.20% |
| PDE6D                  | 116.47%  | -108.85% |
| RB1                    | 687.10%  | -108.81% |
| GJB2                   | 17.86%   | -108.31% |
| VEGFC                  | 90.84%   | -108.22% |
| CDK8                   | 525.64%  | -108.20% |
| SYTL2                  | 184.12%  | -108.19% |
| ZEB2                   | 154.86%  | -108.18% |
| RPS13P2                | 19.69%   | -107.79% |
| ABCC4                  | 755.45%  | -107.76% |
| SFRS11                 | 60.28%   | -107.46% |
| KLHDC2                 | 143.43%  | -107.32% |
| EFEMP1                 | 108.14%  | -107.28% |
| RP11-201K10.1,HMGN2,AC | 23.18%   | -107.24% |
| VWA5A                  | 122.73%  | -107.14% |
| COX7A2L                | 121.82%  | -106.59% |
| CYTH3                  | 452.57%  | -106.58% |
| SLC2A10                | 170.43%  | -106.47% |
| DAPK1                  | 51.08%   | -106.39% |
| AC093401.4-1,B3GNT1    | 1209.38% | -106.28% |
| STRAP                  | 150.97%  | -106.11% |
| PEX6                   | 39.42%   | -106.07% |
| HSPA1B,HSPA1B,HSPA1B,H | 321.05%  | -105.94% |
| ARHGEF12               | 661.25%  | -105.91% |
| OR2AE1                 | 27.64%   | -105.87% |
| KIFC1,KIFC1,KIFC1      | 322.13%  | -105.86% |
| JOSD1                  | 170.43%  | -105.78% |
| BTG2                   | 177.16%  | -105.72% |
| RP4-761I2.3            | 102.25%  | -105.35% |
| MYD88                  | 47.01%   | -105.35% |
| RBM3                   | 142.03%  | -105.32% |
| GRINL1A                | 32.08%   | -104.72% |
| NFKB1                  | 460.80%  | -104.71% |
| RRP12                  | 148.76%  | -104.63% |
| CHD9                   | 54.39%   | -104.58% |
| ELOVL4                 | 59.13%   | -104.52% |
| NAB1                   | 120.77%  | -104.37% |
| IGF1                   | 67.74%   | -104.20% |

|                        |          |          |
|------------------------|----------|----------|
| VIL2                   | 180.72%  | -104.03% |
| LETM2                  | 35.96%   | -103.78% |
| RNASEH2B               | 261.79%  | -103.26% |
| HNRNPK                 | 236.88%  | -103.20% |
| PRSS23                 | 36.18%   | -103.01% |
| CENPC1,AC010201.18     | 230.00%  | -102.96% |
| PTPRG                  | 32.99%   | -102.93% |
| SFRS3                  | 101.61%  | -102.82% |
| BCL6                   | 42.54%   | -102.81% |
| MITD1                  | 130.90%  | -102.73% |
| SOAT1                  | 236.51%  | -102.55% |
| AC016582.2             | 78.61%   | -102.52% |
| DIRC2                  | 144.57%  | -102.47% |
| VBP1                   | 275.48%  | -102.41% |
| TBX3                   | 150.23%  | -102.34% |
| IARS2                  | 502.11%  | -102.22% |
| DDX47                  | 322.89%  | -101.85% |
| TMEM47                 | 168.87%  | -101.71% |
| GHITM                  | 50.44%   | -101.38% |
| PTGS2                  | 165.08%  | -100.91% |
| ANKS1A                 | 14.47%   | -100.82% |
| POLR1D                 | 89.94%   | -100.62% |
| RP4-604K5.1            | 155.33%  | -100.48% |
| MED30                  | 97.92%   | -100.42% |
| CSTF3                  | 14.82%   | -100.38% |
| COPS8                  | 18.86%   | -100.10% |
| ATG3                   | 45.25%   | -99.55%  |
| GPR141                 | 272.90%  | -99.45%  |
| GSPT1                  | 177.25%  | -99.37%  |
| TBL1XR1                | 162.79%  | -99.24%  |
| HSPA1A,HSPA1B,HSPA1B,F | 38.24%   | -99.16%  |
| CNRIP1                 | 56.67%   | -98.95%  |
| RP3-468O1.2,FDX1       | 916.77%  | -98.86%  |
| MTRR                   | 30.70%   | -98.67%  |
| ARHGAP21               | 79.80%   | -98.57%  |
| TPM4                   | 127.75%  | -98.43%  |
| MRPL13                 | 35.56%   | -98.17%  |
| STCH                   | 104.68%  | -97.98%  |
| CHUK                   | 220.70%  | -97.56%  |
| PLCXD2                 | 1017.80% | -97.50%  |
| NDFIP1                 | 120.59%  | -96.95%  |
| MACF1                  | 101.40%  | -96.75%  |
| UBE2D3P,UBE2D3         | 163.29%  | -96.66%  |
| MDM2                   | 362.11%  | -96.47%  |
| BIRC2                  | 117.80%  | -96.23%  |
| PCNA                   | 149.22%  | -96.22%  |
| NCKAP1                 | 20.16%   | -96.07%  |

|                        |          |         |
|------------------------|----------|---------|
| HPRT1                  | 389.94%  | -95.90% |
| TMCO1                  | 32.31%   | -95.47% |
| IL1RN                  | 48.80%   | -95.45% |
| RAD21                  | 386.05%  | -95.15% |
| OXCT1                  | 201.64%  | -95.10% |
| MRPL44                 | 18.69%   | -95.06% |
| FXR1                   | 27.92%   | -94.97% |
| AP1G1                  | 27.88%   | -94.37% |
| PAIP2                  | 203.60%  | -94.35% |
| GNL2                   | 15.33%   | -94.34% |
| AC010907.3,TMSL3,TMSB4 | 36.55%   | -94.33% |
| PSMB1                  | 32.00%   | -94.10% |
| AKAP7                  | 121.93%  | -94.06% |
| AP3M1                  | 30.65%   | -93.95% |
| NUDT9                  | 99.64%   | -93.94% |
| TRIO                   | 12.86%   | -93.85% |
| MUT                    | 132.51%  | -93.78% |
| TANK                   | 470.16%  | -93.75% |
| COL3A1                 | 64.43%   | -93.72% |
| GSTM3                  | 29.52%   | -93.68% |
| PELI1                  | 1550.29% | -93.64% |
| CCNB1                  | 49.35%   | -93.49% |
| CRISPLD2               | 162.37%  | -93.30% |
| XRCC5                  | 108.83%  | -93.28% |
| HERC2P2                | 54.52%   | -93.27% |
| C6orf61                | 82.19%   | -92.96% |
| RP11-388B24.3,DDX10    | 58.02%   | -92.89% |
| DNA2                   | 16.17%   | -92.84% |
| STEAP2                 | 235.99%  | -92.81% |
| MRPS35                 | 42.54%   | -92.66% |
| C12orf11               | 41.62%   | -92.61% |
| SLC40A1                | 171.81%  | -92.59% |
| PRMT10                 | 903.57%  | -92.53% |
| DCUN1D3                | 47.34%   | -92.52% |
| AC092798.3,TAF9B       | 49.24%   | -92.28% |
| BMI1,COMMD3            | 14.50%   | -92.11% |
| HNRPLL                 | 486.27%  | -92.08% |
| ZNFX1                  | 23.76%   | -91.49% |
| WDR3                   | 36.20%   | -91.39% |
| DEK                    | 151.86%  | -91.31% |
| DCTN6                  | 437.23%  | -91.30% |
| PITRM1                 | 36.99%   | -91.30% |
| CCDC138                | 138.08%  | -91.28% |
| SFRS4                  | 173.33%  | -91.22% |
| RSRC1                  | 243.09%  | -91.08% |
| ATP2A2                 | 364.29%  | -91.05% |
| CPD                    | 142.28%  | -90.92% |

|                          |         |         |
|--------------------------|---------|---------|
| PIGH                     | 16.96%  | -90.84% |
| EGR1                     | 47.75%  | -90.51% |
| TMEM63B                  | 48.40%  | -90.41% |
| ATP6V1C1                 | 103.36% | -90.27% |
| TIMP2                    | 327.26% | -90.23% |
| OGT                      | 465.07% | -90.21% |
| TNFSF5IP1                | 13.40%  | -90.13% |
| ZNF331                   | 42.48%  | -90.02% |
| TMEM49,hsa-mir-21        | 755.07% | -90.00% |
| TAF2                     | 81.50%  | -89.92% |
| MESDC1                   | 81.37%  | -89.83% |
| NUDT2                    | 21.69%  | -89.83% |
| NEU1,NEU1,NEU1,NEU1,NI   | 133.29% | -89.72% |
| DUSP12                   | 29.82%  | -89.69% |
| SMAD4                    | 162.21% | -89.67% |
| OLFM1                    | 43.32%  | -89.63% |
| KRAS                     | 64.01%  | -89.61% |
| IFRD1                    | 172.21% | -89.40% |
| AP4B1                    | 66.79%  | -89.29% |
| KIAA0513                 | 65.72%  | -89.23% |
| RP11-565J7.3,AC087190.5- | 104.01% | -89.18% |
| SIRT1                    | 76.85%  | -89.10% |
| SPEN                     | 86.08%  | -88.94% |
| GPATCH2                  | 29.50%  | -88.87% |
| FBXO3                    | 148.25% | -88.69% |
| NTAN1                    | 24.83%  | -88.57% |
| RAB6A,RAB6C              | 356.65% | -88.57% |
| AC023161.24-2            | 104.73% | -88.56% |
| GS1-309P15.3,RDX         | 350.00% | -88.48% |
| RCBTB2                   | 100.78% | -88.48% |
| PELI2                    | 357.77% | -88.34% |
| ASXL2                    | 269.77% | -88.21% |
| SAT1                     | 67.20%  | -87.76% |
| TFG                      | 291.70% | -87.44% |
| HECTD1                   | 30.73%  | -87.38% |
| PQLC3                    | 129.97% | -87.37% |
| MYL12B                   | 36.95%  | -87.13% |
| DYRK1A                   | 145.26% | -87.02% |
| ASNSD1                   | 51.86%  | -86.95% |
| RAB7A                    | 111.99% | -86.73% |
| SDHB                     | 33.55%  | -86.65% |
| ITFG1                    | 561.54% | -86.60% |
| SKAP2                    | 127.43% | -86.58% |
| WDR41                    | 195.27% | -86.57% |
| TCTE1P,DYNLT3            | 383.19% | -86.43% |
| AL049778.3,CNIH          | 589.89% | -86.20% |
| RP5-837D10.2,PTGES3      | 158.55% | -85.98% |

|                         |          |         |
|-------------------------|----------|---------|
| SOCS4                   | 25.69%   | -85.22% |
| SRP54                   | 156.23%  | -85.18% |
| RAD23B                  | 142.17%  | -85.18% |
| TNFSF10                 | 43.07%   | -85.15% |
| GSK3B                   | 22.99%   | -84.98% |
| MRPS14                  | 76.70%   | -84.80% |
| RIMKLA                  | 24.40%   | -84.76% |
| IL18R1                  | 323.62%  | -84.49% |
| GAPT                    | 205.68%  | -84.39% |
| KLHL6                   | 87.20%   | -84.35% |
| WDR35                   | 92.50%   | -84.23% |
| GTF2B                   | 13.92%   | -84.23% |
| ESD                     | 132.44%  | -84.22% |
| RP11-125K10.2,AC084854. | 116.79%  | -84.16% |
| ACSL5                   | 246.28%  | -84.09% |
| TPBG                    | 387.13%  | -83.68% |
| C2orf69                 | 136.10%  | -83.66% |
| GNPNAT1                 | 12.03%   | -83.64% |
| ABCA1                   | 22.24%   | -83.60% |
| IQGAP1                  | 19.07%   | -83.32% |
| FOSL2                   | 60.55%   | -83.22% |
| AL139023.6,BNIP3        | 63.31%   | -83.19% |
| AC006465.3              | 466.67%  | -83.16% |
| NEDD9                   | 135.44%  | -83.06% |
| CD58,RP4-655J12.5       | 1264.36% | -82.87% |
| C5orf32                 | 102.03%  | -82.84% |
| AL121809.6-1,FKBP3      | 32.90%   | -82.69% |
| HIBADH                  | 262.25%  | -82.15% |
| PRKAA1                  | 73.12%   | -81.99% |
| KIAA0907                | 109.24%  | -81.97% |
| AC103796.3              | 288.69%  | -81.78% |
| RP4-706A16.3,SNORD58B,  | 108.22%  | -81.69% |
| CRK                     | 135.46%  | -81.63% |
| PCCB                    | 44.77%   | -81.58% |
| PCDH18                  | 77.27%   | -81.56% |
| FAM63B                  | 36.53%   | -81.50% |
| ATP5L                   | 156.14%  | -81.33% |
| COX16                   | 108.19%  | -81.20% |
| BTG1                    | 358.63%  | -81.18% |
| BTN2A2                  | 162.32%  | -81.01% |
| RNF139                  | 124.37%  | -80.97% |
| ALG5                    | 253.47%  | -80.91% |
| KIAA1715                | 118.25%  | -80.68% |
| PAIP1,AC026271.5        | 350.57%  | -80.68% |
| C10orf97                | 230.29%  | -80.62% |
| ELOVL6                  | 12.70%   | -80.49% |
| MAGT1                   | 115.72%  | -80.48% |

|                         |         |         |
|-------------------------|---------|---------|
| FN1                     | 67.70%  | -80.47% |
| C14orf10                | 246.63% | -80.38% |
| MLH1                    | 85.81%  | -80.16% |
| TMEM165                 | 158.48% | -80.10% |
| ERO1L                   | 202.83% | -80.06% |
| PLAUR                   | 28.97%  | -80.00% |
| VMA21                   | 28.45%  | -79.94% |
| ZNF403                  | 124.74% | -79.93% |
| AC093509.1,AC109456.3-1 | 82.08%  | -79.88% |
| PSMB7                   | 34.24%  | -79.77% |
| PRKAR1A                 | 99.31%  | -79.60% |
| TMBIM4                  | 47.29%  | -79.54% |
| DKK1                    | 178.16% | -79.48% |
| CTNNB1                  | 115.01% | -79.47% |
| C7orf23                 | 118.97% | -79.46% |
| TNFAIP6                 | 75.79%  | -79.38% |
| ALS2CR12                | 60.43%  | -79.37% |
| DYRK3                   | 208.61% | -79.37% |
| RXRA                    | 83.66%  | -79.34% |
| PTS                     | 144.39% | -79.19% |
| SC5DL                   | 698.42% | -79.18% |
| BHLHE40                 | 155.33% | -79.16% |
| KCTD7                   | 273.54% | -79.10% |
| MRPL15                  | 12.18%  | -78.98% |
| RERE                    | 32.40%  | -78.92% |
| CUL2                    | 120.76% | -78.81% |
| SNX1                    | 18.74%  | -78.80% |
| GNG5                    | 124.58% | -78.77% |
| SRP9L1,SRP9             | 92.90%  | -78.75% |
| RBM47                   | 42.19%  | -78.69% |
| NRIP1                   | 29.56%  | -78.38% |
| PBEF1,NAMPTL            | 281.84% | -78.38% |
| FASLG                   | 63.26%  | -78.33% |
| RP4-647M16.1,RP11-54O7  | 52.54%  | -77.96% |
| AKAP13                  | 113.19% | -77.94% |
| PYGL                    | 34.46%  | -77.86% |
| FST                     | 144.83% | -77.85% |
| FAM44A                  | 43.30%  | -77.74% |
| TNRC6B                  | 66.91%  | -77.73% |
| ESCO1                   | 46.34%  | -77.73% |
| C20orf12                | 92.18%  | -77.70% |
| C11orf58                | 169.32% | -77.66% |
| GDE1                    | 51.38%  | -77.62% |
| MKNK1                   | 99.39%  | -77.41% |
| TCTEX1D2,TM4SF19        | 13.79%  | -77.27% |
| SH3GL2                  | 132.45% | -77.27% |
| RDH14                   | 112.71% | -77.22% |

|                         |          |         |
|-------------------------|----------|---------|
| MRPL49                  | 23.16%   | -77.14% |
| LMNA                    | 174.27%  | -76.71% |
| DDX42                   | 14.41%   | -76.69% |
| ARF4                    | 92.71%   | -76.51% |
| NEDD4                   | 125.11%  | -76.37% |
| ARL5A,RP3-481A17.1      | 961.70%  | -76.35% |
| VGLL4                   | 13.75%   | -76.32% |
| RP11-553A21.3           | 65.92%   | -76.24% |
| BZW1,BZW1L1             | 670.00%  | -76.19% |
| CALM2,RP11-367H5.5      | 357.15%  | -76.15% |
| TTC5                    | 57.30%   | -76.03% |
| SRP9L1,SRP9             | 51.10%   | -75.89% |
| ENY2                    | 11.92%   | -75.66% |
| MARCH7                  | 135.06%  | -75.55% |
| TNKS1BP1                | 37.63%   | -75.41% |
| ZNF830                  | 110.39%  | -75.40% |
| SRP14P1,SRP14           | 41.68%   | -75.01% |
| USP9X                   | 76.96%   | -75.00% |
| PDZD11                  | 43.51%   | -74.94% |
| RAP2A                   | 28.89%   | -74.91% |
| YWHAQ                   | 172.51%  | -74.66% |
| GNAI3                   | 97.55%   | -74.62% |
| RP11-396K3.1,GTF2I      | 25.39%   | -74.55% |
| ARMCX3                  | 98.48%   | -74.43% |
| STK4                    | 36.27%   | -74.25% |
| CXCL5                   | 113.20%  | -74.21% |
| SMARCE1                 | 254.67%  | -74.12% |
| CCNA1                   | 659.88%  | -73.82% |
| HADH                    | 38.83%   | -73.81% |
| RP1-138A5.1,AC009812.17 | 20.48%   | -73.70% |
| SMNDC1                  | 298.34%  | -73.69% |
| TRAF5                   | 141.46%  | -73.53% |
| ATP6V1D                 | 55.86%   | -73.45% |
| FUNDC2                  | 76.17%   | -73.30% |
| ZC3H11A,RP11-74E24.2    | 47.71%   | -73.22% |
| C7orf38                 | 13.08%   | -73.19% |
| TPST1                   | 39.11%   | -73.16% |
| UXS1                    | 66.67%   | -73.10% |
| RP11-398K22.3,OOEP,RP11 | 114.17%  | -73.09% |
| TAC1                    | 5354.29% | -73.07% |
| ARL15                   | 37.48%   | -73.07% |
| HDAC2                   | 182.23%  | -73.05% |
| CXCL16                  | 14.55%   | -72.42% |
| VDAC2,AC007318.5        | 38.84%   | -72.24% |
| ANKRA2                  | 43.68%   | -72.09% |
| TATDN1                  | 11.43%   | -71.96% |
| PIG-Y                   | 216.88%  | -71.89% |

|                         |          |         |
|-------------------------|----------|---------|
| PIP5K3                  | 777.98%  | -71.89% |
| ASCC3,AC019080.1,RP11-6 | 28.45%   | -71.87% |
| ITPKB                   | 954.90%  | -71.75% |
| RP11-77G22.3,SDCBP      | 381.02%  | -71.70% |
| AC011998.1,PDE11A,API5L | 442.75%  | -71.64% |
| MGEA5                   | 93.91%   | -71.36% |
| RAP1A                   | 76.67%   | -71.33% |
| SERPINB9                | 479.52%  | -71.30% |
| SNAP23                  | 32.07%   | -71.18% |
| AKIRIN2                 | 60.28%   | -71.07% |
| SASH1                   | 16.49%   | -71.06% |
| CHD7                    | 121.26%  | -71.00% |
| FBXO11                  | 351.73%  | -70.91% |
| COX6C                   | 11.72%   | -70.89% |
| SESTD1                  | 102.60%  | -70.83% |
| CTNNA1                  | 183.88%  | -70.82% |
| RABEP1                  | 80.16%   | -70.81% |
| MGST1                   | 243.26%  | -70.60% |
| RAPGEF2                 | 268.68%  | -70.52% |
| AC005534.6,AC022431.1,R | 75.86%   | -70.51% |
| FZD1                    | 73.60%   | -70.44% |
| SMC2                    | 120.55%  | -70.43% |
| SEPT10                  | 256.37%  | -70.31% |
| IVNS1ABP                | 359.23%  | -70.19% |
| DUSP6                   | 1084.00% | -70.16% |
| INSIG1                  | 528.74%  | -70.04% |
| CDC27                   | 66.24%   | -69.92% |
| SAT1                    | 321.25%  | -69.84% |
| FRG1,RP11-764K9.4,FRG1B | 62.67%   | -69.72% |
| RBM26                   | 238.29%  | -69.71% |
| SECISBP2L               | 88.67%   | -69.63% |
| FRYL                    | 201.69%  | -69.62% |
| ZNF586                  | 113.97%  | -69.49% |
| TCP1                    | 55.46%   | -69.35% |
| NSMCE2                  | 273.50%  | -69.34% |
| RP11-125K10.2,AC021224. | 124.63%  | -69.30% |
| TCERG1                  | 282.63%  | -69.26% |
| RPL37AP1,RPL37A         | 10.36%   | -69.19% |
| EIF5                    | 146.33%  | -69.17% |
| EIF4A2                  | 105.46%  | -69.15% |
| ARG2                    | 156.32%  | -69.12% |
| C18orf21                | 30.57%   | -69.09% |
| SERPINB2                | 222.89%  | -69.03% |
| ASAP2                   | 25.20%   | -68.90% |
| GALNT12                 | 33.18%   | -68.90% |
| PAK1                    | 357.63%  | -68.86% |
| MAP2K4                  | 132.68%  | -68.82% |



|                          |         |         |
|--------------------------|---------|---------|
| DENND4C                  | 13.39%  | -68.70% |
| NDUFB3                   | 24.89%  | -68.60% |
| TIMM23                   | 36.92%  | -68.54% |
| FECH                     | 199.12% | -68.44% |
| ARPP19                   | 367.49% | -68.39% |
| BTF3,CTD-2090I13.4,AC021 | 105.33% | -68.37% |
| UBA3                     | 29.00%  | -68.34% |
| HEATR5B                  | 727.43% | -68.34% |
| RTCD1                    | 200.00% | -68.29% |
| CRKL                     | 149.56% | -68.14% |
| S100A11                  | 29.24%  | -67.99% |
| C18orf8                  | 21.00%  | -67.96% |
| PCGF6,AC073539.3         | 178.39% | -67.90% |
| ATP11B                   | 245.84% | -67.86% |
| TOMM20                   | 122.75% | -67.84% |
| TM2D3                    | 64.32%  | -67.74% |
| EXOC6                    | 14.89%  | -67.71% |
| GLUD1,GLUD2              | 208.14% | -67.45% |
| CREM                     | 884.99% | -67.43% |
| PUS3                     | 114.19% | -67.33% |
| PRKDC                    | 390.17% | -67.32% |
| SCD5                     | 232.74% | -67.31% |
| ANXA5                    | 113.37% | -67.18% |
| AC093673.5               | 81.95%  | -67.16% |
| CCDC49                   | 11.98%  | -67.15% |
| FZD10                    | 71.34%  | -67.09% |
| IDH3A                    | 23.09%  | -67.05% |
| RAP2A                    | 47.42%  | -66.94% |
| TM7SF3                   | 96.79%  | -66.94% |
| DNAJC3                   | 60.10%  | -66.85% |
| AP001157.4-1,C1QBP       | 72.09%  | -66.84% |
| CEP78                    | 120.96% | -66.80% |
| LYPLA2,LYPLA2P1,LYPLA2P  | 58.19%  | -66.78% |
| MTSS1                    | 43.10%  | -66.75% |
| C7orf10                  | 20.86%  | -66.73% |
| JMJD1A                   | 21.27%  | -66.70% |
| TMEM64                   | 161.27% | -66.60% |
| PDIK1L                   | 39.34%  | -66.60% |
| ARNT                     | 81.72%  | -66.60% |
| FOXP1                    | 29.94%  | -66.58% |
| CAV1                     | 25.59%  | -66.50% |
| SHOC2                    | 107.88% | -66.29% |
| UTP18                    | 337.57% | -66.29% |
| SNTB2                    | 74.28%  | -66.07% |
| RP5-961K14.1,MYST2,ACOC  | 17.49%  | -66.05% |
| PPWD1                    | 91.67%  | -65.97% |
| PPAP2B                   | 260.86% | -65.93% |

|                           |         |         |
|---------------------------|---------|---------|
| LPHN1                     | 17.66%  | -65.90% |
| BUD31                     | 16.31%  | -65.87% |
| AC010976.2,IWS1           | 18.94%  | -65.86% |
| SEC23IP                   | 260.10% | -65.77% |
| AC093616.4                | 222.32% | -65.69% |
| PER3                      | 655.75% | -65.66% |
| GFPT2                     | 21.38%  | -65.64% |
| TXNL1                     | 121.33% | -65.58% |
| PDE8A                     | 89.71%  | -65.50% |
| DDX46                     | 101.25% | -65.50% |
| AC025279.6-2,AC106782.5   | 205.43% | -65.48% |
| SSX5,SSX1,SSX3,SSX4B,SSX: | 263.32% | -65.43% |
| SERPINI1                  | 430.30% | -65.31% |
| SUPV3L1                   | 232.19% | -65.29% |
| RP11-165H4.2              | 41.10%  | -65.26% |
| AGPAT9                    | 312.12% | -65.24% |
| FAM46A                    | 322.12% | -65.20% |
| SLC44A1                   | 134.28% | -65.02% |
| AC074387.1,RPL22          | 95.21%  | -64.97% |
| AHR                       | 70.81%  | -64.91% |
| CEP55                     | 73.89%  | -64.84% |
| TMED10                    | 127.37% | -64.81% |
| SAP18,AC013733.5          | 57.68%  | -64.77% |
| ELOVL7                    | 480.77% | -64.71% |
| ZNF195                    | 49.84%  | -64.55% |
| AC004771.1                | 62.24%  | -64.49% |
| ZNF542                    | 31.21%  | -64.18% |
| UGT2B17,AC147055.2        | 518.26% | -64.14% |
| HSP90AB1,HSP90AB3P        | 59.34%  | -64.05% |
| C7orf42                   | 76.01%  | -64.04% |
| PNRC2,AL390877.1,BX511C   | 323.58% | -63.60% |
| RP11-365O16.1,ZNF706      | 78.39%  | -63.58% |
| LRAP                      | 67.52%  | -63.47% |
| Z97634.3                  | 21.39%  | -63.38% |
| HPGD                      | 151.03% | -63.25% |
| LRP8                      | 144.88% | -63.24% |
| LGALS8                    | 134.73% | -63.09% |
| DDR2                      | 21.97%  | -63.08% |
| FOXF1                     | 249.95% | -63.05% |
| PAQR3                     | 285.53% | -62.97% |
| RNF115                    | 75.87%  | -62.96% |
| ATG12                     | 24.60%  | -62.84% |
| MLL5                      | 404.72% | -62.80% |
| SLC38A2                   | 90.10%  | -62.76% |
| CCDC53                    | 28.56%  | -62.57% |
| ZFP91                     | 208.17% | -62.51% |
| RPL34                     | 153.30% | -62.20% |

|                         |          |         |
|-------------------------|----------|---------|
| LSM8                    | 51.28%   | -62.08% |
| YY1                     | 171.91%  | -61.99% |
| HNRNPA3                 | 194.99%  | -61.99% |
| TBX15                   | 55.22%   | -61.95% |
| ZBED5                   | 76.39%   | -61.93% |
| NDUFA12                 | 40.41%   | -61.91% |
| SLC37A3                 | 133.04%  | -61.83% |
| SPAG5                   | 157.51%  | -61.82% |
| POLR1B                  | 54.36%   | -61.81% |
| CASC4                   | 283.54%  | -61.74% |
| TPST2                   | 136.14%  | -61.74% |
| MAP2K1IP1               | 175.36%  | -61.66% |
| SMYD3                   | 73.48%   | -61.58% |
| ANXA4                   | 131.70%  | -61.53% |
| MUDENG                  | 74.84%   | -61.51% |
| COPS2                   | 31.16%   | -61.47% |
| SEC22B                  | 120.64%  | -61.36% |
| AL136219.17-1           | 30.45%   | -61.20% |
| STK17B                  | 258.93%  | -61.19% |
| AC004918.1-1            | 19.83%   | -61.15% |
| AC080075.3,MRPL50       | 142.64%  | -61.00% |
| TSG101                  | 24.30%   | -60.99% |
| COX6A1P2,COX6A1,RP11-1  | 117.57%  | -60.93% |
| TTC14                   | 168.76%  | -60.91% |
| RRP15                   | 80.40%   | -60.81% |
| FAM107B                 | 768.50%  | -60.71% |
| MMD                     | 42.32%   | -60.62% |
| ING1                    | 118.90%  | -60.44% |
| TRAF3IP2                | 16.91%   | -60.44% |
| TRIM38                  | 15.45%   | -60.42% |
| KIAA0182                | 55.46%   | -60.34% |
| STIM1                   | 40.02%   | -60.31% |
| NDUFA1                  | 53.35%   | -60.25% |
| RPL10A,AC120036.5-2,RP3 | 25.83%   | -60.20% |
| FOXO1A                  | 91.32%   | -60.19% |
| HNRPA2B1                | 122.79%  | -60.11% |
| PGM3                    | 24.10%   | -59.95% |
| DENND1B                 | 86.19%   | -59.84% |
| WDR1                    | 25.59%   | -59.82% |
| SEPT12                  | 56.82%   | -59.63% |
| ATP6V1A                 | 155.27%  | -59.61% |
| DNAJB6                  | 93.90%   | -59.55% |
| VPS36                   | 48.64%   | -59.55% |
| DNAJB9                  | 1931.26% | -59.55% |
| JPH4                    | 37.01%   | -59.49% |
| DAZAP2                  | 112.06%  | -59.46% |
| MGST3                   | 36.59%   | -59.38% |

|                 |          |         |
|-----------------|----------|---------|
| WASF3           | 536.65%  | -59.32% |
| SGK1            | 769.90%  | -59.12% |
| NDUFA2          | 22.71%   | -59.06% |
| NAT1            | 245.93%  | -58.96% |
| USP14           | 224.56%  | -58.87% |
| MARCH3          | 340.64%  | -58.86% |
| AC004696.1      | 149.64%  | -58.74% |
| LAMA2           | 217.39%  | -58.56% |
| MFAP1,SERINC4   | 54.80%   | -58.44% |
| ACSL1           | 482.40%  | -58.39% |
| SH3BGRL         | 45.47%   | -58.39% |
| EGFR            | 540.31%  | -58.35% |
| DNAJA2          | 115.98%  | -58.19% |
| C9orf3          | 56.33%   | -58.18% |
| ZFAND3          | 1812.90% | -58.18% |
| FBXW7           | 32.90%   | -58.17% |
| PRG4            | 74.53%   | -58.08% |
| DENR            | 29.86%   | -57.96% |
| HECW2           | 149.82%  | -57.74% |
| DCTN4           | 76.19%   | -57.72% |
| LHFP            | 56.51%   | -57.68% |
| WDR44           | 55.82%   | -57.61% |
| TMEM22          | 406.31%  | -57.61% |
| EBPL,AC093536.4 | 19.17%   | -57.57% |
| TIMM8A,TIMM8AP  | 41.44%   | -57.52% |
| SERPINB8        | 128.13%  | -57.51% |
| KPNA1           | 129.55%  | -57.43% |
| RPS12           | 184.92%  | -57.41% |
| RABEP1          | 91.39%   | -57.31% |
| PPM1K           | 90.17%   | -57.28% |
| SEC31A          | 257.45%  | -57.25% |
| RAB11FIP2       | 26.03%   | -57.09% |
| FOXC1           | 118.33%  | -57.05% |
| LDLR            | 253.27%  | -57.05% |
| RAPGEF2         | 112.46%  | -57.00% |
| RAP2C           | 90.87%   | -56.95% |
| FAM20B          | 83.94%   | -56.94% |
| DUSP14          | 379.11%  | -56.94% |
| CHD6            | 191.65%  | -56.90% |
| RAB1A           | 214.50%  | -56.86% |
| TAL1            | 26.17%   | -56.82% |
| GRB2            | 54.87%   | -56.74% |
| CTPS2           | 125.97%  | -56.65% |
| ZMAT2           | 59.46%   | -56.39% |
| SRI             | 176.77%  | -56.37% |
| DNAJC1          | 19.10%   | -56.37% |
| KLHDC2          | 253.05%  | -56.35% |

|                         |          |         |
|-------------------------|----------|---------|
| WSB1                    | 60.27%   | -56.31% |
| NMI                     | 35.82%   | -56.26% |
| HTATSF1                 | 29.74%   | -56.19% |
| DDX21                   | 1418.57% | -56.16% |
| ANKRD27                 | 21.29%   | -56.15% |
| TNS1                    | 13.58%   | -56.12% |
| FBXO25                  | 105.78%  | -56.09% |
| SERINC3                 | 296.50%  | -56.05% |
| GLOD4                   | 14.88%   | -56.04% |
| PAM                     | 525.02%  | -55.92% |
| EIF1                    | 71.29%   | -55.89% |
| PIGG                    | 23.16%   | -55.67% |
| PPP6C                   | 93.94%   | -55.58% |
| ATAD2B                  | 76.66%   | -55.52% |
| KIF13A                  | 35.48%   | -55.31% |
| RP11-416N13.1,MPZL1     | 42.28%   | -55.23% |
| CCT4                    | 168.65%  | -55.12% |
| AC004917.2              | 542.66%  | -55.06% |
| PDK3                    | 202.18%  | -55.00% |
| HNRPA2B1                | 117.98%  | -55.00% |
| FUT8                    | 71.09%   | -54.88% |
| PTTG1IP                 | 36.41%   | -54.83% |
| NAT5                    | 207.28%  | -54.58% |
| GDF15,PGPEP1            | 15.80%   | -54.54% |
| ARAP2                   | 83.28%   | -54.47% |
| PRDX6,AC108073.3        | 47.24%   | -54.38% |
| LCLAT1                  | 175.55%  | -54.20% |
| SPTY2D1                 | 297.33%  | -54.18% |
| GPR65                   | 164.23%  | -54.15% |
| NCALD,PLEKHG1,RP1-44A2  | 67.00%   | -54.11% |
| CXorf26                 | 55.68%   | -54.06% |
| CDC7                    | 273.46%  | -54.06% |
| AC005726.6              | 27.38%   | -54.03% |
| CHST11                  | 35.90%   | -54.02% |
| C17orf95                | 184.34%  | -54.01% |
| PSMC6,AC046176.13-1     | 162.84%  | -53.96% |
| AC073869.1,RAB6A,RAB6C  | 214.44%  | -53.87% |
| RP11-149B7.4,HIST1H2BN, | 21.79%   | -53.86% |
| RFK                     | 51.92%   | -53.72% |
| ZCCHC11                 | 46.20%   | -53.70% |
| PCMT1                   | 131.41%  | -53.57% |
| BLZF1                   | 91.98%   | -53.51% |
| CBX6                    | 13.39%   | -53.51% |
| AK3                     | 67.88%   | -53.45% |
| AKIRIN2                 | 79.40%   | -53.40% |
| GCN1L1                  | 27.48%   | -53.35% |
| HLA-DQB2,HLA-DQB2,HLA-  | 117.65%  | -53.32% |

|                          |          |         |
|--------------------------|----------|---------|
| FKBP1B,AC104665.2        | 13.89%   | -53.26% |
| AC073073.2-2,AL391261.3- | 109.59%  | -53.23% |
| CCNDBP1                  | 257.69%  | -53.23% |
| KPNA3                    | 64.85%   | -53.16% |
| CPA3                     | 515.88%  | -52.99% |
| CDC42SE2                 | 77.39%   | -52.94% |
| TOR1A                    | 45.18%   | -52.93% |
| LHFPL2                   | 22.37%   | -52.83% |
| PUM1                     | 89.98%   | -52.72% |
| NT5C2                    | 93.85%   | -52.69% |
| C7orf28A,C7orf28B        | 103.86%  | -52.67% |
| VAPA                     | 284.88%  | -52.66% |
| HOXC11                   | 44.04%   | -52.66% |
| RP5-1055C14.6,TMEM188    | 291.56%  | -52.50% |
| C1orf63                  | 103.91%  | -52.49% |
| C17orf63                 | 13.42%   | -52.38% |
| RPL13A                   | 46.12%   | -52.37% |
| MID1                     | 36.94%   | -52.37% |
| NRBP2                    | 78.85%   | -52.26% |
| C19orf22                 | 35.12%   | -52.17% |
| RPL26,AC022431.1,AC0788  | 88.14%   | -52.12% |
| FAM76B                   | 23.11%   | -52.11% |
| DPYSL2                   | 84.38%   | -52.01% |
| SEC14L1                  | 36.32%   | -51.95% |
| HSPE1,UBE2D2,CRTC3,CDH   | 88.34%   | -51.89% |
| CASP4                    | 116.80%  | -51.85% |
| PCBP1                    | 46.08%   | -51.81% |
| HLA-B,HLA-B,HLA-B,HLA-B, | 18.83%   | -51.64% |
| SNORA24                  | 129.77%  | -51.63% |
| AFF1                     | 259.28%  | -51.53% |
| COQ4                     | 87.01%   | -51.53% |
| CRYL1                    | 45.75%   | -51.50% |
| FTS,AC010342.5           | 44.30%   | -51.47% |
| NAP1L5                   | 903.28%  | -51.47% |
| HLCS                     | 55.77%   | -51.46% |
| DNAJC14                  | 47.72%   | -51.46% |
| C9orf9                   | 12.50%   | -51.23% |
| MAN2A1                   | 297.82%  | -51.15% |
| ZNF403                   | 32.29%   | -51.07% |
| SPG3A                    | 218.98%  | -51.06% |
| GPR98                    | 196.43%  | -51.00% |
| SLFN12                   | 161.37%  | -50.74% |
| SQLE                     | 1359.69% | -50.72% |
| PRCP                     | 664.71%  | -50.66% |
| AC010300.8,ZNF91,AC0245  | 206.56%  | -50.55% |
| LARS                     | 11.27%   | -50.55% |
| HOXB6                    | 88.30%   | -50.42% |

|                          |         |         |
|--------------------------|---------|---------|
| CMPK1                    | 155.65% | -50.39% |
| PLAGL2                   | 62.49%  | -50.38% |
| DPY19L1                  | 297.03% | -50.37% |
| LCP1                     | 89.27%  | -50.35% |
| ZNF330                   | 67.36%  | -50.33% |
| RP11-686D16.2,RPL5P6,RP  | 99.25%  | -50.31% |
| SRXN1,AL121758.24-1      | 262.85% | -50.30% |
| DHX9                     | 16.10%  | -50.25% |
| FNBP4                    | 165.32% | -50.16% |
| RAC1                     | 68.21%  | -50.15% |
| U52111.12,AF279873.4,AC  | 359.09% | -49.99% |
| PABPC3,PDS5A,PABPCP5     | 256.55% | -49.92% |
| ADAR                     | 48.02%  | -49.90% |
| DLG5                     | 35.96%  | -49.87% |
| EXOC2                    | 111.72% | -49.83% |
| KIAA0528                 | 22.20%  | -49.79% |
| TSPYL2                   | 45.47%  | -49.76% |
| COPA                     | 143.72% | -49.76% |
| ADNP2                    | 221.28% | -49.73% |
| SLC20A1                  | 187.14% | -49.65% |
| RPL10A,AC120036.5-2,RPL: | 21.33%  | -49.59% |
| POLR3G                   | 100.18% | -49.54% |
| C10orf4                  | 24.63%  | -49.53% |
| IRAK3                    | 16.45%  | -49.48% |
| DSTN                     | 130.70% | -49.43% |
| ETS2                     | 55.37%  | -49.23% |
| HERPUD2                  | 18.34%  | -49.22% |
| NDUFC1                   | 50.03%  | -49.22% |
| AC083841.9,C8orf55       | 20.70%  | -49.18% |
| ATF3                     | 87.84%  | -49.15% |
| RP11-156G14.1,ZFAND6     | 67.39%  | -49.11% |
| GBF1                     | 28.90%  | -49.10% |
| TIMM17A                  | 151.73% | -49.09% |
| C3orf23                  | 84.13%  | -49.09% |
| XPO4                     | 13.90%  | -49.08% |
| NOVA2                    | 56.56%  | -49.08% |
| CBLB                     | 24.38%  | -49.06% |
| AKR7A2                   | 12.57%  | -48.98% |
| AL162407.14              | 46.30%  | -48.97% |
| ANKRD50                  | 148.00% | -48.92% |
| RPL23A,RPL23AP38,HSD17   | 65.42%  | -48.82% |
| RNF125                   | 88.06%  | -48.80% |
| RPS13P2                  | 79.98%  | -48.74% |
| AC092070.2-2,NDUFV2      | 229.70% | -48.68% |
| RPS6                     | 33.25%  | -48.67% |
| EIF4EBP2                 | 41.54%  | -48.59% |
| AURKA                    | 30.68%  | -48.51% |

|                          |         |         |
|--------------------------|---------|---------|
| NDUFAB1                  | 132.67% | -48.49% |
| ETFA                     | 382.08% | -48.47% |
| NIPA2                    | 57.34%  | -48.45% |
| PPAPDC1B                 | 144.33% | -48.43% |
| AC106862.1,FAM115B       | 62.20%  | -48.42% |
| PEX13                    | 446.46% | -48.24% |
| EPRS                     | 323.60% | -48.24% |
| PARG                     | 171.58% | -48.22% |
| SPTLC2                   | 48.75%  | -48.18% |
| C17orf58                 | 505.47% | -48.13% |
| AC004066.1-2,EEF1A1,EEF: | 79.14%  | -48.12% |
| RBM23                    | 78.48%  | -48.11% |
| IMPAD1                   | 173.20% | -48.11% |
| RBM3                     | 451.00% | -48.09% |
| TRAM1L1                  | 80.18%  | -48.08% |
| BLOC1S2                  | 27.62%  | -48.07% |
| MAPK9                    | 191.79% | -48.01% |
| CD59                     | 21.48%  | -47.91% |
| EEF1E1,AC104651.1        | 406.71% | -47.89% |
| STXBP1                   | 91.78%  | -47.89% |
| C9orf5                   | 55.25%  | -47.88% |
| PECI                     | 58.99%  | -47.84% |
| PEX13                    | 209.45% | -47.75% |
| COPS2                    | 75.71%  | -47.64% |
| KCNH4                    | 34.04%  | -47.62% |
| C1orf25                  | 29.02%  | -47.57% |
| LYRM7                    | 100.30% | -47.50% |
| AC012467.9-1             | 699.15% | -47.50% |
| RP11-700P18.1            | 231.31% | -47.46% |
| HABP4                    | 67.27%  | -47.42% |
| TFB1M                    | 80.87%  | -47.33% |
| RIOK3                    | 75.29%  | -47.33% |
| PCNX                     | 172.12% | -47.27% |
| PER2                     | 774.55% | -47.09% |
| CPNE1                    | 106.15% | -47.01% |
| AC005332.1               | 79.89%  | -46.98% |
| C17orf71                 | 105.59% | -46.97% |
| ANKRD10                  | 378.73% | -46.90% |
| SLC12A6                  | 237.83% | -46.77% |
| DHX29                    | 66.99%  | -46.71% |
| ZNF217                   | 45.29%  | -46.62% |
| EIF1B                    | 40.47%  | -46.61% |
| ADI1                     | 52.47%  | -46.59% |
| POGK                     | 63.94%  | -46.54% |
| AFG3L2                   | 18.73%  | -46.44% |
| AL009183.10              | 161.76% | -46.32% |
| SCYL2                    | 967.86% | -46.32% |



|                       |         |         |
|-----------------------|---------|---------|
| AKAP13                | 195.53% | -46.29% |
| DYNLT1                | 42.28%  | -46.21% |
| DPYD                  | 303.00% | -46.21% |
| ARPC5                 | 271.32% | -46.14% |
| ISCU                  | 60.30%  | -46.09% |
| H3F3AP1               | 30.05%  | -46.06% |
| CNIH4                 | 179.61% | -46.04% |
| MEMO1,DPY30,AP000689. | 187.96% | -45.88% |
| CLNS1A                | 40.51%  | -45.81% |
| SMAD2                 | 17.88%  | -45.74% |
| SLC25A13              | 54.35%  | -45.63% |
| C12orf68              | 102.91% | -45.63% |
| COL4A1                | 331.04% | -45.62% |
| SUB1,AC069185.7       | 125.99% | -45.61% |
| SF3B3                 | 39.33%  | -45.59% |
| WDR26                 | 84.63%  | -45.57% |
| GLO1                  | 363.38% | -45.45% |
| ITK                   | 83.73%  | -45.40% |
| IRAK2                 | 82.10%  | -45.39% |
| SERBP1                | 53.62%  | -45.34% |
| GSTA4                 | 104.04% | -45.33% |
| RAB21                 | 33.56%  | -45.20% |
| CBX5                  | 43.15%  | -45.13% |
| RBL2                  | 21.74%  | -45.12% |
| VPS24                 | 41.46%  | -45.12% |
| FAM120B               | 14.69%  | -45.11% |
| RNF130                | 49.69%  | -45.08% |
| ANP32B                | 25.34%  | -45.07% |
| UCHL1                 | 43.65%  | -45.02% |
| MYL12A                | 62.76%  | -45.00% |
| EIF2AK3               | 985.21% | -44.96% |
| POLG2                 | 16.59%  | -44.92% |
| CDKN3                 | 277.58% | -44.89% |
| ICMT                  | 26.64%  | -44.82% |
| PUM1                  | 168.06% | -44.81% |
| NR2C2                 | 18.44%  | -44.78% |
| CYP51A1               | 136.80% | -44.76% |
| ZNF583                | 330.01% | -44.63% |
| R3HDM1                | 169.39% | -44.59% |
| ARFGAP3               | 192.18% | -44.58% |
| TMEM106B              | 135.09% | -44.55% |
| ITM2B                 | 179.15% | -44.43% |
| NUPL2                 | 59.52%  | -44.35% |
| RBBP8                 | 454.85% | -44.10% |
| FOSB                  | 368.70% | -44.10% |
| AC087499.3,MEIS3P1    | 147.97% | -43.96% |
| PLEKHA1               | 143.82% | -43.95% |

|                         |          |         |
|-------------------------|----------|---------|
| UTP11L                  | 79.98%   | -43.92% |
| PMEPA1                  | 76.53%   | -43.92% |
| NDUFB4,AC015726.1       | 104.62%  | -43.82% |
| RIPX                    | 58.41%   | -43.81% |
| C5orf37                 | 18.30%   | -43.81% |
| MAPK1IP1L               | 316.71%  | -43.79% |
| ORMDL1                  | 111.87%  | -43.70% |
| COL6A3                  | 41.04%   | -43.69% |
| SERP1                   | 416.30%  | -43.63% |
| GNB4                    | 87.17%   | -43.61% |
| ETF1                    | 453.54%  | -43.60% |
| AC121253.1,RP11-162D16. | 12.79%   | -43.50% |
| SV2B                    | 87.24%   | -43.29% |
| RP4-781K5.4             | 114.65%  | -43.28% |
| NMI                     | 257.39%  | -43.24% |
| RP11-160H22.1           | 634.86%  | -43.23% |
| ACBD3                   | 198.56%  | -43.16% |
| TRIM24                  | 659.34%  | -43.13% |
| RP11-124L5.7            | 37.64%   | -43.11% |
| PIWIL4                  | 39.39%   | -43.09% |
| C14orf166               | 52.71%   | -43.05% |
| ARRDC3                  | 402.39%  | -43.04% |
| HMG3                    | 385.45%  | -43.04% |
| KANK1                   | 112.93%  | -43.04% |
| ERGIC2                  | 331.99%  | -43.02% |
| VAPB                    | 12.77%   | -42.97% |
| AREGB,AREG              | 1881.42% | -42.97% |
| MYLK3                   | 24.60%   | -42.96% |
| FH                      | 165.77%  | -42.91% |
| ATP1B3,AC012498.10-1    | 1998.65% | -42.79% |
| C3AR1                   | 166.17%  | -42.78% |
| HACE1                   | 140.28%  | -42.75% |
| ZNF295                  | 159.35%  | -42.74% |
| SNAP29                  | 116.35%  | -42.61% |
| CD83                    | 672.89%  | -42.54% |
| MPP1                    | 190.68%  | -42.51% |
| ATP6V0A2                | 43.89%   | -42.49% |
| KIAA0101                | 127.04%  | -42.47% |
| BICC1                   | 17.90%   | -42.47% |
| SLC31A2                 | 37.25%   | -42.44% |
| MDH1                    | 174.62%  | -42.32% |
| EAF2                    | 189.07%  | -42.32% |
| DECR1                   | 57.89%   | -42.25% |
| DNTTIP2                 | 133.64%  | -42.20% |
| NGLY1                   | 308.94%  | -42.17% |
| CLINT1                  | 414.06%  | -42.09% |
| MAP4K3                  | 615.84%  | -42.08% |

|                          |         |         |
|--------------------------|---------|---------|
| BAT2D1                   | 179.59% | -42.02% |
| AC018639.8-1             | 14.86%  | -41.99% |
| AC008443.10              | 129.53% | -41.99% |
| NAPG                     | 17.70%  | -41.96% |
| LASS2                    | 34.35%  | -41.95% |
| RP11-115M6.4,MPP1,HMG    | 106.28% | -41.88% |
| CCRL2                    | 171.82% | -41.87% |
| ALDH5A1                  | 348.45% | -41.83% |
| STX7                     | 19.57%  | -41.82% |
| AC104164.2-2,TMED2       | 259.70% | -41.82% |
| KCNAB3                   | 55.62%  | -41.79% |
| RPA1                     | 65.09%  | -41.68% |
| C14orf45                 | 518.95% | -41.67% |
| FAM113B                  | 11.80%  | -41.64% |
| CBX3                     | 20.09%  | -41.62% |
| DSCR1                    | 329.17% | -41.57% |
| AC104655.3               | 55.57%  | -41.47% |
| CDO1                     | 45.70%  | -41.46% |
| LPGAT1                   | 298.90% | -41.38% |
| TARS                     | 251.00% | -41.22% |
| BXDC2                    | 127.81% | -41.17% |
| NFIA                     | 331.36% | -40.99% |
| COLEC12                  | 333.33% | -40.97% |
| ARL8B                    | 88.05%  | -40.89% |
| CXCR7                    | 30.94%  | -40.84% |
| CDKN1B                   | 692.55% | -40.80% |
| RP11-402L1.1,LHX4,CAP1,F | 93.68%  | -40.79% |
| C2orf56                  | 49.36%  | -40.73% |
| UBE4B                    | 202.98% | -40.67% |
| PIK3R1                   | 117.45% | -40.64% |
| ACAT1                    | 102.86% | -40.44% |
| CEP192                   | 56.16%  | -40.44% |
| PSMD5                    | 101.49% | -40.39% |
| FGFR1OP                  | 42.58%  | -40.27% |
| RHOA                     | 100.12% | -40.27% |
| GFPT1                    | 81.77%  | -40.26% |
| SRP14P1,SRP14            | 87.74%  | -40.21% |
| IKBKB                    | 22.99%  | -40.14% |
| CCDC53                   | 534.50% | -40.13% |
| ANUBL1                   | 26.28%  | -40.10% |
| SEPT3                    | 71.11%  | -40.09% |
| ITGAE                    | 57.67%  | -40.08% |
| ALDH3B1                  | 17.83%  | -40.01% |
| AC003003.4               | 55.27%  | -39.95% |
| LIG3                     | 34.95%  | -39.94% |
| CCDC127                  | 35.98%  | -39.92% |
| PALLD                    | 183.72% | -39.82% |

|                       |          |         |
|-----------------------|----------|---------|
| TIPRL                 | 97.45%   | -39.82% |
| AP000926.6-2          | 46.84%   | -39.78% |
| TMEM97                | 100.23%  | -39.75% |
| AC112484.8-1          | 65.69%   | -39.75% |
| FGFRL1                | 37.30%   | -39.72% |
| ARL3                  | 45.12%   | -39.69% |
| SKIV2L2               | 43.94%   | -39.68% |
| USP36                 | 96.56%   | -39.65% |
| ZFP91                 | 94.52%   | -39.61% |
| B3GALT1               | 133.46%  | -39.45% |
| SIPA1L2               | 194.77%  | -39.45% |
| CCDC6                 | 11.43%   | -39.43% |
| MED17                 | 22.39%   | -39.43% |
| ERMP1                 | 554.56%  | -39.43% |
| IQCG                  | 50.38%   | -39.42% |
| AC005412.8,CLIC2,TWF1 | 30.27%   | -39.41% |
| RPIA                  | 72.01%   | -39.36% |
| TCP10L                | 46.73%   | -39.30% |
| BTG3                  | 241.23%  | -39.25% |
| HDGF,RP4-765F13.3     | 43.62%   | -39.24% |
| SLC10A7               | 54.86%   | -39.24% |
| ELF2                  | 37.09%   | -39.23% |
| IKZF5                 | 223.39%  | -39.15% |
| CALM1                 | 144.77%  | -39.12% |
| ENDOD1                | 227.33%  | -39.08% |
| NCRNA00152,AC068491.1 | 44.81%   | -39.08% |
| TFRC                  | 186.61%  | -39.06% |
| ERN1                  | 43.48%   | -39.02% |
| DHRS7                 | 433.25%  | -38.99% |
| BSN                   | 55.60%   | -38.97% |
| CLK1                  | 769.52%  | -38.93% |
| AL136531.16           | 103.70%  | -38.91% |
| LDOC1L                | 27.56%   | -38.90% |
| ZNF207                | 63.32%   | -38.88% |
| C6orf89               | 65.18%   | -38.81% |
| KLHL28                | 762.71%  | -38.77% |
| TFDP1                 | 194.34%  | -38.75% |
| GCA                   | 87.55%   | -38.72% |
| ELOVL5                | 36.79%   | -38.71% |
| ST3GAL6               | 1255.43% | -38.71% |
| SUCLG2                | 158.82%  | -38.68% |
| DBI                   | 13.70%   | -38.67% |
| AC008073.5            | 51.79%   | -38.66% |
| WDR48                 | 22.27%   | -38.57% |
| UBE2A                 | 225.53%  | -38.51% |
| PSMA2                 | 154.11%  | -38.48% |
| RNMT                  | 70.08%   | -38.39% |

|                         |          |         |
|-------------------------|----------|---------|
| CNOT2                   | 235.68%  | -38.27% |
| NP                      | 104.11%  | -38.22% |
| PSMD10                  | 299.48%  | -38.20% |
| FNTB                    | 139.25%  | -38.13% |
| DPP4                    | 26.76%   | -38.06% |
| USO1                    | 53.41%   | -38.02% |
| MARS2,AC011997.1        | 192.73%  | -38.01% |
| LANCL1                  | 195.10%  | -37.99% |
| CHI3L1                  | 43.65%   | -37.89% |
| AL022345.4,EIF3EIP      | 84.47%   | -37.85% |
| XPO1                    | 97.75%   | -37.77% |
| SLC39A10                | 78.68%   | -37.76% |
| CELSR2                  | 109.53%  | -37.71% |
| C11orf10                | 49.95%   | -37.67% |
| RP11-379J5.2            | 105.16%  | -37.67% |
| GLTPD1                  | 57.84%   | -37.64% |
| UTP14C                  | 26.11%   | -37.59% |
| CD9                     | 75.23%   | -37.58% |
| USP34                   | 67.94%   | -37.55% |
| NKTR                    | 34.86%   | -37.51% |
| GTF2H1,AC090771.4-1,ACC | 35.23%   | -37.50% |
| LAMB1                   | 93.46%   | -37.32% |
| DDX5                    | 400.41%  | -37.24% |
| IL6                     | 329.22%  | -37.22% |
| TUBB2A                  | 281.10%  | -37.20% |
| RP11-212D3.3,RP11-212D3 | 100.72%  | -37.19% |
| AGRN                    | 14.35%   | -37.18% |
| MRFAP1                  | 71.41%   | -37.16% |
| SMYD2                   | 14.72%   | -37.14% |
| CCDC109B,CCDC13,AC0735  | 511.05%  | -37.06% |
| RPS16P10                | 66.93%   | -37.06% |
| DYNC1H1                 | 15.05%   | -37.04% |
| GLCCI1                  | 75.63%   | -37.03% |
| INHBA,AC005027.3        | 692.74%  | -36.94% |
| C3orf14                 | 120.57%  | -36.89% |
| DYNC2H1                 | 79.23%   | -36.84% |
| PRKCZ                   | 17.95%   | -36.80% |
| CPPED1                  | 142.78%  | -36.80% |
| ZNF117                  | 39.22%   | -36.75% |
| BTA1F1                  | 1017.36% | -36.75% |
| MRPS22                  | 27.88%   | -36.72% |
| TLN2                    | 40.65%   | -36.71% |
| SLC38A1                 | 108.53%  | -36.70% |
| FNBP1L                  | 463.82%  | -36.70% |
| TMEM109                 | 16.16%   | -36.67% |
| ZFP36L1                 | 24.20%   | -36.65% |
| CMAS                    | 43.42%   | -36.65% |

|                         |           |         |
|-------------------------|-----------|---------|
| GGCT,AC005154.6         | 52.81%    | -36.57% |
| VPS29                   | 103.63%   | -36.52% |
| BTK                     | 12.27%    | -36.50% |
| LYPLAL1                 | 624.76%   | -36.49% |
| RP9P,RP9                | 76.06%    | -36.47% |
| IGFALS                  | 40.55%    | -36.39% |
| LDOC1                   | 42.32%    | -36.39% |
| RRAGA                   | 58.31%    | -36.32% |
| RPS23                   | 132.85%   | -36.17% |
| KIAA1462                | 395.73%   | -36.12% |
| GDAP2                   | 74.71%    | -35.99% |
| MCPH1                   | 27.63%    | -35.98% |
| GPATCH2                 | 624.78%   | -35.96% |
| RABGGTB                 | 23.53%    | -35.95% |
| AC024082.3,DERL2        | 148.32%   | -35.95% |
| ME1                     | 85.83%    | -35.91% |
| CMAS                    | 68.63%    | -35.88% |
| TMEM66                  | 87.75%    | -35.85% |
| CASP6                   | 178.36%   | -35.84% |
| RPGRIP1L                | 67.99%    | -35.74% |
| PSMC2                   | 56.02%    | -35.72% |
| NRBF2                   | 40.22%    | -35.70% |
| DDX24                   | 179.27%   | -35.67% |
| USP38                   | 225.25%   | -35.62% |
| PRPF39                  | 236.67%   | -35.53% |
| AC133919.3-2,AC002055.4 | 93.67%    | -35.46% |
| TLE1                    | 12.74%    | -35.42% |
| AC005301.5              | 73.11%    | -35.42% |
| HERC1                   | 37.03%    | -35.38% |
| AC012607.8              | 28.67%    | -35.34% |
| CCL5                    | 20.73%    | -35.29% |
| GNG2                    | 57800.00% | -35.23% |
| LEO1                    | 295.00%   | -35.22% |
| PFAS                    | 22.02%    | -35.17% |
| EIF4G3                  | 47.98%    | -35.14% |
| IMPA1                   | 304.30%   | -35.11% |
| KDELR2,DAGLB            | 95.07%    | -35.10% |
| ZNF410                  | 73.07%    | -35.07% |
| TFCP2                   | 22.78%    | -35.06% |
| VHL                     | 65.95%    | -35.05% |
| RHBDF2                  | 30.75%    | -35.02% |
| PPP1CC                  | 162.77%   | -34.98% |
| ITPKB                   | 61.86%    | -34.96% |
| RPL36AL                 | 11.07%    | -34.92% |
| GNPDA1                  | 81.46%    | -34.80% |
| PSMD1                   | 60.41%    | -34.72% |
| BRWD1                   | 32.43%    | -34.70% |

|                          |         |         |
|--------------------------|---------|---------|
| FAM162A                  | 85.29%  | -34.68% |
| DUSP8                    | 50.02%  | -34.67% |
| IDI1                     | 166.88% | -34.65% |
| MARCH7                   | 56.27%  | -34.64% |
| SNX4                     | 228.72% | -34.63% |
| APLP2                    | 16.53%  | -34.63% |
| C6orf62                  | 247.44% | -34.63% |
| C1orf128                 | 59.60%  | -34.54% |
| HARS                     | 431.98% | -34.54% |
| RP11-367H5.8,RP11-543B1  | 31.58%  | -34.53% |
| PCID2                    | 40.25%  | -34.37% |
| C15orf15,TTC37,RP11-746F | 48.74%  | -34.29% |
| AC012100.1               | 113.39% | -34.27% |
| TNFRSF21                 | 55.64%  | -34.25% |
| MAP1B                    | 117.10% | -34.25% |
| ARPC2                    | 53.74%  | -34.22% |
| GPBP1L1                  | 54.10%  | -34.22% |
| ARHGEF10                 | 18.44%  | -34.12% |
| PHKB                     | 123.90% | -34.03% |
| FDFT1                    | 12.57%  | -33.95% |
| NAP1L1                   | 189.09% | -33.90% |
| ENPEP                    | 160.55% | -33.80% |
| SLC38A3                  | 20.69%  | -33.80% |
| NCAPD2                   | 75.82%  | -33.77% |
| IFNB1                    | 15.36%  | -33.70% |
| C1orf198                 | 54.43%  | -33.70% |
| ACSM3                    | 33.16%  | -33.66% |
| LYAR                     | 274.09% | -33.66% |
| CDC123                   | 16.72%  | -33.66% |
| PNRC2,AL390877.1,BX511C  | 193.01% | -33.52% |
| GNA13                    | 502.90% | -33.47% |
| BTN3A2                   | 107.97% | -33.40% |
| SLC29A1                  | 126.12% | -33.31% |
| CREB1                    | 154.87% | -33.29% |
| ODC1                     | 102.16% | -33.28% |
| CANX                     | 132.35% | -33.25% |
| CASK                     | 55.61%  | -33.23% |
| RAB3GAP1                 | 78.60%  | -33.15% |
| YLPM1                    | 32.22%  | -33.14% |
| VPS4B                    | 25.28%  | -33.11% |
| MRPL15                   | 120.97% | -33.05% |
| KIAA1128                 | 365.87% | -33.02% |
| ALDH1A1                  | 364.58% | -32.98% |
| IL18R1,IL1RL1            | 660.52% | -32.95% |
| CENPE                    | 109.93% | -32.77% |
| AP006216.9               | 278.13% | -32.76% |
| PMPCB                    | 74.65%  | -32.66% |

|                          |         |         |
|--------------------------|---------|---------|
| PDHA1                    | 55.75%  | -32.61% |
| TMEM38B                  | 42.39%  | -32.61% |
| AC073073.2-2,AL391261.3- | 138.89% | -32.56% |
| MOBK1A                   | 31.92%  | -32.52% |
| TLR7                     | 144.91% | -32.51% |
| RPL26P12                 | 69.80%  | -32.39% |
| AC139769.1,COMMD1        | 23.50%  | -32.36% |
| CYB5B                    | 60.44%  | -32.34% |
| NSL1                     | 142.65% | -32.31% |
| RP5-872K7.2              | 46.06%  | -32.31% |
| COPB2                    | 164.90% | -32.28% |
| TSPAN6                   | 22.28%  | -32.25% |
| AC110814.2               | 42.87%  | -32.17% |
| GSPT2                    | 21.66%  | -32.15% |
| NAGA                     | 64.17%  | -32.14% |
| ATXN10                   | 48.33%  | -32.12% |
| UCK2                     | 46.07%  | -32.12% |
| DCUN1D4                  | 120.51% | -32.07% |
| HYLS1                    | 41.97%  | -32.03% |
| TOB2                     | 492.94% | -32.02% |
| SLC35B1                  | 38.49%  | -31.97% |
| PLCL1                    | 22.75%  | -31.95% |
| ZNF776                   | 48.74%  | -31.92% |
| TUBB,TUBB,TUBB,TUBB,TU   | 12.54%  | -31.89% |
| AC004490.1,LSM7          | 19.05%  | -31.87% |
| VAMP7                    | 322.41% | -31.85% |
| PPFIA1                   | 240.00% | -31.83% |
| RP11-220D10.1,RP4-778K6  | 49.19%  | -31.83% |
| PLEKHC1                  | 221.43% | -31.82% |
| CHN2                     | 74.00%  | -31.80% |
| KLHL28                   | 103.15% | -31.78% |
| LPIN1                    | 247.75% | -31.77% |
| AL139093.11              | 46.14%  | -31.73% |
| MEIS2                    | 129.74% | -31.69% |
| VCL                      | 38.63%  | -31.66% |
| RPS6KC1                  | 63.95%  | -31.64% |
| BMPR1B                   | 24.46%  | -31.61% |
| ZFAND1                   | 23.85%  | -31.59% |
| SCP2                     | 334.52% | -31.58% |
| GNE                      | 41.38%  | -31.50% |
| SEC11L3                  | 171.60% | -31.47% |
| CREB1                    | 66.79%  | -31.46% |
| SS18                     | 57.77%  | -31.44% |
| C14orf162                | 53.12%  | -31.43% |
| MKRN2                    | 111.95% | -31.39% |
| MGST3                    | 286.13% | -31.38% |
| MKLN1                    | 124.73% | -31.30% |



|                          |          |         |
|--------------------------|----------|---------|
| CGGBP1                   | 173.18%  | -31.27% |
| SLC22A17                 | 20.99%   | -31.26% |
| HP                       | 200.00%  | -31.23% |
| BRPF3                    | 60.43%   | -31.20% |
| PPARA                    | 23.86%   | -31.12% |
| RNF11                    | 126.01%  | -31.10% |
| COMMD1                   | 31.91%   | -31.09% |
| AC019084.9,FAM62B        | 715.65%  | -31.02% |
| SFRS2B                   | 73.31%   | -30.99% |
| TP53BP2                  | 1211.69% | -30.99% |
| TM2D2                    | 28.39%   | -30.93% |
| DLC1                     | 234.76%  | -30.90% |
| MAPRE1                   | 90.09%   | -30.90% |
| PSMD7                    | 112.27%  | -30.86% |
| NPIP,AC126755.3-1,AC137: | 13.39%   | -30.86% |
| LAMC1                    | 165.37%  | -30.83% |
| C1orf69                  | 88.55%   | -30.83% |
| RHBDD1                   | 40.98%   | -30.81% |
| ARHGEF3                  | 197.46%  | -30.79% |
| SLA                      | 16.04%   | -30.78% |
| YARS2                    | 122.97%  | -30.75% |
| RP11-490G2.1             | 1760.53% | -30.69% |
| C6orf49,TOMM6            | 14.03%   | -30.66% |
| EVC                      | 40.18%   | -30.62% |
| AC019016.7,CSNK1A1,ACO:  | 282.69%  | -30.50% |
| RHEB,FAM35B2,RP11-575L   | 181.81%  | -30.46% |
| JAZF1                    | 203.79%  | -30.39% |
| RAD51L1                  | 96.74%   | -30.39% |
| LIF                      | 158.04%  | -30.35% |
| KIAA0355                 | 22.20%   | -30.27% |
| LIN52                    | 173.85%  | -30.27% |
| SKAP1                    | 198.53%  | -30.25% |
| CDS2                     | 28.79%   | -30.21% |
| AC009362.2,MKLN1,AL049   | 13.43%   | -30.20% |
| C17orf91                 | 566.27%  | -30.20% |
| DOPEY1                   | 178.45%  | -30.19% |
| ACP1,RP11-301G21.1       | 55.69%   | -30.12% |
| NPL                      | 19.26%   | -30.07% |
| TRIM39,TRIM39,TRIM39,Tf  | 36.18%   | -30.06% |
| SLC6A8                   | 16.17%   | -30.01% |
| AC083899.3,ANAPC1        | 17.20%   | -29.97% |
| COX7                     | 44.94%   | -29.93% |
| CCT2                     | 130.90%  | -29.93% |
| CHSY1                    | 99.90%   | -29.89% |
| CHPF                     | 21.64%   | -29.87% |
| GLT25D2                  | 29.35%   | -29.80% |
| APEX1                    | 91.02%   | -29.79% |

|                          |          |         |
|--------------------------|----------|---------|
| MFSD1                    | 244.39%  | -29.74% |
| UBE2H                    | 119.77%  | -29.63% |
| AMY2B,AMYP1              | 164.53%  | -29.55% |
| C4orf14                  | 44.64%   | -29.47% |
| LYRM1                    | 39.76%   | -29.47% |
| ZYX                      | 23.06%   | -29.41% |
| NTS                      | 382.43%  | -29.40% |
| ASH2L                    | 21.48%   | -29.37% |
| EXOSC6                   | 18.52%   | -29.33% |
| LRIG1                    | 87.53%   | -29.33% |
| MAP3K7IP3                | 95.97%   | -29.31% |
| HARS2                    | 51.07%   | -29.27% |
| SMARCC1                  | 270.93%  | -29.24% |
| BMP2K                    | 123.99%  | -29.22% |
| CHMP5                    | 22.87%   | -29.16% |
| PSMA5                    | 96.04%   | -29.14% |
| EIF5A2                   | 62.72%   | -29.14% |
| ALPK1                    | 126.52%  | -29.07% |
| PABPC3,PABPCP5           | 108.45%  | -29.03% |
| VCL                      | 51.21%   | -28.99% |
| SNX3                     | 266.39%  | -28.99% |
| ZNF14                    | 32.39%   | -28.98% |
| PDGFRA                   | 400.37%  | -28.90% |
| EIF4A3                   | 65.23%   | -28.71% |
| TNF,TNF,TNF,TNF,TNF,TNF, | 82.44%   | -28.69% |
| PI4KA,KB-1183D5.9,E2F6   | 39.18%   | -28.64% |
| SPRYD4                   | 25.46%   | -28.64% |
| OTUD6A                   | 58.31%   | -28.63% |
| NR2F1                    | 20.86%   | -28.61% |
| AC009090.12              | 37.01%   | -28.59% |
| RP1-232L22__B.1,GK       | 1077.61% | -28.58% |
| CHGB                     | 178.02%  | -28.58% |
| ATP6V1H                  | 122.08%  | -28.57% |
| IGSF22                   | 48.03%   | -28.44% |
| NECAP1                   | 324.83%  | -28.44% |
| ADCY7                    | 376.58%  | -28.42% |
| CCL2                     | 343.68%  | -28.40% |
| IDH1                     | 195.08%  | -28.37% |
| BACH1                    | 1164.23% | -28.32% |
| ZNF225,ZNF230            | 440.06%  | -28.30% |
| MARS                     | 144.37%  | -28.28% |
| CASP2                    | 70.39%   | -28.19% |
| PHACTR4                  | 35.63%   | -28.17% |
| AC025177.5               | 37.17%   | -28.15% |
| MYLIP                    | 51.69%   | -28.14% |
| HEXIM1                   | 224.24%  | -28.08% |
| DNM3                     | 42.73%   | -28.07% |

|                         |         |         |
|-------------------------|---------|---------|
| DENND5B                 | 96.54%  | -28.01% |
| ARHGAP9                 | 23.76%  | -27.98% |
| AC139337.5-1,PROS1      | 147.39% | -27.86% |
| ENC1                    | 341.20% | -27.85% |
| RAD23B                  | 103.60% | -27.81% |
| FGR                     | 31.62%  | -27.79% |
| COQ10B                  | 35.76%  | -27.77% |
| SLC33A1                 | 181.30% | -27.76% |
| GRHPR                   | 24.81%  | -27.74% |
| PANK2                   | 88.01%  | -27.68% |
| MYO6                    | 10.30%  | -27.63% |
| TXNRD1                  | 498.14% | -27.62% |
| PDPR                    | 24.23%  | -27.62% |
| C11orf41                | 16.32%  | -27.52% |
| HNRNPU                  | 19.89%  | -27.50% |
| UHRF1BP1L               | 43.89%  | -27.47% |
| RRN3                    | 38.30%  | -27.44% |
| SUV420H1                | 10.75%  | -27.39% |
| TRPS1                   | 111.63% | -27.37% |
| PTPRC                   | 154.86% | -27.34% |
| DFNA5                   | 55.32%  | -27.27% |
| C11orf54                | 119.69% | -27.26% |
| TSC1                    | 90.11%  | -27.20% |
| NFYC                    | 42.98%  | -27.17% |
| MESDC1                  | 627.81% | -27.15% |
| BZW2                    | 25.63%  | -27.14% |
| CAPZA1                  | 67.15%  | -27.11% |
| RP11-307E17.2,VDAC1     | 210.35% | -27.04% |
| TPK1                    | 277.60% | -27.03% |
| MED8                    | 76.10%  | -26.94% |
| PANK3                   | 30.13%  | -26.92% |
| RNF149                  | 329.59% | -26.92% |
| KDM5A                   | 164.85% | -26.89% |
| JAGN1                   | 200.86% | -26.87% |
| TMEM126A                | 375.89% | -26.87% |
| KRT75                   | 31.21%  | -26.78% |
| HIAT1                   | 83.68%  | -26.74% |
| UGCGL2                  | 92.09%  | -26.69% |
| ANXA3                   | 101.92% | -26.67% |
| PLEKHA8,PLEKHA9         | 13.83%  | -26.65% |
| ZCCHC9                  | 154.58% | -26.61% |
| PREP                    | 27.50%  | -26.59% |
| NCOA3                   | 90.11%  | -26.54% |
| ZC3H12A,AC005237.2      | 47.47%  | -26.52% |
| FAAH                    | 26.85%  | -26.46% |
| AC145285.2-2,AC092375.4 | 82.40%  | -26.41% |
| KCTD7,RP4-756H11.3      | 190.11% | -26.40% |

|                            |         |         |
|----------------------------|---------|---------|
| TIMM8B                     | 33.60%  | -26.36% |
| DENND1A                    | 65.68%  | -26.36% |
| CDKN2C                     | 47.91%  | -26.22% |
| ANGPTL1                    | 32.18%  | -26.22% |
| CD1B                       | 37.60%  | -26.12% |
| DLEU1                      | 75.75%  | -26.09% |
| AC009108.10                | 62.79%  | -25.86% |
| ATG4A                      | 85.52%  | -25.83% |
| TPR                        | 137.97% | -25.79% |
| SOCS6                      | 134.80% | -25.76% |
| OTOR                       | 87.99%  | -25.75% |
| GPR182                     | 26.18%  | -25.59% |
| PLEKHB2                    | 41.68%  | -25.56% |
| PTPRB                      | 372.56% | -25.56% |
| BPGM                       | 75.22%  | -25.55% |
| TMEM159                    | 34.67%  | -25.53% |
| CNTLN                      | 28.45%  | -25.49% |
| KCNJ1                      | 24.45%  | -25.44% |
| DCDC1,RP11-235D19.3,CYC    | 241.88% | -25.42% |
| RP11-35L17.2               | 84.25%  | -25.36% |
| AC078819.24-1,AC012085.    | 119.26% | -25.35% |
| CALB2                      | 127.01% | -25.33% |
| MOXD1                      | 65.00%  | -25.32% |
| NCSTN                      | 52.78%  | -25.31% |
| FUCA1                      | 202.91% | -25.30% |
| SLC35A3                    | 148.84% | -25.29% |
| SYT15                      | 71.71%  | -25.29% |
| CAMSAP1L1                  | 32.44%  | -25.26% |
| FAM91A1                    | 975.00% | -25.25% |
| CAB39                      | 40.97%  | -25.25% |
| KLHL18                     | 234.78% | -25.24% |
| hsa-mir-23a,hsa-mir-27a,h: | 18.21%  | -25.19% |
| PRKAG1                     | 90.69%  | -25.16% |
| PEX7                       | 66.41%  | -25.12% |
| HSP90AB1,HSP90AB3P         | 171.64% | -25.10% |
| ZFYVE1                     | 23.59%  | -24.96% |
| ATP10A                     | 79.38%  | -24.96% |
| PODXL                      | 26.33%  | -24.92% |
| HADHA                      | 41.61%  | -24.90% |
| UNC5CL                     | 15.15%  | -24.87% |
| NUDT4P1                    | 160.08% | -24.81% |
| PAPD4                      | 19.85%  | -24.77% |
| SRGN                       | 109.98% | -24.77% |
| PRKCI                      | 58.94%  | -24.72% |
| ACADSB                     | 27.10%  | -24.72% |
| NDRG1                      | 24.61%  | -24.64% |
| MALAT1                     | 217.75% | -24.64% |

|                          |          |         |
|--------------------------|----------|---------|
| STAMBP                   | 40.96%   | -24.61% |
| DR1                      | 160.53%  | -24.57% |
| SNORD58B                 | 79.82%   | -24.56% |
| OSGEP                    | 109.86%  | -24.48% |
| BAG1                     | 85.46%   | -24.47% |
| PGRMC1                   | 190.75%  | -24.46% |
| PREPL                    | 32.42%   | -24.41% |
| NUDT4P1                  | 16.69%   | -24.41% |
| RNF38                    | 97.10%   | -24.36% |
| RILPL2                   | 105.49%  | -24.33% |
| PHF20L1                  | 81.45%   | -24.31% |
| ABI3BP                   | 14.18%   | -24.25% |
| HSD17B4                  | 98.48%   | -24.20% |
| DENND1A                  | 26.59%   | -24.19% |
| AP005668.2               | 16.99%   | -24.13% |
| QPCT                     | 164.43%  | -24.12% |
| ACSL4                    | 428.78%  | -24.11% |
| PSAT1                    | 78.14%   | -24.05% |
| MAP1LC3B                 | 39.36%   | -24.01% |
| WDR47                    | 663.56%  | -23.97% |
| ADSS                     | 17.65%   | -23.90% |
| NCDN                     | 13.44%   | -23.89% |
| PCSK9                    | 13.25%   | -23.84% |
| GOLGA7                   | 46.69%   | -23.83% |
| FBN2                     | 240.80%  | -23.80% |
| ZNF576                   | 46.64%   | -23.75% |
| AC138940.3-2,RP1-9B16.2, | 57.39%   | -23.67% |
| PRPF38A,RP11-390B4.4     | 148.13%  | -23.67% |
| PPIL5                    | 169.97%  | -23.62% |
| PRRT1,PRRT1,PRRT1,PRRT1  | 30.89%   | -23.60% |
| HNRNPF                   | 25.89%   | -23.59% |
| JUP                      | 48.83%   | -23.59% |
| MCTS1                    | 91.45%   | -23.53% |
| MAML1                    | 35.35%   | -23.52% |
| STK24                    | 114.13%  | -23.50% |
| MASTL                    | 33.51%   | -23.49% |
| C20orf4                  | 53.21%   | -23.41% |
| C1orf9                   | 1229.69% | -23.38% |
| PLEKHG1,RP1-44A20.4,PDC  | 75.18%   | -23.38% |
| FCHSD2                   | 89.17%   | -23.35% |
| CTDSPL                   | 36.05%   | -23.29% |
| CLEC4G                   | 68.17%   | -23.26% |
| FCER1A                   | 112.97%  | -23.26% |
| SAMD8                    | 38.29%   | -23.14% |
| ADAMTS14                 | 53.68%   | -23.07% |
| SNORD58B,SNORD58         | 156.24%  | -23.04% |
| UBE3C                    | 42.40%   | -23.01% |

|                        |         |         |
|------------------------|---------|---------|
| HMGN1,AC091544.11-2,AC | 134.85% | -22.96% |
| PCBD1                  | 27.28%  | -22.93% |
| RNF39,RNF39,RNF39,RNF3 | 51.48%  | -22.91% |
| BCL2L13                | 61.84%  | -22.90% |
| C2orf15                | 24.19%  | -22.82% |
| ARHGAP21,RP11-296E7.1  | 80.82%  | -22.81% |
| PAFAH1B2               | 37.77%  | -22.72% |
| HEY1                   | 604.28% | -22.63% |
| BLMH                   | 23.13%  | -22.50% |
| NDUFA6                 | 69.04%  | -22.50% |
| PMCHL1,PMCHL2          | 94.82%  | -22.46% |
| TMEM9B                 | 139.58% | -22.45% |
| LIM2                   | 39.87%  | -22.40% |
| NDEL1                  | 256.53% | -22.40% |
| GOLGA8B                | 89.91%  | -22.40% |
| SMC6                   | 63.97%  | -22.39% |
| KIF17                  | 19.48%  | -22.36% |
| RPL15                  | 355.77% | -22.36% |
| C2orf76                | 309.44% | -22.28% |
| MGAT4B                 | 29.48%  | -22.28% |
| PEX6                   | 98.71%  | -22.25% |
| C20orf23               | 168.23% | -22.23% |
| BACE2                  | 40.93%  | -22.23% |
| C9orf163               | 54.95%  | -22.22% |
| AC021937.1,EXT1        | 678.79% | -22.18% |
| TTC39B                 | 46.38%  | -22.15% |
| C6orf138               | 11.71%  | -22.13% |
| FCER1G                 | 84.90%  | -22.10% |
| USMG5P1,USMG5          | 34.94%  | -22.07% |
| KCNQ3                  | 38.01%  | -22.06% |
| LYPD1                  | 36.18%  | -21.97% |
| SMOC1                  | 13.89%  | -21.95% |
| LCMT1                  | 110.07% | -21.94% |
| VPS24                  | 199.04% | -21.93% |
| FZD4                   | 39.96%  | -21.92% |
| C2orf30                | 359.58% | -21.91% |
| STX4                   | 85.15%  | -21.91% |
| AC010328.4,ARPC1A      | 120.33% | -21.88% |
| ANKRD42                | 424.21% | -21.82% |
| STT3B                  | 274.64% | -21.79% |
| FBXO11                 | 310.99% | -21.78% |
| CRYZ,RP11-17E13.3      | 469.89% | -21.78% |
| DNAH14                 | 56.27%  | -21.75% |
| GPNMB                  | 333.52% | -21.75% |
| SNTB1                  | 34.73%  | -21.74% |
| KIAA0430               | 117.21% | -21.74% |
| POLR2K                 | 189.47% | -21.71% |

|                        |          |         |
|------------------------|----------|---------|
| ARHGEF6                | 17.50%   | -21.66% |
| WNT2                   | 42.97%   | -21.65% |
| C5orf51                | 87.18%   | -21.64% |
| PHLDA2                 | 66.69%   | -21.61% |
| SNX27                  | 14.15%   | -21.59% |
| DLL3                   | 60.64%   | -21.58% |
| GLCE                   | 445.83%  | -21.55% |
| EYA3                   | 226.62%  | -21.47% |
| EIF3H                  | 595.35%  | -21.46% |
| MDFIC                  | 37.40%   | -21.41% |
| TTF1                   | 16.81%   | -21.40% |
| ZRANB1                 | 155.61%  | -21.39% |
| SAMM50,PNPLA3          | 43.93%   | -21.39% |
| ACAT1                  | 592.81%  | -21.35% |
| RP11-33N11.1,HNRNPD    | 33.69%   | -21.24% |
| CEBPD                  | 15.57%   | -21.20% |
| AC012379.7             | 87.97%   | -21.19% |
| AQP9                   | 118.68%  | -21.16% |
| BAZ1B                  | 87.10%   | -21.14% |
| ALDH1A3                | 62.60%   | -21.13% |
| AGPAT4                 | 60.98%   | -21.11% |
| ERH                    | 72.10%   | -21.10% |
| CCL2                   | 736.59%  | -21.08% |
| PIGA                   | 1180.04% | -21.01% |
| TINF2                  | 27.89%   | -20.92% |
| CCHCR1,CCHCR1,CCHCR1,C | 11.45%   | -20.90% |
| ST6GAL1                | 93.19%   | -20.86% |
| EXOSC7                 | 14.28%   | -20.81% |
| MAP4K4                 | 131.14%  | -20.79% |
| BANP                   | 36.33%   | -20.78% |
| ALS2CR4                | 99.75%   | -20.76% |
| TRIO                   | 145.13%  | -20.76% |
| PSMA2                  | 87.22%   | -20.75% |
| C1orf87                | 48.76%   | -20.74% |
| GOLT1B                 | 228.86%  | -20.73% |
| SPN,QPRT               | 228.57%  | -20.72% |
| TBK1                   | 178.86%  | -20.72% |
| OSBP                   | 22.07%   | -20.57% |
| GFI1B                  | 38.65%   | -20.56% |
| FUSIP1,BX511012.5-2    | 115.35%  | -20.54% |
| SMOX                   | 88.23%   | -20.53% |
| INSIG2                 | 130.79%  | -20.51% |
| BHLHE22                | 24.83%   | -20.50% |
| EXT1                   | 238.82%  | -20.49% |
| DDN                    | 51.01%   | -20.47% |
| MAST2                  | 17.19%   | -20.46% |
| HADHB                  | 77.95%   | -20.46% |

|                     |         |         |
|---------------------|---------|---------|
| MSH2                | 90.94%  | -20.44% |
| PLDN                | 188.31% | -20.40% |
| EHBP1               | 135.67% | -20.39% |
| SERPINA5            | 23.60%  | -20.33% |
| MID2                | 22.64%  | -20.33% |
| AC132812.9,KPNA2    | 93.83%  | -20.32% |
| ATP6V0D1            | 36.59%  | -20.26% |
| COL4A2              | 37.48%  | -20.26% |
| AC025181.8-1,MTMR12 | 67.96%  | -20.23% |
| C4orf18             | 64.69%  | -20.21% |
| PDE1B               | 42.78%  | -20.17% |
| CD99                | 22.91%  | -20.12% |
| PUM2,RP9P,RP9       | 41.67%  | -20.03% |
| MRPL3               | 10.43%  | -20.02% |
| DUSP16              | 102.37% | -20.02% |



Values represent mast cell genes upregulated by at least 10% by FceRI stimulation that were inhibited >20% by TGA (sorted most inhibited to least inhibited in column D)

| Gene_symbol | % Increase (-) to (+) | % Inhibition by TGA |
|-------------|-----------------------|---------------------|
| LECT1       | 10245.25%             | 98.86%              |
| PTBP2       | 1538.29%              | 98.49%              |
| ABCG5       | 4480.00%              | 96.94%              |
| KLF13       | 58.57%                | 96.06%              |
| NIT1        | 1913.64%              | 94.70%              |
| THOC4       | 77.17%                | 87.22%              |
| IRX4        | 1767.86%              | 86.42%              |
| FNDC3A      | 748.05%               | 85.60%              |
| ARF1        | 28.31%                | 84.89%              |
| RP4-604K5.1 | 1332.50%              | 84.82%              |
| FOXJ2       | 183.01%               | 83.95%              |
| CLASP1      | 22.70%                | 83.56%              |
| MARVELD3    | 270.87%               | 83.40%              |
| MELK        | 52.26%                | 83.30%              |
| ZMAT3       | 115.35%               | 82.98%              |
| PM20D2      | 70.42%                | 82.15%              |
| KNDC1       | 65.24%                | 81.69%              |
| N4BP2L1     | 53.96%                | 81.14%              |
| OTUB1       | 62.69%                | 78.96%              |
| GOLPH3      | 371.97%               | 78.87%              |
| NPAS2       | 36.06%                | 78.80%              |
| SLC3A2      | 77.56%                | 78.56%              |
| IFI6        | 319.76%               | 76.98%              |
| MAP2K5      | 91.53%                | 75.51%              |
| TNFSF14     | 1125.00%              | 75.34%              |
| MTMR15      | 133.72%               | 75.29%              |
| CALU        | 476.10%               | 75.17%              |
| RTN3        | 32.37%                | 73.23%              |
| CSE1L       | 99.60%                | 73.15%              |
| TNFAIP1     | 196.99%               | 73.11%              |
| NAPB        | 110.92%               | 73.08%              |
| SNIP1       | 117.59%               | 72.96%              |
| SLC9A9      | 145.38%               | 72.95%              |
| PLP2        | 147.23%               | 72.91%              |
| MIER3       | 213.03%               | 72.58%              |
| NPTX2       | 146.01%               | 72.56%              |
| PXDN        | 151.01%               | 72.54%              |
| CYTH1       | 12.20%                | 72.40%              |
| TLR3        | 76.29%                | 72.08%              |
| THOC4       | 78.89%                | 71.95%              |
| ARF6        | 268.59%               | 71.88%              |
| RBM3        | 451.00%               | 71.87%              |
| TRAF6       | 204.92%               | 71.18%              |

|         |          |        |
|---------|----------|--------|
| USP38   | 225.25%  | 70.93% |
| STAT3   | 483.13%  | 70.83% |
| PFKFB3  | 298.08%  | 70.46% |
| MAGEH1  | 161.65%  | 70.44% |
| ADAMTS5 | 397.98%  | 70.18% |
| SOX9    | 468.97%  | 70.13% |
| NR4A1   | 603.37%  | 70.13% |
| LEMD3   | 88.78%   | 70.12% |
| NUP160  | 255.74%  | 69.98% |
| CPT1C   | 34.95%   | 69.94% |
| OLFML2B | 56.64%   | 69.93% |
| SERINC1 | 560.00%  | 69.89% |
| GATAD2A | 176.25%  | 69.77% |
| TWIST1  | 101.18%  | 69.71% |
| TXNRD1  | 498.14%  | 69.37% |
| EDARADD | 265.03%  | 69.16% |
| CRKRS   | 133.63%  | 69.15% |
| HBP1    | 193.98%  | 69.14% |
| MBLAC1  | 359.97%  | 69.00% |
| UBE2J2  | 33.89%   | 68.67% |
| TJP1    | 147.46%  | 68.51% |
| PCDHB5  | 85.99%   | 68.49% |
| AQP11   | 879.49%  | 68.38% |
| SDF2    | 127.93%  | 68.35% |
| CACHD1  | 157.89%  | 68.31% |
| GLCE    | 445.83%  | 68.12% |
| NUP160  | 201.39%  | 68.08% |
| S1PR1   | 598.38%  | 67.94% |
| ATHL1   | 173.76%  | 67.81% |
| TPK1    | 24.39%   | 67.74% |
| IMPA2   | 85.91%   | 67.72% |
| DOCK1   | 309.76%  | 67.72% |
| WAC     | 65.30%   | 67.56% |
| CXCR4   | 275.45%  | 67.42% |
| ADIPOR2 | 183.85%  | 67.42% |
| COPS6   | 38.10%   | 67.33% |
| PPP2R2D | 30.02%   | 67.23% |
| SORBS1  | 457.37%  | 67.14% |
| AMFR    | 243.25%  | 67.13% |
| PSMB2   | 155.99%  | 66.87% |
| SYPL1   | 412.50%  | 66.87% |
| UBE2N   | 52.50%   | 66.86% |
| PAX2    | 293.59%  | 66.67% |
| CEBPG   | 66.29%   | 66.67% |
| GPR65   | 1126.04% | 66.62% |
| EIF3S10 | 104.65%  | 66.47% |
| SEC22B  | 331.00%  | 66.37% |

|             |          |        |
|-------------|----------|--------|
| D4ST1       | 102.51%  | 66.35% |
| SYNPO       | 20.17%   | 66.33% |
| ARF3        | 85.71%   | 66.30% |
| LMNB1       | 549.14%  | 66.29% |
| ADAM10      | 116.41%  | 66.17% |
| HNRNPAB     | 57.60%   | 65.96% |
| YBX2        | 62.84%   | 65.94% |
| ELOVL5      | 477.24%  | 65.93% |
| IDO1        | 36.59%   | 65.84% |
| SBNO2       | 31.31%   | 65.70% |
| C1orf106    | 213.44%  | 65.69% |
| PRPSAP1     | 53.42%   | 65.67% |
| PDCD4       | 144.41%  | 65.58% |
| ARSG        | 38.72%   | 65.46% |
| MYO1B       | 283.26%  | 65.39% |
| TULP4       | 77.90%   | 65.38% |
| LMLN        | 967.24%  | 65.11% |
| G3BP2       | 330.60%  | 64.95% |
| LAMA2       | 217.39%  | 64.66% |
| SAMD9       | 38.56%   | 64.32% |
| NEO1        | 98.96%   | 64.29% |
| WDR40A      | 49.36%   | 64.15% |
| TRA2A       | 247.37%  | 64.08% |
| MIDN        | 49.82%   | 64.06% |
| ATF3        | 87.84%   | 64.06% |
| IREB2       | 366.37%  | 63.93% |
| TMEM45A     | 313.26%  | 63.91% |
| IL2         | 70.76%   | 63.90% |
| FOXQ1       | 122.27%  | 63.00% |
| TM9SF3      | 76.87%   | 62.99% |
| PSD3        | 257.27%  | 62.78% |
| RABGAP1     | 23.28%   | 62.77% |
| MFAP3       | 1343.53% | 62.75% |
| TAF1L       | 18.80%   | 62.73% |
| POLS        | 417.04%  | 62.51% |
| AGXT2L2     | 65.83%   | 62.48% |
| PDHB        | 98.93%   | 62.44% |
| NPTN        | 199.33%  | 62.44% |
| PPME1       | 107.42%  | 62.41% |
| C22orf13    | 18.45%   | 62.36% |
| FBN2        | 240.80%  | 62.34% |
| MAP4K3      | 615.84%  | 62.08% |
| GLRXP,GLRX  | 160.55%  | 62.01% |
| LANCL1      | 195.10%  | 62.01% |
| GPNMB       | 333.52%  | 61.89% |
| FGL2        | 6499.13% | 61.87% |
| CALR3,MED26 | 55.71%   | 61.61% |

|                            |          |        |
|----------------------------|----------|--------|
| GLCCI1                     | 75.63%   | 61.53% |
| ADAMTS4                    | 103.68%  | 61.50% |
| HIRA                       | 12.69%   | 61.49% |
| PHTF2                      | 86.72%   | 61.46% |
| ATP1B1                     | 409.91%  | 61.42% |
| RASGRP3                    | 580.24%  | 61.42% |
| CCNJ                       | 46.57%   | 61.41% |
| SLC35F5                    | 1298.00% | 61.37% |
| TMEM123                    | 260.02%  | 61.36% |
| ZRANB1                     | 155.61%  | 61.33% |
| CEPT1                      | 126.82%  | 61.27% |
| M6PR                       | 100.52%  | 61.19% |
| SCD                        | 320.95%  | 61.18% |
| MSX2                       | 50.79%   | 61.15% |
| DHRS7                      | 457.25%  | 61.10% |
| RP11-2J18.1,ARID1B,C19orf6 | 57.09%   | 60.99% |
| NDUFA11                    | 131.59%  | 60.98% |
| DPM3                       | 10.38%   | 60.97% |
| DHRS11                     | 165.45%  | 60.95% |
| GAS8                       | 25.59%   | 60.94% |
| HLA-DRB3,HLA-DRB1,DASS-2   | 29.60%   | 60.92% |
| YWHAG                      | 218.48%  | 60.91% |
| AC010896.3                 | 60.98%   | 60.86% |
| FZD7                       | 410.99%  | 60.83% |
| IQGAP2                     | 131.36%  | 60.76% |
| USP15                      | 651.21%  | 60.66% |
| MMP2                       | 184.16%  | 60.61% |
| AC025181.8-1,MTMR12        | 67.96%   | 60.60% |
| CLU                        | 39.90%   | 60.57% |
| ADCY6                      | 37.95%   | 60.56% |
| UBB                        | 65.68%   | 60.48% |
| RP11-478H16.1              | 160.45%  | 60.46% |
| MEX3D                      | 24.45%   | 60.45% |
| PAQR5                      | 497.59%  | 60.41% |
| TPR                        | 137.97%  | 60.36% |
| PFKM                       | 42.04%   | 60.35% |
| AC004836.2                 | 34.75%   | 60.34% |
| TUBB3                      | 11.52%   | 60.33% |
| PARP1                      | 20.28%   | 60.32% |
| UPB1                       | 167.67%  | 60.27% |
| NUP107                     | 55.88%   | 60.17% |
| C1orf49                    | 182.07%  | 60.12% |
| C4orf32                    | 704.78%  | 60.11% |
| NEK6                       | 113.93%  | 60.09% |
| DENND1A                    | 65.68%   | 60.04% |
| HLA-DRB1,HLA-DRB1,HLA-DR   | 13.09%   | 59.98% |
| OTUD4                      | 148.53%  | 59.84% |

|                            |         |        |
|----------------------------|---------|--------|
| CDKN1B                     | 692.55% | 59.72% |
| ADAM17                     | 203.40% | 59.68% |
| TEX2                       | 52.47%  | 59.67% |
| MNAT1                      | 410.57% | 59.62% |
| TMEM205                    | 14.42%  | 59.56% |
| GOLPH3                     | 313.80% | 59.53% |
| ZCCHC14                    | 69.37%  | 59.51% |
| PRDX2                      | 312.67% | 59.43% |
| C3AR1                      | 166.17% | 59.36% |
| TMEM99                     | 126.74% | 59.35% |
| CFH                        | 307.64% | 59.34% |
| SFRP2                      | 99.09%  | 59.34% |
| RP11-332P22.1              | 173.00% | 59.33% |
| SCNN1G                     | 312.29% | 59.28% |
| KLHL20                     | 78.09%  | 59.23% |
| AP002959.2,BMPR1A          | 327.62% | 59.19% |
| MAP2K3                     | 130.43% | 59.14% |
| ITM2C                      | 34.82%  | 59.12% |
| SLC25A2                    | 10.50%  | 59.07% |
| RBPSUH                     | 41.96%  | 59.03% |
| FAP                        | 213.84% | 59.02% |
| GORAB                      | 320.35% | 58.92% |
| CEBPB                      | 49.09%  | 58.82% |
| ERLIN1                     | 14.93%  | 58.74% |
| TARDBP                     | 62.50%  | 58.67% |
| C2orf27,CR382287.7-1,RP11- | 35.98%  | 58.61% |
| PAFAH1B1                   | 44.93%  | 58.40% |
| EIF2B5,FAM131A             | 165.68% | 58.29% |
| MRPL36,AC016700.4          | 16.96%  | 58.29% |
| GRPEL1                     | 22.63%  | 58.16% |
| KIF2A                      | 195.88% | 58.13% |
| HDAC4                      | 46.12%  | 58.13% |
| RALBP1                     | 48.99%  | 58.13% |
| PPP2R5C                    | 138.12% | 58.09% |
| CLTA                       | 23.35%  | 57.93% |
| RPN1                       | 46.99%  | 57.90% |
| AC004066.1-2,EEF1A1,EEF1A  | 124.31% | 57.89% |
| SOX4                       | 288.34% | 57.88% |
| NDUFA4                     | 70.48%  | 57.86% |
| LACTB                      | 12.57%  | 57.81% |
| BAG3                       | 88.38%  | 57.79% |
| ATL3,RP5-1053E7.1,SPCS2    | 115.11% | 57.78% |
| TNFRSF14                   | 67.26%  | 57.77% |
| OAZ2                       | 24.50%  | 57.75% |
| HLA-E,HLA-E,HLA-E,HLA-E    | 54.51%  | 57.71% |
| CREB1                      | 154.87% | 57.65% |
| ZNF644                     | 56.17%  | 57.65% |

|                           |          |        |
|---------------------------|----------|--------|
| SLC26A2                   | 923.86%  | 57.63% |
| DAD1                      | 250.60%  | 57.62% |
| TOB2                      | 492.94%  | 57.58% |
| RAB31                     | 47.87%   | 57.52% |
| DHRS11                    | 70.43%   | 57.50% |
| BMS1,AC129778.3,RP11-15J1 | 32.45%   | 57.49% |
| AOX1                      | 82.24%   | 57.46% |
| ARFGEF1                   | 32.43%   | 57.35% |
| PFKFB3                    | 174.52%  | 57.31% |
| LPIN1                     | 305.76%  | 57.29% |
| TCERG1L                   | 100.80%  | 57.23% |
| PPIB                      | 79.79%   | 57.16% |
| PEX5                      | 42.38%   | 57.12% |
| LBH                       | 239.95%  | 57.11% |
| CTSC                      | 568.07%  | 57.08% |
| ARGLU1                    | 122.90%  | 57.02% |
| SAR1A                     | 375.81%  | 57.00% |
| PLA2G2C                   | 31.22%   | 56.98% |
| GCA                       | 87.55%   | 56.97% |
| RXRG                      | 40.39%   | 56.95% |
| FMO5                      | 157.62%  | 56.94% |
| ZFYVE26                   | 114.52%  | 56.91% |
| USP8P,USP8P,USP8P,USP8P,I | 1081.57% | 56.86% |
| PJA1                      | 138.28%  | 56.83% |
| PHTF1                     | 685.58%  | 56.81% |
| MOBK1A                    | 31.92%   | 56.73% |
| RPE                       | 42.57%   | 56.71% |
| PTX3                      | 140.36%  | 56.67% |
| PDGFC                     | 357.60%  | 56.55% |
| TMEM14C                   | 176.01%  | 56.49% |
| TSSK3                     | 12.34%   | 56.46% |
| EMP1                      | 344.44%  | 56.46% |
| GIGYF2,C2orf82            | 50.65%   | 56.44% |
| PIK3R1                    | 117.45%  | 56.43% |
| BBS4                      | 167.56%  | 56.40% |
| SLC46A3                   | 585.71%  | 56.40% |
| PPFIBP1                   | 24.72%   | 56.39% |
| GRID1                     | 287.58%  | 56.36% |
| KIAA1045                  | 89.18%   | 56.33% |
| AC093162.3,SNRPE          | 179.29%  | 56.32% |
| CTGLF10P,AGAP7,AGAP6,BM   | 140.47%  | 56.31% |
| ENOX2                     | 393.90%  | 56.28% |
| KNG1                      | 93.66%   | 56.24% |
| SRPK1                     | 107.49%  | 56.20% |
| AREGB,AREG                | 1881.42% | 56.19% |
| BOLA3                     | 182.64%  | 56.18% |
| XIAP                      | 253.60%  | 56.09% |

|                          |          |        |
|--------------------------|----------|--------|
| SEMA4D                   | 430.04%  | 56.09% |
| POU3F3                   | 73.70%   | 56.02% |
| SCYL2                    | 967.86%  | 56.02% |
| C1orf212                 | 76.49%   | 56.00% |
| BACH1                    | 1164.23% | 55.99% |
| ZDHHC17                  | 239.91%  | 55.93% |
| DKK1                     | 178.16%  | 55.92% |
| CA13                     | 45.08%   | 55.92% |
| LRBA                     | 209.02%  | 55.91% |
| AC009967.6               | 185.06%  | 55.85% |
| HSD17B2                  | 51.03%   | 55.84% |
| NFIX                     | 18.58%   | 55.83% |
| PAPPA                    | 359.84%  | 55.80% |
| CDK2                     | 128.34%  | 55.74% |
| RPS6KB1,AC013274.3       | 121.37%  | 55.69% |
| SLC22A4                  | 206.49%  | 55.69% |
| DPY30                    | 139.97%  | 55.68% |
| NIPA1                    | 112.55%  | 55.66% |
| AC019084.9,FAM62B        | 715.65%  | 55.65% |
| KIAA0090                 | 35.51%   | 55.63% |
| NRARP                    | 2171.84% | 55.60% |
| HSP90B3P,HSP90B1         | 336.44%  | 55.53% |
| LSM2,LSM2,LSM2,LSM2,LSM  | 89.32%   | 55.53% |
| HMGCR                    | 784.86%  | 55.52% |
| KCNJ8                    | 329.08%  | 55.49% |
| DERA                     | 202.12%  | 55.48% |
| HTATIP2                  | 125.16%  | 55.44% |
| RNF38                    | 97.10%   | 55.40% |
| CCT2                     | 130.90%  | 55.39% |
| INTS3                    | 55.85%   | 55.35% |
| CD53                     | 248.92%  | 55.32% |
| DDN                      | 51.01%   | 55.25% |
| GNL1,GNL1,GNL1,GNL1,GNL1 | 98.79%   | 55.14% |
| CYLD                     | 200.29%  | 55.13% |
| RP11-557H15.2            | 772.47%  | 55.03% |
| ALOX5AP                  | 156.71%  | 55.02% |
| FAM98A                   | 93.78%   | 55.02% |
| RP6-213H19.1             | 194.82%  | 54.98% |
| RP11-178A10.1            | 116.53%  | 54.93% |
| BTAF1                    | 1017.36% | 54.93% |
| ZNF317                   | 402.13%  | 54.87% |
| PODXL                    | 26.33%   | 54.84% |
| AC073479.1               | 186.02%  | 54.81% |
| NKRF                     | 203.89%  | 54.79% |
| AC025449.6-1             | 48.79%   | 54.77% |
| CYCS                     | 242.16%  | 54.76% |
| EXT1                     | 57.89%   | 54.73% |

|                          |          |        |
|--------------------------|----------|--------|
| NCOA3                    | 90.11%   | 54.71% |
| NSL1                     | 142.65%  | 54.63% |
| ANKLE2                   | 155.21%  | 54.60% |
| APH1B                    | 592.96%  | 54.57% |
| SLC8A1                   | 89.40%   | 54.56% |
| NUPL1                    | 843.58%  | 54.52% |
| PHLPPL                   | 180.84%  | 54.49% |
| TBK1                     | 178.86%  | 54.48% |
| AC010328.4,ARPC1A        | 120.33%  | 54.46% |
| MCTP2                    | 126.66%  | 54.45% |
| SLC35B4                  | 132.27%  | 54.40% |
| SUCLG2                   | 258.60%  | 54.37% |
| WDR47                    | 663.56%  | 54.27% |
| NLE1                     | 77.46%   | 54.21% |
| RP3-510D11.1             | 63.42%   | 54.21% |
| RNF4,RP11-423F24.3       | 37.51%   | 54.19% |
| ADCY9                    | 235.74%  | 54.04% |
| AAMP                     | 23.86%   | 54.04% |
| CHST15                   | 19.88%   | 54.03% |
| PTPRC                    | 154.86%  | 54.02% |
| L3MBTL3                  | 403.36%  | 54.00% |
| SMC6                     | 104.00%  | 53.95% |
| PDIA3P,PDIA3             | 14.75%   | 53.88% |
| TFRC                     | 186.61%  | 53.84% |
| C5orf32                  | 104.07%  | 53.83% |
| AHSA2                    | 21.48%   | 53.83% |
| CYP27C1                  | 135.47%  | 53.80% |
| CUTA,CUTA                | 20.40%   | 53.79% |
| MED13L                   | 48.83%   | 53.77% |
| SCPEP1                   | 14.81%   | 53.77% |
| SFRS2                    | 149.33%  | 53.73% |
| ANKIB1                   | 110.96%  | 53.67% |
| ROCK2                    | 165.22%  | 53.59% |
| ACTBL2,PLEKHB2,POTEE,A26 | 112.99%  | 53.54% |
| FAT3                     | 68.38%   | 53.44% |
| KNDC1                    | 93.84%   | 53.43% |
| KIAA0319                 | 46.11%   | 53.41% |
| ADCY7                    | 376.58%  | 53.40% |
| PLA2G4E                  | 69.02%   | 53.40% |
| TMCO1                    | 25.57%   | 53.39% |
| FILIP1                   | 159.79%  | 53.37% |
| PIWIL4                   | 39.39%   | 53.31% |
| COLEC12                  | 333.33%  | 53.30% |
| PFKP                     | 21.86%   | 53.30% |
| CTNNA1                   | 183.88%  | 53.28% |
| PARL                     | 193.62%  | 53.26% |
| FUSIP1,BX511012.5-2      | 1217.70% | 53.26% |



|                   |          |        |
|-------------------|----------|--------|
| ZRANB2            | 110.15%  | 53.24% |
| ATP5B             | 184.45%  | 53.22% |
| C21orf51          | 193.03%  | 53.16% |
| XPO1              | 97.75%   | 53.12% |
| TCF4              | 67.42%   | 53.09% |
| BRP44             | 105.44%  | 53.08% |
| RNF8              | 25.52%   | 53.07% |
| LNP1              | 44.84%   | 53.04% |
| BBS9              | 36.54%   | 53.01% |
| RNF26             | 13.07%   | 52.97% |
| ALG12             | 59.24%   | 52.94% |
| INSIG2            | 130.79%  | 52.91% |
| HNMT              | 105.96%  | 52.89% |
| KLF4              | 150.50%  | 52.83% |
| IL22RA2           | 233.67%  | 52.82% |
| ATP1B1            | 160.07%  | 52.81% |
| ANGPT1            | 115.36%  | 52.79% |
| NUP205            | 381.45%  | 52.78% |
| ABCC13            | 49.59%   | 52.78% |
| RAB11A            | 141.36%  | 52.76% |
| GNB4              | 87.17%   | 52.76% |
| ZNF33A            | 68.67%   | 52.69% |
| ME1               | 85.83%   | 52.60% |
| GOT1              | 87.86%   | 52.52% |
| RBM5              | 100.50%  | 52.52% |
| MAMLD1            | 322.30%  | 52.50% |
| ATP6V1H           | 122.08%  | 52.46% |
| HS3ST1            | 52.04%   | 52.45% |
| RP11-14C22.4,SVIL | 251.56%  | 52.44% |
| BIRC3             | 78.04%   | 52.43% |
| KLHL18            | 234.78%  | 52.35% |
| TMEM218           | 91.32%   | 52.34% |
| PPAP2B            | 260.86%  | 52.33% |
| C1orf25           | 29.02%   | 52.29% |
| SREBF2            | 17.19%   | 52.28% |
| PIM2              | 44.00%   | 52.26% |
| B4GALT5           | 42.64%   | 52.25% |
| STOM              | 63.27%   | 52.24% |
| SMARCA2           | 237.49%  | 52.23% |
| PCDH18            | 77.27%   | 52.17% |
| SYDE1             | 37.98%   | 52.14% |
| SLC25A3           | 675.84%  | 52.12% |
| LRRC8B            | 1228.05% | 52.10% |
| SPG3A             | 218.98%  | 52.05% |
| RMND5A            | 88.26%   | 52.02% |
| FBN1              | 140.85%  | 52.01% |
| FBXO15            | 80.49%   | 51.99% |

|                            |          |        |
|----------------------------|----------|--------|
| ADSS                       | 17.65%   | 51.96% |
| CCDC104                    | 46.24%   | 51.91% |
| LYPD3                      | 246.87%  | 51.89% |
| HNRNPR,RP11-177H22.2       | 321.82%  | 51.87% |
| ACBD3                      | 198.56%  | 51.86% |
| SPINT2                     | 105.74%  | 51.85% |
| MLX                        | 19.73%   | 51.83% |
| KRTAP19-6                  | 55.04%   | 51.82% |
| IMMP2L                     | 145.09%  | 51.82% |
| C3orf10                    | 30.02%   | 51.79% |
| TWIST2                     | 19.95%   | 51.78% |
| TLR7                       | 144.91%  | 51.77% |
| HIC1                       | 34.51%   | 51.77% |
| TCP11L1                    | 218.57%  | 51.75% |
| AC006158.8                 | 50.22%   | 51.74% |
| HAS1                       | 99.18%   | 51.70% |
| SPTBN1                     | 34.06%   | 51.68% |
| MED13                      | 182.77%  | 51.67% |
| ZNF598                     | 69.58%   | 51.64% |
| FAM89B                     | 32.49%   | 51.64% |
| ATPGD1                     | 89.95%   | 51.63% |
| IGDCC4                     | 21.77%   | 51.61% |
| SP140L                     | 46.87%   | 51.53% |
| SCRN1                      | 116.34%  | 51.49% |
| C15orf24                   | 94.32%   | 51.44% |
| ANK3                       | 29.46%   | 51.39% |
| CCNY                       | 186.16%  | 51.37% |
| GNB1                       | 235.23%  | 51.37% |
| GDAP1                      | 47.56%   | 51.35% |
| MURC                       | 81.85%   | 51.35% |
| RP11-490G2.1               | 1760.53% | 51.20% |
| DPT                        | 15.74%   | 51.19% |
| KIF1C                      | 84.56%   | 51.19% |
| EGFR                       | 540.31%  | 51.15% |
| ACAT1                      | 102.86%  | 51.11% |
| IQCG                       | 50.38%   | 51.10% |
| SLC10A3                    | 91.89%   | 51.08% |
| C3orf10                    | 26.65%   | 51.06% |
| RP11-289I10.2,RP11-775L16. | 42.66%   | 51.02% |
| RP11-552E20.3              | 113.87%  | 51.00% |
| RAB11FIP2                  | 26.03%   | 50.98% |
| LYN                        | 292.47%  | 50.96% |
| FGFR1                      | 19.38%   | 50.92% |
| NUDT4P1                    | 16.69%   | 50.92% |
| TDG                        | 39.80%   | 50.92% |
| GLB1,TMPPE                 | 327.70%  | 50.90% |

|                    |          |        |
|--------------------|----------|--------|
| GIGYF1             | 69.12%   | 50.89% |
| C14orf4            | 81.35%   | 50.89% |
| PAQR3              | 285.53%  | 50.88% |
| ELL2,RP11-404O13.2 | 1615.15% | 50.86% |
| ZAK                | 444.47%  | 50.84% |
| SFMBT2             | 81.49%   | 50.78% |
| RP11-445H22.4      | 17.21%   | 50.76% |
| CYP46A1            | 68.91%   | 50.75% |
| SEC14L1            | 36.32%   | 50.71% |
| NOG                | 78.26%   | 50.70% |
| EFNB2              | 1347.68% | 50.65% |
| APLP2              | 138.92%  | 50.65% |
| SLC25A20           | 151.97%  | 50.64% |
| ODC1               | 102.16%  | 50.62% |
| AGXT2L2            | 15.41%   | 50.60% |
| GPRC5D             | 111.43%  | 50.58% |
| VPS4A              | 15.48%   | 50.54% |
| NUBP1              | 70.88%   | 50.54% |
| IFI6               | 55.53%   | 50.53% |
| PTGER3             | 224.02%  | 50.51% |
| SECISBP2           | 111.81%  | 50.51% |
| LMO2               | 32.62%   | 50.50% |
| RNF169             | 28.32%   | 50.50% |
| RORA               | 43.05%   | 50.49% |
| NEUROG2            | 64.12%   | 50.48% |
| HEATR5B            | 727.43%  | 50.48% |
| FAM45B,FAM45A      | 83.31%   | 50.46% |
| FUCA1              | 202.91%  | 50.39% |
| ZMPSTE24           | 579.55%  | 50.39% |
| SH3GLB2            | 39.79%   | 50.37% |
| CHST11             | 15.11%   | 50.36% |
| MSN                | 85.86%   | 50.36% |
| NOP16              | 32.27%   | 50.35% |
| OXR1               | 39.96%   | 50.34% |
| VPS35              | 21.30%   | 50.33% |
| TRMT6              | 43.48%   | 50.30% |
| CORO2B             | 97.39%   | 50.28% |
| SCP2               | 334.52%  | 50.28% |
| DCTN6              | 341.00%  | 50.26% |
| YSK4               | 74.96%   | 50.18% |
| TM2D3              | 32.83%   | 50.17% |
| SLC25A25           | 114.98%  | 50.10% |
| CDC42EP3           | 521.95%  | 50.07% |
| DLG5               | 35.96%   | 50.06% |
| EIF1AD             | 30.98%   | 50.06% |
| UTP23              | 18.42%   | 50.02% |
| TMEM158            | 14.19%   | 50.00% |

|                           |         |        |
|---------------------------|---------|--------|
| SMC6                      | 63.97%  | 49.98% |
| C5orf33                   | 142.10% | 49.98% |
| SEC24C                    | 25.23%  | 49.98% |
| TIGD7                     | 116.90% | 49.98% |
| NGFRAP1                   | 35.76%  | 49.97% |
| ITGAE                     | 57.67%  | 49.93% |
| TAX1BP3                   | 25.02%  | 49.83% |
| PEA15                     | 74.68%  | 49.82% |
| PDX1                      | 112.99% | 49.80% |
| C19orf52                  | 13.33%  | 49.76% |
| VPS4B                     | 25.28%  | 49.76% |
| AP2A2                     | 86.58%  | 49.75% |
| IQCA                      | 19.76%  | 49.71% |
| DKK3                      | 28.91%  | 49.68% |
| AC003003.4                | 55.27%  | 49.68% |
| PCSK7                     | 17.35%  | 49.63% |
| TMEM30A,COX7A2            | 24.85%  | 49.60% |
| CNIH3                     | 51.32%  | 49.55% |
| STAT3                     | 242.07% | 49.54% |
| HSD11B2                   | 26.67%  | 49.52% |
| NTF3                      | 15.58%  | 49.44% |
| ZNF571                    | 541.72% | 49.43% |
| CHMP5                     | 22.87%  | 49.41% |
| HNRNPF                    | 25.89%  | 49.40% |
| CXCL1                     | 12.59%  | 49.38% |
| AC146944.1-4,AC146944.1-5 | 25.81%  | 49.33% |
| C9orf5                    | 55.25%  | 49.29% |
| GNA13                     | 502.90% | 49.29% |
| RP11-390F4.10             | 59.03%  | 49.28% |
| MAGED1                    | 62.66%  | 49.25% |
| GATA3                     | 47.34%  | 49.23% |
| ANAPC11                   | 27.19%  | 49.19% |
| RP11-35L17.2              | 84.25%  | 49.15% |
| ACTR3                     | 245.28% | 49.10% |
| AC008013.8-1              | 39.83%  | 49.05% |
| RP11-134K13.2,SMS,AC1149  | 84.13%  | 49.05% |
| AC145098.2-2              | 13.21%  | 49.04% |
| ILDR1                     | 89.25%  | 49.02% |
| KPNA2                     | 93.21%  | 48.98% |
| AJAP1                     | 39.30%  | 48.96% |
| CHST1                     | 33.91%  | 48.96% |
| TMEM85                    | 25.31%  | 48.95% |
| CLIC6                     | 108.43% | 48.91% |
| TMEM39B                   | 131.93% | 48.85% |
| VPS24                     | 41.46%  | 48.85% |
| AC135457.2-3              | 54.47%  | 48.85% |
| MEGF8                     | 28.91%  | 48.85% |

|                            |          |        |
|----------------------------|----------|--------|
| IL13                       | 251.73%  | 48.79% |
| ANKRD58                    | 55.90%   | 48.79% |
| MYH9                       | 48.06%   | 48.78% |
| ELF4                       | 34.61%   | 48.77% |
| DCTN3                      | 85.88%   | 48.76% |
| C12orf75                   | 296.35%  | 48.75% |
| PAPD4                      | 19.85%   | 48.75% |
| AC019016.7,CSNK1A1,AC021   | 282.69%  | 48.73% |
| TESK2                      | 117.58%  | 48.73% |
| MGAT4A                     | 357.99%  | 48.71% |
| ICMT                       | 26.64%   | 48.71% |
| SSTR5                      | 63.31%   | 48.70% |
| AC127391.3,AL590623.16-1,( | 54.74%   | 48.69% |
| EIF4EBP2                   | 99.24%   | 48.66% |
| CCNI                       | 161.64%  | 48.66% |
| ADRA1B                     | 117.59%  | 48.65% |
| ENPP2                      | 912.63%  | 48.65% |
| BECN1                      | 105.12%  | 48.62% |
| SYT11                      | 23.76%   | 48.53% |
| AC125807.9,AL355773.4-1    | 25.56%   | 48.50% |
| ALAS1                      | 16.56%   | 48.49% |
| RP11-156G14.1,ZFAND6       | 67.39%   | 48.47% |
| ASB8                       | 164.70%  | 48.47% |
| ZFP91                      | 94.52%   | 48.42% |
| AMAC1,POLR2A,AMAC1L3       | 34.30%   | 48.41% |
| HTR6                       | 52.62%   | 48.37% |
| C11orf83                   | 102.81%  | 48.34% |
| GALNT3                     | 110.81%  | 48.33% |
| FNIP2                      | 356.94%  | 48.31% |
| CD2AP                      | 440.44%  | 48.30% |
| TAC1                       | 5354.29% | 48.30% |
| PDGFRL                     | 69.84%   | 48.29% |
| NHEDC2                     | 155.88%  | 48.28% |
| RAB36                      | 62.31%   | 48.21% |
| TBC1D9B                    | 10.17%   | 48.19% |
| SLC38A1                    | 108.53%  | 48.18% |
| C7orf65                    | 62.10%   | 48.18% |
| HNRNPUL1                   | 51.62%   | 48.17% |
| RNF43                      | 37.47%   | 48.14% |
| EPB41L3                    | 34.90%   | 48.14% |
| UBXN6                      | 69.04%   | 48.11% |
| RGS10                      | 24.06%   | 48.06% |
| PEF1                       | 27.20%   | 48.05% |
| ATP6V1F                    | 44.45%   | 48.03% |
| LCE1C,LCE1A,LCE1B,LCE1F,LC | 223.26%  | 48.02% |
| C14orf142                  | 457.74%  | 48.01% |
| NUBP2                      | 20.93%   | 47.97% |

|                            |          |        |
|----------------------------|----------|--------|
| PPAT                       | 390.08%  | 47.89% |
| AL139020.5                 | 54.88%   | 47.87% |
| SMEK1                      | 94.43%   | 47.86% |
| CHST3                      | 67.54%   | 47.85% |
| CSTF1                      | 13.47%   | 47.80% |
| PRDM7                      | 13.44%   | 47.78% |
| RNF5,RNF5,RNF5,RNF5,RNF5   | 117.48%  | 47.72% |
| LRMP                       | 405.75%  | 47.72% |
| OSTF1                      | 117.17%  | 47.71% |
| ACOX1                      | 225.82%  | 47.71% |
| NTS                        | 382.43%  | 47.70% |
| C1orf89                    | 106.10%  | 47.70% |
| SLC16A6,AC037487.12        | 77.84%   | 47.63% |
| GORASP2                    | 92.79%   | 47.60% |
| COL5A1                     | 41.61%   | 47.58% |
| GPATCH2                    | 624.78%  | 47.56% |
| EIF3S1                     | 169.31%  | 47.54% |
| CDK4                       | 14.37%   | 47.50% |
| KLRG1                      | 253.40%  | 47.50% |
| USE1                       | 24.11%   | 47.48% |
| NANOS1                     | 183.42%  | 47.45% |
| AC084018.1                 | 72.53%   | 47.42% |
| MARS2,AC011997.1           | 192.73%  | 47.42% |
| HACE1                      | 140.28%  | 47.40% |
| MFSD8                      | 211.70%  | 47.38% |
| CDADC1                     | 36.55%   | 47.36% |
| AC007365.1                 | 48.69%   | 47.30% |
| MPV17                      | 41.50%   | 47.29% |
| BBS2                       | 16.50%   | 47.29% |
| AC104164.2-2,TMED2         | 259.70%  | 47.27% |
| KCNC3                      | 30.10%   | 47.25% |
| TRPS1                      | 111.63%  | 47.25% |
| MYH9                       | 90.60%   | 47.20% |
| KIAA1217                   | 32.78%   | 47.19% |
| LONP2                      | 88.58%   | 47.17% |
| ELF2                       | 37.09%   | 47.15% |
| RTN4                       | 68.82%   | 47.14% |
| LGR6                       | 75.62%   | 47.12% |
| SLC4A8                     | 130.97%  | 47.11% |
| STX7                       | 19.57%   | 47.07% |
| FAM91A1                    | 975.00%  | 47.07% |
| KHDRBS1                    | 52.17%   | 47.04% |
| LNX1                       | 90.55%   | 47.04% |
| BTBD3                      | 97.77%   | 47.02% |
| LPGAT1                     | 298.90%  | 47.00% |
| ARID5B                     | 1443.94% | 46.97% |
| C11orf73,RP11-654E17.2,PTC | 101.95%  | 46.96% |

|                            |          |        |
|----------------------------|----------|--------|
| LSS,AP001468.1             | 16.76%   | 46.96% |
| KDM5A                      | 164.85%  | 46.95% |
| TP53INP1                   | 10.84%   | 46.94% |
| MAP3K5                     | 36.99%   | 46.90% |
| USP16                      | 98.57%   | 46.90% |
| SCN8A                      | 83.92%   | 46.89% |
| RERE                       | 125.76%  | 46.89% |
| CD99                       | 40.67%   | 46.89% |
| RP11-568G11.3,AC079789.2   | 279.58%  | 46.87% |
| RBM26                      | 116.44%  | 46.82% |
| CDC42EP1                   | 33.74%   | 46.80% |
| RP1-232L22__B.1,GK         | 1077.61% | 46.77% |
| CA7                        | 42.42%   | 46.76% |
| ISL1                       | 32.30%   | 46.75% |
| TSPAN17                    | 18.58%   | 46.75% |
| DUSP16                     | 102.37%  | 46.73% |
| YWHAB                      | 35.57%   | 46.73% |
| AC078819.24-1,AC012085.4,I | 111.37%  | 46.63% |
| CUGBP1                     | 42.40%   | 46.61% |
| CFLP2,CFL1                 | 18.00%   | 46.61% |
| snoU13,ZNF275              | 122.78%  | 46.59% |
| INHBA,AC005027.3           | 692.74%  | 46.58% |
| GNLY                       | 46.30%   | 46.57% |
| KREMEN2                    | 37.37%   | 46.56% |
| AC083899.3,ANAPC1          | 17.20%   | 46.55% |
| HHAT                       | 61.92%   | 46.54% |
| FAM22A,FAM22E,FAM22D,F     | 29.86%   | 46.53% |
| RBM17                      | 10.12%   | 46.53% |
| AOF2                       | 69.15%   | 46.53% |
| DCTD                       | 26.34%   | 46.52% |
| C20orf23                   | 168.23%  | 46.50% |
| C10orf65                   | 21.43%   | 46.49% |
| ERMP1                      | 554.56%  | 46.46% |
| TET3                       | 182.16%  | 46.42% |
| MEIS1                      | 40.81%   | 46.41% |
| C14orf132                  | 49.53%   | 46.41% |
| CTGF                       | 137.05%  | 46.41% |
| GCC1                       | 23.74%   | 46.40% |
| PRSS36                     | 334.82%  | 46.36% |
| ZNF449                     | 63.79%   | 46.36% |
| INSL6                      | 61.14%   | 46.36% |
| ANO10                      | 81.88%   | 46.34% |
| TPO                        | 30.58%   | 46.28% |
| RP11-343J24.1              | 108.98%  | 46.28% |
| PREPL                      | 168.17%  | 46.26% |
| AC007750.5                 | 93.52%   | 46.24% |
| C20orf24                   | 119.07%  | 46.21% |

|             |          |        |
|-------------|----------|--------|
| PIN4        | 33.56%   | 46.21% |
| MARCH11     | 33.01%   | 46.20% |
| MARS        | 144.37%  | 46.17% |
| ACAT1       | 592.81%  | 46.15% |
| CCDC127     | 35.98%   | 46.13% |
| MBOAT1      | 233.17%  | 46.11% |
| BTG3        | 241.23%  | 46.10% |
| USP9X       | 74.74%   | 46.09% |
| CSPG2       | 246.80%  | 46.08% |
| KLHL15      | 180.58%  | 46.02% |
| GJA1        | 220.23%  | 46.02% |
| SLC6A8      | 16.17%   | 45.98% |
| CWC15       | 20.10%   | 45.97% |
| PTPN11      | 286.51%  | 45.97% |
| TM9SF1      | 116.55%  | 45.92% |
| FAM105A     | 303.73%  | 45.91% |
| FAM57A      | 160.95%  | 45.88% |
| SLC16A10    | 116.25%  | 45.88% |
| UHRF1BP1    | 192.42%  | 45.87% |
| SLC25A28    | 14.34%   | 45.86% |
| ZWINT       | 106.00%  | 45.85% |
| DPM2        | 73.59%   | 45.84% |
| KIAA1467    | 78.86%   | 45.84% |
| SEC61G      | 38.85%   | 45.84% |
| SUMO3       | 99.09%   | 45.80% |
| FUBP3       | 77.98%   | 45.77% |
| NEURL1B     | 32.06%   | 45.77% |
| CAB39       | 40.97%   | 45.72% |
| SLC38A10    | 19.51%   | 45.72% |
| ESNA1       | 115.86%  | 45.71% |
| BHLHE40     | 155.33%  | 45.69% |
| PGM1        | 44.39%   | 45.69% |
| ACTBL3      | 203.92%  | 45.69% |
| STEAP2      | 235.99%  | 45.65% |
| WDR48       | 22.27%   | 45.63% |
| ZEB2        | 154.86%  | 45.63% |
| PCID2       | 40.25%   | 45.60% |
| AP1S2       | 44.76%   | 45.60% |
| GPR172A     | 40.17%   | 45.58% |
| ST3GAL6     | 1255.43% | 45.58% |
| TACR1       | 205.88%  | 45.57% |
| TLX1        | 69.83%   | 45.56% |
| RP3-487J7.2 | 15.55%   | 45.55% |
| CDKL1       | 48.38%   | 45.54% |
| RPL15       | 355.77%  | 45.53% |
| BPHL        | 56.61%   | 45.49% |
| SMYD4       | 42.27%   | 45.44% |



|               |         |        |
|---------------|---------|--------|
| PARG          | 171.58% | 45.43% |
| SMAD6         | 13.70%  | 45.38% |
| WDR59         | 34.60%  | 45.36% |
| KIAA1128      | 365.87% | 45.35% |
| REPS2         | 92.22%  | 45.33% |
| IGSF2         | 182.26% | 45.33% |
| MT1A,MT1X     | 168.16% | 45.32% |
| CFHR5         | 34.99%  | 45.32% |
| C17orf45      | 102.27% | 45.31% |
| SEPT10        | 256.37% | 45.29% |
| CCNT2         | 193.04% | 45.28% |
| PLA2G16       | 34.38%  | 45.26% |
| C17orf101     | 66.43%  | 45.24% |
| PDZD2         | 409.31% | 45.23% |
| HS6ST1        | 94.07%  | 45.23% |
| SRD5A1        | 17.88%  | 45.22% |
| CD82          | 82.51%  | 45.16% |
| SLC7A7        | 45.89%  | 45.16% |
| DFNA5         | 55.32%  | 45.13% |
| ETHE1         | 20.96%  | 45.11% |
| LIN7C         | 129.48% | 45.09% |
| CHMP2A        | 38.96%  | 45.09% |
| MFSD1         | 244.39% | 44.99% |
| INPP1         | 204.11% | 44.98% |
| FBXL7         | 32.43%  | 44.98% |
| IMPA1         | 304.30% | 44.95% |
| C19orf15      | 62.40%  | 44.91% |
| OTUD3         | 51.69%  | 44.91% |
| PITPNB        | 38.20%  | 44.90% |
| SV2B          | 87.24%  | 44.89% |
| BRD1          | 45.08%  | 44.88% |
| APP           | 229.30% | 44.88% |
| CEP55         | 73.89%  | 44.87% |
| CLK2          | 16.35%  | 44.86% |
| MUC5AC,MUC5B  | 45.49%  | 44.83% |
| SUMO3         | 50.41%  | 44.82% |
| CYFIP1        | 66.61%  | 44.82% |
| STAU1         | 62.34%  | 44.81% |
| RAI2          | 90.35%  | 44.81% |
| AL356123.21-2 | 94.76%  | 44.81% |
| GPR37L1       | 46.15%  | 44.80% |
| TMEM81        | 12.08%  | 44.80% |
| AC008060.7    | 39.19%  | 44.79% |
| UBR7          | 63.47%  | 44.79% |
| FZD1          | 73.60%  | 44.77% |
| PRDX5         | 21.07%  | 44.77% |
| IL28A,IL28B   | 69.20%  | 44.76% |

|                   |          |        |
|-------------------|----------|--------|
| FAM18B2           | 54.70%   | 44.76% |
| THRB,AC112217.2   | 22.00%   | 44.75% |
| ENO2              | 50.15%   | 44.74% |
| TWIST2            | 13.32%   | 44.70% |
| ST3GAL5           | 20.12%   | 44.63% |
| ZNF217            | 45.29%   | 44.61% |
| NDUFAF2           | 110.20%  | 44.59% |
| RP11-700P18.1     | 231.31%  | 44.59% |
| TM2D3             | 64.32%   | 44.57% |
| AC110814.2        | 42.87%   | 44.54% |
| CHD6              | 191.65%  | 44.53% |
| MCRS1             | 14.30%   | 44.53% |
| LRRC8C            | 106.56%  | 44.49% |
| IRGQ              | 15.79%   | 44.48% |
| VTI1A             | 88.96%   | 44.48% |
| CHD9              | 46.97%   | 44.42% |
| CANX              | 132.35%  | 44.42% |
| RHO               | 92.42%   | 44.40% |
| FGF22             | 18.24%   | 44.39% |
| NUPL2             | 59.52%   | 44.35% |
| DMD               | 393.94%  | 44.34% |
| SPDYC             | 30.04%   | 44.31% |
| NRBF2             | 40.22%   | 44.22% |
| SELL              | 292.31%  | 44.21% |
| EXO1              | 42.12%   | 44.21% |
| PSENN             | 28.47%   | 44.17% |
| PATL1             | 23.62%   | 44.17% |
| MSH2              | 90.94%   | 44.16% |
| CRYBB2            | 91.22%   | 44.11% |
| C4orf42           | 33.33%   | 44.09% |
| TMBIM6            | 137.28%  | 44.06% |
| MARCH3            | 340.64%  | 44.05% |
| MESDC2            | 22.76%   | 44.02% |
| CRYZ,RP11-17E13.3 | 469.89%  | 44.01% |
| GSTK1             | 27.53%   | 44.00% |
| CSTF2T            | 13.12%   | 44.00% |
| MESDC1            | 627.81%  | 44.00% |
| VAMP7             | 322.41%  | 43.98% |
| ING2              | 88.04%   | 43.98% |
| TNFSF4            | 1075.16% | 43.95% |
| CLDN1             | 33.03%   | 43.92% |
| KIF5B             | 99.92%   | 43.91% |
| KLC3              | 113.21%  | 43.90% |
| CGN               | 40.21%   | 43.88% |
| CEBPD             | 15.57%   | 43.88% |
| AP000354.4        | 49.26%   | 43.87% |
| NCBP2             | 18.77%   | 43.86% |

|                            |         |        |
|----------------------------|---------|--------|
| LRRC40                     | 36.19%  | 43.86% |
| VIPR2                      | 22.44%  | 43.80% |
| SEPT2                      | 71.39%  | 43.80% |
| EIF6                       | 17.89%  | 43.77% |
| C5orf51                    | 87.18%  | 43.72% |
| OSBP                       | 22.07%  | 43.72% |
| AC078802.14                | 23.27%  | 43.71% |
| EPRS                       | 323.60% | 43.70% |
| GPRC5C                     | 34.63%  | 43.69% |
| CTD-2330K9.3               | 47.14%  | 43.69% |
| ADAMTS16                   | 65.26%  | 43.65% |
| BTBD10                     | 184.72% | 43.64% |
| POLR2C                     | 106.30% | 43.63% |
| TLL2                       | 189.39% | 43.63% |
| RAB5C                      | 29.92%  | 43.61% |
| PIGP                       | 290.03% | 43.57% |
| TBX3                       | 150.23% | 43.56% |
| ANKRD45                    | 133.16% | 43.56% |
| H1FNT                      | 33.86%  | 43.56% |
| LAMC1                      | 165.37% | 43.56% |
| ANKRD50                    | 148.00% | 43.55% |
| TMEM100                    | 65.07%  | 43.53% |
| GABRA4                     | 51.98%  | 43.52% |
| CTSZ                       | 46.24%  | 43.50% |
| GPIHBP1                    | 106.90% | 43.46% |
| RAD23B                     | 103.60% | 43.45% |
| AP006216.9                 | 278.13% | 43.38% |
| RRP15                      | 80.40%  | 43.36% |
| AC015849.2                 | 53.75%  | 43.34% |
| SMARCC1                    | 270.93% | 43.33% |
| SDF2                       | 159.86% | 43.32% |
| AC078819.24-1,AC012085.4,I | 119.26% | 43.30% |
| VPS45                      | 20.45%  | 43.30% |
| RP1-21O18.1                | 11.42%  | 43.30% |
| PSAT1                      | 78.14%  | 43.29% |
| MLLT4                      | 115.29% | 43.29% |
| SECISBP2L                  | 88.67%  | 43.28% |
| PCBP3                      | 85.71%  | 43.24% |
| TMEM38B                    | 42.39%  | 43.24% |
| AC093323.3                 | 69.74%  | 43.21% |
| NUDT4P1                    | 160.08% | 43.19% |
| LIPH                       | 34.27%  | 43.18% |
| AC005154.6                 | 47.40%  | 43.14% |
| C1orf128                   | 59.60%  | 43.13% |
| RPL39L                     | 24.79%  | 43.12% |
| RP11-103C16.2              | 66.56%  | 43.11% |
| DDX50                      | 16.52%  | 43.09% |

|                           |         |        |
|---------------------------|---------|--------|
| CKS1B                     | 23.88%  | 43.08% |
| GTF3C4                    | 172.64% | 43.08% |
| CSF3R                     | 61.20%  | 43.07% |
| IFT80                     | 43.52%  | 43.06% |
| NID1                      | 39.38%  | 43.02% |
| EIF5A2                    | 62.72%  | 43.00% |
| AC138940.3-2,RP1-9B16.2,M | 57.39%  | 43.00% |
| POMP                      | 90.03%  | 42.99% |
| PARP15                    | 27.69%  | 42.97% |
| XYL2                      | 38.93%  | 42.97% |
| C11orf42                  | 53.52%  | 42.95% |
| NAT8                      | 161.43% | 42.94% |
| C5orf50                   | 35.47%  | 42.92% |
| AC084398.25-1             | 73.33%  | 42.91% |
| KRTCAP2                   | 26.39%  | 42.91% |
| RP4-617C6.1               | 37.65%  | 42.91% |
| HTATSF1                   | 29.74%  | 42.88% |
| KLK10                     | 76.71%  | 42.87% |
| MAGIX                     | 86.67%  | 42.86% |
| ZNF587                    | 155.56% | 42.83% |
| TUBB,TUBB,TUBB,TUBB,TUBB  | 12.54%  | 42.81% |
| STON1-GTF2A1L,AC073082.6  | 62.56%  | 42.80% |
| DMRT3                     | 10.45%  | 42.80% |
| SFRS9P1,SFRS9             | 52.17%  | 42.76% |
| ARRDC3                    | 402.39% | 42.73% |
| STBD1                     | 171.36% | 42.73% |
| ART3                      | 20.56%  | 42.72% |
| YARS2                     | 122.97% | 42.70% |
| CTPS                      | 17.63%  | 42.70% |
| HTR5A                     | 65.59%  | 42.69% |
| ALG5                      | 33.91%  | 42.69% |
| CA5B                      | 66.09%  | 42.68% |
| HADHA                     | 41.61%  | 42.65% |
| CCNB1                     | 49.35%  | 42.64% |
| PCK1                      | 80.23%  | 42.60% |
| AFG3L1                    | 55.17%  | 42.57% |
| WDR7                      | 209.63% | 42.56% |
| ERH                       | 72.10%  | 42.56% |
| ALS2CR4                   | 99.75%  | 42.55% |
| C20orf4                   | 53.21%  | 42.54% |
| ZNF493                    | 60.67%  | 42.53% |
| GFM2                      | 91.53%  | 42.52% |
| RP11-307L3.2,AC069236.27  | 162.49% | 42.51% |
| EVX2                      | 43.31%  | 42.48% |
| CAMKV                     | 58.49%  | 42.47% |
| RTN4IP1                   | 79.26%  | 42.47% |
| ATAD2B                    | 76.66%  | 42.42% |

|                           |         |        |
|---------------------------|---------|--------|
| AFF1                      | 259.28% | 42.42% |
| NCRNA00118                | 43.23%  | 42.42% |
| RP5-981O7.3               | 473.55% | 42.42% |
| CPSF2                     | 67.56%  | 42.41% |
| CRTC1                     | 44.25%  | 42.40% |
| ZNF532                    | 111.13% | 42.39% |
| SNW1                      | 23.44%  | 42.35% |
| NT5DC3                    | 55.61%  | 42.34% |
| PPARG,AC090947.2          | 185.85% | 42.32% |
| SNORD22,SNORD29,SNORD3    | 39.59%  | 42.31% |
| P4HA2                     | 195.18% | 42.28% |
| KBTBD3                    | 68.43%  | 42.27% |
| C6orf108                  | 16.61%  | 42.27% |
| ZFP91                     | 208.17% | 42.20% |
| COL4A1                    | 331.04% | 42.18% |
| PNCK                      | 85.10%  | 42.12% |
| FAM10A5,LPHN2,AC084033.:  | 145.11% | 42.12% |
| ZNF330                    | 67.36%  | 42.09% |
| FBXL18                    | 61.09%  | 42.07% |
| MCPH1                     | 27.63%  | 42.06% |
| FOXK2                     | 72.48%  | 42.02% |
| CHEK2                     | 20.95%  | 42.00% |
| MPV17                     | 51.47%  | 42.00% |
| UBE2D3                    | 38.22%  | 41.97% |
| BCL6                      | 42.54%  | 41.97% |
| CENPA                     | 72.08%  | 41.97% |
| PYCR1                     | 75.00%  | 41.95% |
| TRAM1L1                   | 80.18%  | 41.94% |
| AC093323.3                | 177.93% | 41.94% |
| MCHR1                     | 12.05%  | 41.94% |
| SUMF1                     | 31.90%  | 41.92% |
| PLXNA2                    | 57.19%  | 41.91% |
| BPGM                      | 75.22%  | 41.91% |
| CKAP2                     | 324.45% | 41.87% |
| CCDC50                    | 85.30%  | 41.87% |
| PIK3R3                    | 62.54%  | 41.87% |
| GGH                       | 129.57% | 41.86% |
| HLA-G,HLA-G,HLA-G,HLA-G,H | 43.06%  | 41.86% |
| AC009108.10               | 62.79%  | 41.86% |
| TMEM179                   | 117.42% | 41.83% |
| PI4KA,KB-1183D5.12,AP0005 | 50.07%  | 41.82% |
| CTGLF10P,AGAP7,AGAP6,BM   | 45.64%  | 41.82% |
| VPS24                     | 199.04% | 41.82% |
| PRSS35                    | 184.18% | 41.79% |
| PGRMC2                    | 92.46%  | 41.77% |
| MAPK1IP1L                 | 316.71% | 41.75% |
| HS6ST3                    | 37.89%  | 41.72% |

|                            |          |        |
|----------------------------|----------|--------|
| RP11-4C20.3                | 51.45%   | 41.72% |
| RP5-1055C14.6,TMEM188      | 291.56%  | 41.71% |
| SLC33A1                    | 181.30%  | 41.71% |
| PLCXD2                     | 1017.80% | 41.70% |
| MED29                      | 33.71%   | 41.70% |
| SCD5                       | 232.74%  | 41.67% |
| C17orf58                   | 505.47%  | 41.65% |
| PPAPDC1A                   | 41.20%   | 41.64% |
| HADH                       | 30.76%   | 41.62% |
| FEZ2                       | 231.23%  | 41.61% |
| ID4                        | 172.71%  | 41.60% |
| MRPS21                     | 10.04%   | 41.60% |
| AC020922.9                 | 121.38%  | 41.60% |
| EFHD1                      | 19.83%   | 41.58% |
| AASDH                      | 102.30%  | 41.58% |
| CD34                       | 42.15%   | 41.57% |
| TMEM39A                    | 28.07%   | 41.55% |
| RCN1                       | 98.23%   | 41.54% |
| DHRS7                      | 433.25%  | 41.54% |
| HTR3E                      | 169.76%  | 41.53% |
| C15orf26                   | 51.30%   | 41.49% |
| CHMP4B                     | 271.09%  | 41.49% |
| RP11-513I15.5,RP11-182B22. | 73.07%   | 41.46% |
| LAPTM4B                    | 80.24%   | 41.44% |
| C14orf68                   | 45.53%   | 41.44% |
| KRTAP20-2                  | 67.04%   | 41.44% |
| SLC12A6                    | 237.83%  | 41.41% |
| DPY19L1                    | 297.03%  | 41.41% |
| PLDN                       | 188.31%  | 41.40% |
| RFX1                       | 14.75%   | 41.38% |
| RIMKLA                     | 24.40%   | 41.33% |
| WDR44                      | 55.82%   | 41.33% |
| RP4-758J18.6               | 44.24%   | 41.33% |
| SPIN2A,SPIN2B              | 37.68%   | 41.30% |
| MRPL3                      | 10.43%   | 41.28% |
| DCTN5                      | 112.18%  | 41.26% |
| HOXA10                     | 37.46%   | 41.24% |
| CCL20                      | 158.09%  | 41.23% |
| CORO1C                     | 81.12%   | 41.19% |
| PCDH9                      | 50.72%   | 41.19% |
| IL13RA2                    | 174.63%  | 41.17% |
| LEF1                       | 25.18%   | 41.17% |
| SUCLG2                     | 158.82%  | 41.16% |
| CDC123                     | 16.72%   | 41.16% |
| ZNRF1                      | 18.32%   | 41.16% |
| DNAJC4                     | 119.80%  | 41.15% |
| COL17A1                    | 101.67%  | 41.14% |

|                           |         |        |
|---------------------------|---------|--------|
| C1orf63                   | 37.76%  | 41.14% |
| RP5-1022P6.2              | 143.83% | 41.13% |
| ZMYND15                   | 35.13%  | 41.12% |
| C9orf127                  | 21.76%  | 41.11% |
| ZNF268                    | 193.93% | 41.11% |
| CLEC5A                    | 86.78%  | 41.10% |
| UBR4                      | 48.50%  | 41.08% |
| RP5-1028L10.1             | 151.88% | 41.07% |
| MR1                       | 30.58%  | 41.06% |
| STXBP1                    | 91.78%  | 41.05% |
| CAPN7                     | 152.05% | 41.03% |
| DNAJC18                   | 98.23%  | 41.02% |
| SERPINA11                 | 107.32% | 41.01% |
| C21orf105                 | 60.06%  | 41.00% |
| SNHG5                     | 22.99%  | 40.99% |
| NPBWR2                    | 62.66%  | 40.99% |
| THBS1                     | 72.35%  | 40.97% |
| CTD-2230M5.2,TNPO3        | 99.31%  | 40.97% |
| FPR1                      | 21.41%  | 40.94% |
| PNRC2,AL390877.1,BX51101: | 56.79%  | 40.92% |
| GPM6B                     | 50.78%  | 40.91% |
| SYK                       | 28.69%  | 40.90% |
| MSRB2                     | 44.24%  | 40.89% |
| GMPR2                     | 45.46%  | 40.87% |
| ETF1                      | 453.54% | 40.83% |
| CYTH2                     | 56.13%  | 40.83% |
| CNIH4                     | 179.61% | 40.82% |
| VILL                      | 84.13%  | 40.81% |
| TRAF3                     | 44.24%  | 40.81% |
| USO1                      | 53.41%  | 40.81% |
| RPIA                      | 72.01%  | 40.80% |
| AC087499.3,MEIS3P1        | 147.97% | 40.80% |
| MT1E                      | 39.58%  | 40.80% |
| ARAP2                     | 83.28%  | 40.79% |
| AMPD2                     | 67.64%  | 40.77% |
| C16orf52                  | 98.76%  | 40.75% |
| DSCR4                     | 53.02%  | 40.75% |
| MPHOSPH8                  | 96.49%  | 40.74% |
| BRP44L                    | 307.19% | 40.72% |
| HNRNPA3                   | 194.99% | 40.70% |
| BTK                       | 12.27%  | 40.68% |
| DUOXA1                    | 19.06%  | 40.68% |
| SYT15                     | 71.71%  | 40.68% |
| UBE2G2                    | 111.63% | 40.66% |
| SGPP1                     | 140.00% | 40.65% |
| UTP14C                    | 26.11%  | 40.65% |
| SFN                       | 47.69%  | 40.63% |

|                                                   |         |        |
|---------------------------------------------------|---------|--------|
| TYMP                                              | 40.94%  | 40.62% |
| TRADD                                             | 15.64%  | 40.59% |
| AMY2B,AMYP1                                       | 164.53% | 40.58% |
| ZBP1                                              | 19.13%  | 40.58% |
| WBSCR17                                           | 16.59%  | 40.57% |
| LCLAT1                                            | 175.55% | 40.57% |
| PLEKHC1                                           | 221.43% | 40.57% |
| RWDD2A                                            | 104.91% | 40.56% |
| PRCP                                              | 664.71% | 40.55% |
| MOXD1                                             | 65.00%  | 40.52% |
| USP37                                             | 89.06%  | 40.50% |
| CDC7                                              | 273.46% | 40.48% |
| AGPAT3                                            | 87.14%  | 40.47% |
| RAB43                                             | 55.61%  | 40.47% |
| TFDP1                                             | 194.34% | 40.44% |
| SPN,QPRT                                          | 228.57% | 40.43% |
| FREQ                                              | 40.48%  | 40.43% |
| LAT2                                              | 42.83%  | 40.41% |
| RP11-69J16.4,ZSWIM5,RP11-<br>AC004801.2-1,ATP6V1F | 366.28% | 40.40% |
| TBX20                                             | 47.30%  | 40.37% |
| ANTXRL                                            | 43.68%  | 40.37% |
| RPL10                                             | 36.69%  | 40.36% |
| CAT                                               | 84.33%  | 40.34% |
| ABCG4                                             | 64.07%  | 40.32% |
| TCTEX1D1                                          | 193.70% | 40.31% |
| PIK3R3                                            | 57.16%  | 40.31% |
| C11orf54                                          | 119.69% | 40.29% |
| DUSP1                                             | 54.97%  | 40.25% |
| MSN                                               | 24.24%  | 40.24% |
| NDUFB9                                            | 63.28%  | 40.24% |
| AC105345.3                                        | 91.52%  | 40.21% |
| LZIC                                              | 97.40%  | 40.18% |
| AC011998.1,PDE11A,API5L1,                         | 442.75% | 40.18% |
| DDX1                                              | 180.87% | 40.17% |
| KYNU                                              | 74.87%  | 40.15% |
| IP6K2                                             | 94.27%  | 40.15% |
| PCMT1                                             | 131.41% | 40.14% |
| TMEM225                                           | 78.50%  | 40.09% |
| TXNL5                                             | 36.00%  | 40.07% |
| PER3                                              | 655.75% | 40.07% |
| ANKRD10                                           | 378.73% | 40.07% |
| TSEN2                                             | 33.15%  | 40.04% |
| SNORD58B                                          | 79.82%  | 40.02% |
| TRIB3                                             | 106.60% | 40.02% |
| DNASE1                                            | 47.80%  | 40.01% |
| VASH1                                             | 97.42%  | 40.01% |



|                           |         |        |
|---------------------------|---------|--------|
| ZNF324                    | 16.07%  | 40.00% |
| RP11-87H9.2               | 38.45%  | 39.98% |
| AC138904.3,NPIPL2,AC14528 | 16.55%  | 39.97% |
| 7SK                       | 170.56% | 39.97% |
| GLUDP2                    | 68.24%  | 39.96% |
| PREP                      | 27.50%  | 39.95% |
| FAM22A,FAM22E,FAM22D,F    | 15.60%  | 39.92% |
| C20orf102                 | 20.76%  | 39.92% |
| SFRS9                     | 35.36%  | 39.90% |
| HSPA2                     | 89.67%  | 39.87% |
| AF186191.6-2,ST3GAL1      | 92.53%  | 39.83% |
| UBOX5,FASTKD5             | 93.08%  | 39.82% |
| GTF2H5                    | 35.03%  | 39.81% |
| BRWD1                     | 32.43%  | 39.78% |
| C17orf56                  | 11.78%  | 39.77% |
| DAB1,HNRNPA1L1            | 14.55%  | 39.76% |
| MOBP                      | 32.53%  | 39.76% |
| CRIP2                     | 55.21%  | 39.75% |
| C7orf47                   | 32.34%  | 39.73% |
| PNRC2,AL390877.1,BX51101  | 193.01% | 39.73% |
| STAMBP                    | 40.96%  | 39.73% |
| MTMR3                     | 13.94%  | 39.71% |
| ZDHHC3                    | 41.29%  | 39.70% |
| RARS2                     | 59.37%  | 39.68% |
| ZNF143                    | 58.47%  | 39.68% |
| KLHL6                     | 87.20%  | 39.65% |
| OTUD7A                    | 69.27%  | 39.65% |
| C9orf110                  | 64.61%  | 39.65% |
| SMCR8                     | 299.58% | 39.64% |
| TM2D2                     | 28.39%  | 39.63% |
| EIF2B5,ECE2               | 105.90% | 39.63% |
| TSC1                      | 90.11%  | 39.60% |
| RNF149                    | 329.59% | 39.59% |
| TMEM64                    | 161.27% | 39.59% |
| ARL3                      | 45.12%  | 39.58% |
| AC006050.3,AC006050.2     | 57.97%  | 39.56% |
| TEX264                    | 48.06%  | 39.55% |
| NRIP1                     | 29.56%  | 39.51% |
| TTC9                      | 100.35% | 39.51% |
| DPP4                      | 26.76%  | 39.48% |
| CCT4                      | 168.65% | 39.45% |
| CSTF2                     | 13.07%  | 39.45% |
| PSKH1                     | 23.83%  | 39.42% |
| COX7A2                    | 202.34% | 39.41% |
| MAML1                     | 35.35%  | 39.38% |
| CPNE7                     | 13.59%  | 39.38% |
| REXO2                     | 205.64% | 39.37% |

|                           |          |        |
|---------------------------|----------|--------|
| MRPL43                    | 56.39%   | 39.34% |
| TBCEL                     | 454.49%  | 39.31% |
| LGALS3                    | 42.47%   | 39.30% |
| RFX5                      | 54.75%   | 39.30% |
| RPUSD1                    | 53.63%   | 39.30% |
| ZNF37A                    | 29.15%   | 39.29% |
| PIGA                      | 1180.04% | 39.29% |
| SETD3                     | 33.24%   | 39.28% |
| TCEAL3,TCEAL6             | 38.15%   | 39.28% |
| MRFAP1                    | 20.08%   | 39.25% |
| AGPAT4                    | 60.98%   | 39.24% |
| FECH                      | 199.12%  | 39.23% |
| TM7SF3                    | 96.79%   | 39.18% |
| LPP                       | 69.59%   | 39.18% |
| ALDH2                     | 32.53%   | 39.16% |
| GSH2                      | 28.01%   | 39.16% |
| UGP2                      | 56.54%   | 39.13% |
| SPRY2                     | 657.65%  | 39.13% |
| KIAA0586,RP13-221M14.5,A( | 84.39%   | 39.10% |
| LRRC51                    | 140.25%  | 39.09% |
| GNG4                      | 62.55%   | 39.09% |
| SCARF2                    | 10.40%   | 39.09% |
| SIGLECP16                 | 47.57%   | 39.08% |
| SST                       | 1120.10% | 39.08% |
| BIRC5                     | 91.26%   | 39.07% |
| PABPC3,PABPCP5            | 108.45%  | 39.05% |
| MATN1                     | 33.72%   | 39.04% |
| PRKAG1                    | 90.69%   | 39.03% |
| RGL1                      | 466.14%  | 39.03% |
| MUDENG                    | 74.84%   | 39.03% |
| AC098823.3                | 67.54%   | 39.02% |
| FAM148B                   | 84.66%   | 39.02% |
| C8orf13                   | 87.08%   | 39.02% |
| DOT1L                     | 53.42%   | 39.00% |
| SLIT1                     | 27.55%   | 38.98% |
| RABGGTB                   | 23.53%   | 38.97% |
| TMEM209                   | 95.04%   | 38.94% |
| PSG5,PSG1                 | 38.41%   | 38.91% |
| EEF1E1,AC104651.1         | 406.71%  | 38.87% |
| IL27                      | 133.33%  | 38.86% |
| PHF2                      | 73.45%   | 38.85% |
| PTDSS1                    | 73.61%   | 38.85% |
| MFRP                      | 87.05%   | 38.84% |
| UBE2A                     | 225.53%  | 38.83% |
| PCCB                      | 95.44%   | 38.81% |
| TMEM159                   | 34.67%   | 38.81% |
| AMZ2                      | 145.53%  | 38.79% |

|                           |          |        |
|---------------------------|----------|--------|
| ADNP2                     | 221.28%  | 38.79% |
| SHC1                      | 61.94%   | 38.78% |
| LILRB3                    | 25.55%   | 38.77% |
| PEX13                     | 209.45%  | 38.75% |
| KCNT1                     | 84.89%   | 38.73% |
| MAP4                      | 33.04%   | 38.71% |
| NAP1L1                    | 189.09%  | 38.68% |
| C22orf29,GNB1L            | 68.70%   | 38.67% |
| HINT2,CNTN4,AC026882.1    | 31.33%   | 38.65% |
| MRPL22                    | 21.16%   | 38.65% |
| DNAJC6                    | 58.53%   | 38.58% |
| EIF6                      | 18.10%   | 38.57% |
| NDRG1                     | 24.61%   | 38.56% |
| AC096582.1-1,AC093752.2-2 | 43.75%   | 38.54% |
| LRRC56                    | 32.15%   | 38.53% |
| MCRS1                     | 47.02%   | 38.53% |
| RP11-33N11.1,HNRNPD       | 33.69%   | 38.53% |
| SOX7                      | 23.47%   | 38.52% |
| NKX2-1                    | 26.65%   | 38.49% |
| WASF3                     | 536.65%  | 38.48% |
| EDEM2                     | 39.01%   | 38.46% |
| MGAT3                     | 53.61%   | 38.43% |
| CADM3                     | 47.87%   | 38.41% |
| FARSA                     | 33.12%   | 38.35% |
| CXCR7                     | 30.94%   | 38.35% |
| AKR7A2                    | 12.57%   | 38.34% |
| PAG1                      | 189.93%  | 38.31% |
| CASP3                     | 117.58%  | 38.29% |
| STK24                     | 114.13%  | 38.27% |
| MAN2A1                    | 297.82%  | 38.27% |
| ETV3                      | 333.62%  | 38.24% |
| NECAP1                    | 324.83%  | 38.23% |
| MIRHG1                    | 731.94%  | 38.23% |
| RDM1                      | 113.21%  | 38.23% |
| BAT2L                     | 13.27%   | 38.22% |
| DNAJB9                    | 1931.26% | 38.20% |
| CLIC4                     | 674.20%  | 38.19% |
| CHSY1                     | 99.90%   | 38.18% |
| EHBP1                     | 135.67%  | 38.17% |
| NFIA                      | 331.36%  | 38.15% |
| SLC29A1                   | 126.12%  | 38.14% |
| PCGF6,AC073539.3          | 178.39%  | 38.12% |
| NOLC1                     | 102.47%  | 38.10% |
| TPBG                      | 387.13%  | 38.07% |
| ARPC2                     | 53.74%   | 38.05% |
| ATP5C1                    | 79.53%   | 38.04% |
| RPL3                      | 42.63%   | 38.03% |

|                           |         |        |
|---------------------------|---------|--------|
| RP11-115M6.4,MPP1,HMGN    | 106.28% | 38.03% |
| SRP_euk_arch              | 45.86%  | 38.02% |
| GLRX5,RP4-655L22.4        | 114.01% | 38.00% |
| NPLOC4                    | 76.89%  | 38.00% |
| FAM53C                    | 55.88%  | 38.00% |
| SRGAP1                    | 71.83%  | 37.97% |
| UMPS                      | 42.55%  | 37.96% |
| ATP6V1A                   | 155.27% | 37.92% |
| KANK1                     | 112.93% | 37.92% |
| SGSM1                     | 72.46%  | 37.90% |
| TRPS1                     | 372.09% | 37.89% |
| AKR1C3                    | 21.89%  | 37.89% |
| LAMA1                     | 43.29%  | 37.86% |
| KREMEN1                   | 25.36%  | 37.85% |
| IFI44L                    | 218.03% | 37.82% |
| ANKRD13B                  | 22.55%  | 37.81% |
| PSMD10                    | 299.48% | 37.81% |
| IDS                       | 168.39% | 37.80% |
| ACOT9                     | 24.78%  | 37.79% |
| C10orf128                 | 126.89% | 37.75% |
| PBX2,AGER,PBX2,AGER,PBX2  | 26.58%  | 37.74% |
| KDELR2,DAGLB              | 95.07%  | 37.72% |
| CALN1                     | 116.87% | 37.72% |
| RP11-250J16.1             | 45.49%  | 37.68% |
| DPP6                      | 15.94%  | 37.66% |
| OBSCN                     | 53.85%  | 37.64% |
| C2orf30                   | 359.58% | 37.62% |
| PEX7                      | 66.41%  | 37.62% |
| SLFN12                    | 161.37% | 37.60% |
| AC105233.12-3,AF228730.8- | 50.13%  | 37.55% |
| C12orf5                   | 98.15%  | 37.54% |
| FAM103A1,RP3-427A4.2,RPS  | 46.07%  | 37.53% |
| SPCS2,RP5-1053E7.1        | 198.25% | 37.52% |
| STX11                     | 612.40% | 37.52% |
| PRAMEF1                   | 168.00% | 37.50% |
| FOXK2                     | 76.79%  | 37.50% |
| AC006328.8                | 24.87%  | 37.48% |
| PRPF39                    | 236.67% | 37.47% |
| TTC5                      | 57.30%  | 37.46% |
| SNRPC                     | 13.53%  | 37.41% |
| OTOR                      | 87.99%  | 37.41% |
| BX640514.3                | 71.62%  | 37.40% |
| LRP3                      | 30.93%  | 37.40% |
| C5orf24                   | 12.23%  | 37.40% |
| BARX2                     | 22.87%  | 37.38% |
| WDR52                     | 28.07%  | 37.38% |
| MYBPC2,SPIB               | 10.13%  | 37.35% |

|                           |          |        |
|---------------------------|----------|--------|
| RNF2                      | 25.76%   | 37.34% |
| XRCC5                     | 163.85%  | 37.33% |
| SLC12A2                   | 42.67%   | 37.28% |
| PPP1R2,PPP1R2P3           | 237.45%  | 37.28% |
| RP4-545K15.3,ARMCX6       | 62.96%   | 37.27% |
| C11orf79                  | 78.77%   | 37.26% |
| BXDC5                     | 161.81%  | 37.25% |
| OR10A4                    | 68.84%   | 37.25% |
| ABCB11                    | 32.38%   | 37.23% |
| PNRC2,AL390877.1,BX51101: | 59.06%   | 37.21% |
| FBXO46                    | 10.72%   | 37.21% |
| IDH2                      | 146.72%  | 37.18% |
| C1orf107                  | 19.41%   | 37.17% |
| ZCCHC9                    | 154.58%  | 37.16% |
| RP11-69J16.4,ZSWIM5,OSTC  | 356.44%  | 37.15% |
| AGPAT9                    | 312.12%  | 37.15% |
| TSPAN31                   | 66.50%   | 37.14% |
| FGF11                     | 91.54%   | 37.14% |
| HMGN1,AC091544.11-2,AC09  | 134.85%  | 37.14% |
| NELL2                     | 207.56%  | 37.14% |
| MFAP2                     | 64.76%   | 37.13% |
| AC005077.11               | 25.27%   | 37.11% |
| PBEF1,NAMPTL              | 281.84%  | 37.09% |
| SRI                       | 176.77%  | 37.07% |
| HADHB                     | 77.95%   | 37.06% |
| SLC2A10                   | 170.43%  | 37.03% |
| RIC8B                     | 60.68%   | 37.02% |
| BAT2D1                    | 179.59%  | 37.02% |
| CCDC63                    | 71.14%   | 37.00% |
| C7orf33                   | 216.57%  | 37.00% |
| GPC3                      | 44.38%   | 36.99% |
| WDR43                     | 187.84%  | 36.98% |
| MXI1                      | 80.34%   | 36.98% |
| TP53BP2                   | 1211.69% | 36.93% |
| USP34                     | 67.94%   | 36.93% |
| SVIL                      | 26.05%   | 36.93% |
| CUGBP1                    | 116.60%  | 36.93% |
| C10orf11                  | 83.82%   | 36.92% |
| ZNF211                    | 34.23%   | 36.92% |
| CMTM7                     | 71.72%   | 36.89% |
| RB1                       | 687.10%  | 36.89% |
| ERN1                      | 43.48%   | 36.86% |
| ACP2                      | 35.39%   | 36.85% |
| GPR26                     | 27.50%   | 36.83% |
| NDUFA8                    | 61.98%   | 36.82% |
| BZW2                      | 25.63%   | 36.82% |
| ETV3                      | 169.58%  | 36.80% |

|                        |         |        |
|------------------------|---------|--------|
| SLC35E4                | 66.33%  | 36.80% |
| ENC1                   | 341.20% | 36.79% |
| C16orf61               | 71.91%  | 36.79% |
| HEY1                   | 604.28% | 36.78% |
| ELOVL3                 | 51.39%  | 36.76% |
| SC4MOL                 | 211.86% | 36.76% |
| FOXA2                  | 69.27%  | 36.76% |
| CBFB                   | 378.72% | 36.75% |
| GDPD5                  | 35.31%  | 36.74% |
| AC005392.13,AC004603.4 | 23.41%  | 36.73% |
| MGST1                  | 243.26% | 36.72% |
| C21orf29,KRTAP10-2     | 68.40%  | 36.72% |
| ZNF22                  | 50.80%  | 36.71% |
| DOCK10                 | 96.16%  | 36.71% |
| NDUFA7                 | 11.87%  | 36.69% |
| AC087269.5             | 53.82%  | 36.66% |
| SRPK2                  | 56.39%  | 36.64% |
| DPYD                   | 303.00% | 36.64% |
| C3orf23                | 84.13%  | 36.61% |
| ACCN4                  | 10.33%  | 36.58% |
| C11orf49               | 26.94%  | 36.57% |
| FRMD3                  | 58.04%  | 36.54% |
| CENPV                  | 86.09%  | 36.53% |
| MAFG                   | 95.98%  | 36.49% |
| TSHZ3                  | 116.85% | 36.48% |
| MGEA5                  | 93.91%  | 36.46% |
| TCP11L1                | 26.01%  | 36.46% |
| RP11-318K12.3          | 10.62%  | 36.45% |
| ATP5F1,AC025287.8-4    | 30.98%  | 36.41% |
| CDC42SE1               | 113.95% | 36.41% |
| HS3ST3B1               | 48.02%  | 36.39% |
| PPP1CC                 | 162.77% | 36.38% |
| CENPN                  | 83.57%  | 36.38% |
| MAP1LC3A               | 58.58%  | 36.36% |
| RBMX2                  | 29.47%  | 36.34% |
| C14orf147              | 192.55% | 36.33% |
| CLINT1                 | 414.06% | 36.32% |
| MDH1                   | 174.62% | 36.30% |
| EIF2B5,AP2M1           | 30.96%  | 36.30% |
| KIAA0355               | 22.20%  | 36.29% |
| CD74                   | 142.80% | 36.27% |
| HIBADH                 | 262.25% | 36.25% |
| RASA1                  | 118.73% | 36.25% |
| DDX54                  | 14.92%  | 36.24% |
| LRTM2                  | 26.84%  | 36.23% |
| BLVRA                  | 67.13%  | 36.22% |
| AUH                    | 160.31% | 36.21% |

|                            |          |        |
|----------------------------|----------|--------|
| MEI1                       | 22.36%   | 36.18% |
| AC018641.6,SLC25A5         | 61.83%   | 36.18% |
| AP005435.2-1,AP006587.1-2, | 52.25%   | 36.14% |
| ULBP3                      | 10.28%   | 36.14% |
| SAE1                       | 33.94%   | 36.13% |
| MED15                      | 55.14%   | 36.13% |
| EBPL,AC093536.4            | 19.17%   | 36.12% |
| AC093401.4-1,B3GNT1        | 1209.38% | 36.12% |
| AC005035.2                 | 312.91%  | 36.11% |
| CYP4X1                     | 42.21%   | 36.10% |
| C12orf33                   | 223.53%  | 36.08% |
| MTHFS                      | 77.01%   | 36.08% |
| BPHL                       | 68.80%   | 36.07% |
| ZNF806,ZNF285B             | 56.24%   | 36.07% |
| PHLDA1                     | 35.31%   | 36.04% |
| AC004917.2                 | 542.66%  | 36.03% |
| TAX1BP3                    | 18.65%   | 36.00% |
| SHMT1                      | 34.20%   | 35.99% |
| FRMD6                      | 65.15%   | 35.98% |
| FAM44A                     | 43.30%   | 35.92% |
| SLC17A4                    | 62.31%   | 35.91% |
| LRIG1                      | 87.53%   | 35.85% |
| STT3A                      | 89.74%   | 35.84% |
| SKIV2L2                    | 43.94%   | 35.84% |
| PEX3                       | 36.38%   | 35.84% |
| LUM                        | 185.77%  | 35.82% |
| ATF7                       | 206.20%  | 35.82% |
| PCDHB15                    | 75.06%   | 35.82% |
| STCH                       | 104.68%  | 35.80% |
| DNAJA2                     | 115.98%  | 35.75% |
| RPS27L                     | 72.67%   | 35.73% |
| WDR68,KCNH6                | 52.36%   | 35.69% |
| PSMC5                      | 27.70%   | 35.65% |
| GS1-309P15.3,RDX           | 350.00%  | 35.63% |
| UBE2H                      | 119.77%  | 35.63% |
| ANKS1A                     | 14.47%   | 35.60% |
| ZNF295                     | 159.35%  | 35.57% |
| CLDN14                     | 66.59%   | 35.56% |
| ENOSF1                     | 36.26%   | 35.55% |
| GNG12                      | 63.44%   | 35.55% |
| NKG7                       | 40.70%   | 35.54% |
| ARHGAP9                    | 23.76%   | 35.53% |
| C14orf118                  | 136.48%  | 35.53% |
| FAM69A                     | 36.29%   | 35.53% |
| TMEM66                     | 87.75%   | 35.51% |
| PUM1                       | 168.06%  | 35.47% |
| TMEM184B                   | 125.02%  | 35.47% |

|                          |         |        |
|--------------------------|---------|--------|
| CDC42SE2                 | 77.39%  | 35.46% |
| PSMC2                    | 56.02%  | 35.42% |
| TPST1                    | 39.11%  | 35.40% |
| SULT1A4,SULT1A3          | 23.58%  | 35.39% |
| ATP2A2                   | 364.29% | 35.38% |
| CYP4F12                  | 35.92%  | 35.37% |
| RAC1                     | 68.21%  | 35.37% |
| SC5DL                    | 698.42% | 35.34% |
| RNF168                   | 80.15%  | 35.34% |
| RAB1A                    | 214.50% | 35.34% |
| RPS6KC1                  | 63.95%  | 35.30% |
| C20orf58                 | 22.62%  | 35.29% |
| PSMD5                    | 101.49% | 35.25% |
| PSEN1                    | 43.78%  | 35.23% |
| ENPEP                    | 160.55% | 35.21% |
| SAE1                     | 50.38%  | 35.21% |
| AC138028.1-3             | 37.18%  | 35.20% |
| COPS2                    | 75.71%  | 35.19% |
| PDIK1L                   | 39.34%  | 35.19% |
| BTBD1                    | 360.44% | 35.18% |
| KLHL5                    | 39.29%  | 35.17% |
| TMOD3                    | 162.14% | 35.16% |
| PSME1                    | 50.06%  | 35.09% |
| TMEM125                  | 64.92%  | 35.08% |
| AC021054.28              | 106.26% | 35.06% |
| AC034110.1               | 68.17%  | 35.06% |
| WDFY2                    | 61.34%  | 35.04% |
| INF2                     | 38.10%  | 35.04% |
| SEC23IP                  | 260.10% | 35.04% |
| GALT                     | 31.46%  | 35.01% |
| C1orf69                  | 16.99%  | 35.00% |
| GLRA4                    | 156.97% | 34.98% |
| C2orf50                  | 28.56%  | 34.97% |
| NPAT                     | 80.03%  | 34.96% |
| HSP90AB1,HSP90AB3P       | 171.64% | 34.96% |
| IL4R                     | 109.10% | 34.96% |
| RAX2,C19orf28            | 25.62%  | 34.95% |
| SNX4                     | 228.72% | 34.95% |
| SPC25                    | 80.49%  | 34.93% |
| C8orf8                   | 41.68%  | 34.92% |
| MTHFS                    | 65.15%  | 34.91% |
| SLC35A3                  | 148.84% | 34.91% |
| PLCL1                    | 22.75%  | 34.88% |
| ACBD6                    | 16.69%  | 34.87% |
| C20orf3                  | 62.19%  | 34.81% |
| PPIL5                    | 169.97% | 34.80% |
| DAB1,AC004073.4,AC007272 | 138.36% | 34.79% |



|                            |         |        |
|----------------------------|---------|--------|
| SHB                        | 14.02%  | 34.76% |
| PLAGL1                     | 330.46% | 34.69% |
| TPRKB                      | 125.65% | 34.69% |
| TMEM97                     | 100.23% | 34.66% |
| RBBP7                      | 58.99%  | 34.64% |
| STK19,C4A,STK19,STK19,C4A, | 48.49%  | 34.63% |
| RNMT                       | 70.08%  | 34.60% |
| PITPNM2                    | 276.70% | 34.54% |
| IL8                        | 602.43% | 34.53% |
| C11orf41                   | 16.32%  | 34.53% |
| C17orf71                   | 105.59% | 34.52% |
| FUSIP1,BX511012.5-2        | 115.35% | 34.52% |
| FAM10A5,LPHN2,ST13,FAM1    | 135.71% | 34.52% |
| TASP1                      | 58.11%  | 34.51% |
| SLC6A11                    | 107.72% | 34.49% |
| RP11-172F4.2,TINP1         | 88.71%  | 34.48% |
| HAND1                      | 115.48% | 34.43% |
| BCR                        | 22.86%  | 34.42% |
| RPS15A                     | 30.44%  | 34.42% |
| TRAPPC4                    | 44.48%  | 34.41% |
| SLC36A4                    | 27.65%  | 34.40% |
| C7orf52                    | 20.99%  | 34.40% |
| AADAT                      | 117.89% | 34.40% |
| C6orf61                    | 82.19%  | 34.40% |
| C1QTNF7                    | 134.83% | 34.38% |
| SULT1A1                    | 34.25%  | 34.38% |
| LMO7                       | 128.16% | 34.38% |
| H3F3A                      | 31.96%  | 34.38% |
| TEC                        | 17.39%  | 34.36% |
| RAD9A                      | 168.25% | 34.34% |
| XXbac-BPG34I8.2,AC004957.1 | 64.38%  | 34.30% |
| FH                         | 165.77% | 34.30% |
| CLP1                       | 99.40%  | 34.30% |
| ZNF444                     | 20.54%  | 34.29% |
| EIF4G3                     | 47.98%  | 34.29% |
| SNORD58B,SNORD58           | 156.24% | 34.27% |
| ZNF337                     | 12.16%  | 34.27% |
| DIO3                       | 15.09%  | 34.26% |
| EIF2AK3                    | 985.21% | 34.20% |
| PRKDC                      | 390.17% | 34.19% |
| OLAH                       | 85.74%  | 34.18% |
| BCL2L13                    | 72.63%  | 34.17% |
| ARTS-1                     | 19.17%  | 34.16% |
| TOMM40                     | 27.51%  | 34.16% |
| RILPL2                     | 105.49% | 34.15% |
| GLOD4                      | 14.88%  | 34.14% |
| CUGBP2                     | 96.80%  | 34.14% |

|                           |          |        |
|---------------------------|----------|--------|
| RARS                      | 40.17%   | 34.10% |
| DENND5B                   | 96.54%   | 34.10% |
| FVT1                      | 11.67%   | 34.08% |
| SNAP29                    | 116.35%  | 34.08% |
| RP11-416N13.1,MPZL1       | 42.28%   | 34.08% |
| CADM4                     | 22.81%   | 34.07% |
| AP1S1                     | 24.02%   | 34.04% |
| DNM1P33,DNM1P24           | 43.94%   | 34.04% |
| NDUFB2                    | 17.32%   | 34.01% |
| CMAS                      | 43.42%   | 34.00% |
| MARCKS                    | 90.09%   | 34.00% |
| OPN4                      | 62.10%   | 34.00% |
| RP6-159A1.2,RBMX,RP11-39C | 309.54%  | 33.98% |
| CCT5                      | 226.63%  | 33.98% |
| CDH10                     | 16.23%   | 33.95% |
| MAP2K5                    | 120.26%  | 33.95% |
| COPG                      | 24.52%   | 33.94% |
| SLIT3                     | 30.52%   | 33.92% |
| ERAS                      | 13.61%   | 33.91% |
| AK3                       | 67.88%   | 33.90% |
| DDX21                     | 1418.57% | 33.87% |
| KCNQ1                     | 12.54%   | 33.85% |
| AP000926.6-2              | 46.84%   | 33.84% |
| PUS7                      | 112.11%  | 33.83% |
| EAPP                      | 22.36%   | 33.80% |
| MPZL1                     | 65.18%   | 33.78% |
| FAM129A                   | 156.22%  | 33.77% |
| AMY1A,AMY1C,AMYP1,AMY2B   | 127.32%  | 33.76% |
| TEAD3                     | 38.00%   | 33.76% |
| UCK2                      | 46.07%   | 33.75% |
| DNAJB3,AC114812.5         | 54.90%   | 33.74% |
| PELI1                     | 1550.29% | 33.74% |
| FUT8                      | 71.09%   | 33.74% |
| LENG9                     | 89.53%   | 33.72% |
| LEFTY1                    | 71.43%   | 33.72% |
| TMEM101                   | 22.75%   | 33.71% |
| BCL2L13                   | 61.84%   | 33.69% |
| ZNF649,ZNF577             | 22.48%   | 33.68% |
| GLO1                      | 363.38%  | 33.67% |
| TGFBI                     | 87.85%   | 33.67% |
| RPL26L1                   | 28.58%   | 33.66% |
| BICC1                     | 66.67%   | 33.62% |
| OR2C3                     | 268.10%  | 33.62% |
| ASTN1                     | 45.29%   | 33.59% |
| ANXA4                     | 131.70%  | 33.59% |
| LDOC1L                    | 27.56%   | 33.57% |
| SIM2                      | 28.08%   | 33.56% |

|                           |          |        |
|---------------------------|----------|--------|
| PFN1,RP4-560B9.2          | 60.28%   | 33.55% |
| C6orf62                   | 247.44%  | 33.55% |
| ZNF576                    | 46.64%   | 33.54% |
| FSD1L                     | 16.65%   | 33.49% |
| ETNK1                     | 20.16%   | 33.48% |
| RAB3GAP1                  | 78.60%   | 33.48% |
| RAD54L                    | 41.66%   | 33.45% |
| DNAJB6                    | 93.90%   | 33.45% |
| ARAP1                     | 23.31%   | 33.41% |
| AQP9                      | 118.68%  | 33.38% |
| SLC39A1                   | 74.95%   | 33.34% |
| NAP1L5                    | 903.28%  | 33.33% |
| SIPA1L2                   | 194.77%  | 33.33% |
| HSPB11                    | 170.24%  | 33.31% |
| KRTAP26-1                 | 14.67%   | 33.30% |
| OR3A3                     | 62.55%   | 33.26% |
| AC139337.5-1,PROS1        | 147.39%  | 33.21% |
| PLVAP                     | 48.86%   | 33.21% |
| PDGFRA                    | 400.37%  | 33.20% |
| MAP3K7IP3                 | 95.97%   | 33.15% |
| RPL37AP5                  | 61.15%   | 33.14% |
| ZFP36L1                   | 230.02%  | 33.14% |
| PRKAR1A                   | 99.31%   | 33.10% |
| KLK5                      | 25.72%   | 33.07% |
| RANBP1,RP11-298C3.2       | 38.56%   | 33.03% |
| C9orf78                   | 45.83%   | 33.02% |
| RP6-159A1.2,RBMX,RP11-25! | 149.49%  | 33.01% |
| CASP10                    | 96.90%   | 32.98% |
| THAP3                     | 60.25%   | 32.97% |
| DPYSL2                    | 84.38%   | 32.97% |
| GLRX2                     | 90.47%   | 32.97% |
| BACE2                     | 40.93%   | 32.96% |
| ZNF238                    | 19.54%   | 32.95% |
| LIF                       | 158.04%  | 32.93% |
| ACSL4                     | 428.78%  | 32.90% |
| C12orf72                  | 45.18%   | 32.86% |
| MID1                      | 36.94%   | 32.86% |
| COQ7                      | 38.84%   | 32.85% |
| ARHGEF16                  | 63.73%   | 32.85% |
| DDX24                     | 179.27%  | 32.82% |
| SEC61B                    | 26.52%   | 32.82% |
| CYP4B1                    | 35.82%   | 32.79% |
| DUSP6                     | 1084.00% | 32.77% |
| MRPS28                    | 67.94%   | 32.75% |
| IGF1R                     | 64.17%   | 32.74% |
| SERPINI1                  | 430.30%  | 32.73% |
| RAB2                      | 44.16%   | 32.73% |

|               |         |        |
|---------------|---------|--------|
| RNF32         | 33.19%  | 32.72% |
| SGIP1         | 204.78% | 32.72% |
| C1orf27       | 48.10%  | 32.65% |
| C21orf32      | 41.64%  | 32.64% |
| PPP6C         | 93.94%  | 32.62% |
| DLG1          | 45.95%  | 32.59% |
| CTDSPL        | 36.05%  | 32.59% |
| MAN2C1        | 13.67%  | 32.57% |
| CTDSP2        | 89.39%  | 32.57% |
| TBC1D2B       | 33.68%  | 32.56% |
| YLPM1         | 32.22%  | 32.55% |
| MALAT1        | 170.52% | 32.55% |
| AC130454.2    | 46.15%  | 32.54% |
| TAPT1         | 12.66%  | 32.51% |
| RBM19         | 35.68%  | 32.50% |
| FLII          | 14.34%  | 32.49% |
| GNB2          | 29.14%  | 32.48% |
| ANXA7         | 185.33% | 32.48% |
| C8orf44       | 12.47%  | 32.47% |
| ST3GAL6       | 527.39% | 32.44% |
| C21orf45      | 13.99%  | 32.42% |
| SLC15A4       | 146.22% | 32.41% |
| CHEK2         | 25.87%  | 32.41% |
| HPGD          | 109.51% | 32.40% |
| TMPRSS5       | 12.81%  | 32.38% |
| SIRPA         | 77.59%  | 32.38% |
| AC012379.7    | 87.97%  | 32.36% |
| SERTAD1       | 40.60%  | 32.32% |
| SLC16A11      | 60.86%  | 32.32% |
| FAM114A2      | 15.72%  | 32.31% |
| CASP6         | 178.36% | 32.31% |
| FA2H          | 32.76%  | 32.30% |
| FAM101B       | 59.20%  | 32.30% |
| ADAD2         | 14.51%  | 32.29% |
| AC104961.7    | 57.10%  | 32.28% |
| LIMK2         | 68.93%  | 32.28% |
| SMOC2         | 18.70%  | 32.28% |
| RPL11         | 40.00%  | 32.27% |
| FAM168A       | 62.99%  | 32.27% |
| DNAJC3        | 60.10%  | 32.24% |
| PLA2G1B       | 62.92%  | 32.21% |
| CHD7          | 121.26% | 32.21% |
| RP11-406A20.4 | 33.73%  | 32.20% |
| CMKLR1        | 34.85%  | 32.20% |
| FAM177B       | 41.68%  | 32.20% |
| C20orf11      | 29.62%  | 32.16% |
| GPR176        | 65.83%  | 32.16% |

|                              |          |        |
|------------------------------|----------|--------|
| KIAA0564                     | 160.38%  | 32.14% |
| PLK2                         | 78.86%   | 32.10% |
| OAZ3                         | 18.25%   | 32.10% |
| CENPE                        | 109.93%  | 32.10% |
| MYO5B                        | 26.98%   | 32.09% |
| KIAA0528                     | 22.20%   | 32.07% |
| UBL5                         | 14.45%   | 32.02% |
| HCK                          | 58.87%   | 32.00% |
| ASPH                         | 296.93%  | 31.99% |
| OTOS                         | 11.87%   | 31.98% |
| XAGE1B,XAGE1C,XAGE1D,XA      | 58.00%   | 31.97% |
| PDZK1P2,PDZK1,PDZK1P1        | 39.03%   | 31.97% |
| CLIC1,CLIC1,CLIC1,CLIC1,CLIC | 25.62%   | 31.92% |
| MAX                          | 77.22%   | 31.91% |
| VPS29                        | 103.63%  | 31.90% |
| GRIFIN                       | 85.53%   | 31.89% |
| NDUFS2                       | 15.81%   | 31.87% |
| C12orf67                     | 140.39%  | 31.84% |
| DHRS9                        | 1718.31% | 31.84% |
| UCP2                         | 92.51%   | 31.81% |
| CREB3L4                      | 12.21%   | 31.80% |
| TINF2                        | 27.89%   | 31.79% |
| ZNF41                        | 96.35%   | 31.79% |
| MLL5                         | 404.72%  | 31.78% |
| C20orf91                     | 11.93%   | 31.74% |
| RASD2                        | 62.05%   | 31.73% |
| IL17B                        | 23.51%   | 31.72% |
| RIOK3                        | 75.29%   | 31.72% |
| RP11-568G11.3                | 487.23%  | 31.70% |
| BLMH                         | 23.13%   | 31.70% |
| XPNPEP1                      | 22.54%   | 31.69% |
| ST6GAL1                      | 93.19%   | 31.68% |
| GFRA4                        | 32.56%   | 31.68% |
| IRG1                         | 45.09%   | 31.67% |
| SGK1                         | 769.90%  | 31.67% |
| IDH1                         | 195.08%  | 31.65% |
| CYP2R1                       | 18.87%   | 31.63% |
| BRP44L                       | 63.29%   | 31.62% |
| SNX27                        | 14.15%   | 31.61% |
| PEX13                        | 446.46%  | 31.61% |
| PPARGC1B                     | 18.39%   | 31.59% |
| CAMK1                        | 15.02%   | 31.58% |
| CALR3,SLC35E1                | 16.64%   | 31.56% |
| UBC                          | 10.39%   | 31.54% |
| AC016747.7,KIAA1841          | 69.18%   | 31.53% |
| NEK9                         | 46.02%   | 31.52% |
| AC010300.8,ZNF91,AC02456:    | 206.56%  | 31.51% |

|                                  |         |        |
|----------------------------------|---------|--------|
| AC012100.1                       | 113.39% | 31.51% |
| GOLGA8B                          | 89.91%  | 31.50% |
| DUS4L                            | 16.12%  | 31.48% |
| C6orf168                         | 97.26%  | 31.48% |
| IL1F5                            | 92.11%  | 31.47% |
| RPA1                             | 65.09%  | 31.46% |
| APH1B                            | 25.55%  | 31.46% |
| CHRNE                            | 97.35%  | 31.45% |
| ZNF789                           | 96.35%  | 31.43% |
| CASZ1                            | 10.16%  | 31.42% |
| ZNF776                           | 48.74%  | 31.41% |
| DNM3                             | 42.73%  | 31.40% |
| CRYL1                            | 78.69%  | 31.40% |
| GTF2H1,AC090771.4-1,AC090771.4-2 | 35.23%  | 31.38% |
| CYP2B6                           | 65.85%  | 31.36% |
| ST5                              | 23.98%  | 31.35% |
| SERINC5                          | 190.68% | 31.34% |
| RP11-513I15.5                    | 48.12%  | 31.32% |
| JAGN1                            | 200.86% | 31.32% |
| PMF1                             | 14.13%  | 31.32% |
| CCRL2                            | 171.82% | 31.30% |
| RAB21                            | 33.56%  | 31.28% |
| C12orf42                         | 34.87%  | 31.26% |
| USP46                            | 98.66%  | 31.26% |
| FNBP1                            | 372.48% | 31.25% |
| SIGLEC14                         | 34.13%  | 31.24% |
| C8orf31                          | 35.84%  | 31.23% |
| MAFA                             | 31.22%  | 31.21% |
| TMEM161A                         | 33.21%  | 31.20% |
| CLEC18A                          | 22.75%  | 31.19% |
| SEMA3C                           | 161.34% | 31.19% |
| AC073869.1,RAB6A,RAB6C           | 214.44% | 31.19% |
| MRPL51                           | 161.75% | 31.19% |
| PEX6                             | 98.71%  | 31.17% |
| GNAI3                            | 97.55%  | 31.17% |
| HERC1                            | 37.03%  | 31.14% |
| HYDIN                            | 66.22%  | 31.10% |
| NEDD9                            | 384.82% | 31.09% |
| GLG1                             | 61.09%  | 31.09% |
| APEX2                            | 158.08% | 31.06% |
| SLC6A18                          | 64.49%  | 31.06% |
| RBM26                            | 238.29% | 31.05% |
| C3orf62                          | 41.37%  | 31.04% |
| TNRC6B                           | 21.65%  | 31.02% |
| SMCY                             | 38.54%  | 31.01% |
| RP11-314P12.3,ANXA8L1            | 49.28%  | 31.00% |
| CDC91L1                          | 44.71%  | 31.00% |

|                          |         |        |
|--------------------------|---------|--------|
| UNC45A                   | 43.07%  | 30.99% |
| FPR3                     | 181.40% | 30.99% |
| CDK5R1                   | 86.95%  | 30.97% |
| PPFIA1                   | 240.00% | 30.97% |
| C4orf34                  | 371.06% | 30.95% |
| DOCK2                    | 16.15%  | 30.93% |
| PTPRJ                    | 65.32%  | 30.93% |
| TLL6                     | 73.12%  | 30.92% |
| CSTB                     | 21.05%  | 30.92% |
| KIAA0430                 | 117.21% | 30.92% |
| RAD51L1                  | 92.07%  | 30.91% |
| FZD10                    | 71.34%  | 30.85% |
| TBC1D1                   | 17.55%  | 30.81% |
| AC023161.24-2            | 104.73% | 30.80% |
| OSGIN1,AC040169.7-1      | 120.82% | 30.79% |
| DNASE1L1                 | 58.53%  | 30.76% |
| MYL12B,MYL12A            | 266.30% | 30.75% |
| UFD1L                    | 147.85% | 30.72% |
| CRSP3                    | 496.26% | 30.72% |
| OASL                     | 30.32%  | 30.71% |
| DHX9                     | 16.10%  | 30.69% |
| KRTAP6-3                 | 55.04%  | 30.65% |
| PGRMC1                   | 190.75% | 30.64% |
| EFNB3                    | 10.36%  | 30.63% |
| PTPLA                    | 255.23% | 30.62% |
| MGAT4B                   | 29.48%  | 30.57% |
| GPC2                     | 26.75%  | 30.56% |
| INA                      | 23.68%  | 30.53% |
| BAZ1B                    | 87.10%  | 30.52% |
| HIST1H4C                 | 12.50%  | 30.52% |
| CPD                      | 142.28% | 30.50% |
| SEC61A2                  | 22.77%  | 30.50% |
| RP11-490D19.6            | 111.03% | 30.49% |
| HIPK1                    | 128.41% | 30.49% |
| KRAS                     | 64.01%  | 30.49% |
| ARPC5                    | 271.32% | 30.49% |
| FOXO1A                   | 91.32%  | 30.48% |
| SLAMF1                   | 65.31%  | 30.45% |
| ASAH1                    | 81.27%  | 30.45% |
| MOGAT3                   | 38.02%  | 30.42% |
| RHEB,FAM35B2,RP11-575L16 | 181.81% | 30.41% |
| ZNF697                   | 102.17% | 30.41% |
| EXOC4                    | 108.50% | 30.39% |
| ARHGEF3                  | 197.46% | 30.39% |
| RP11-554F20.1            | 43.59%  | 30.36% |
| HABP4                    | 67.27%  | 30.32% |
| IL2RA                    | 53.58%  | 30.32% |

|                          |         |        |
|--------------------------|---------|--------|
| SRGN                     | 109.98% | 30.31% |
| ROR2                     | 38.50%  | 30.27% |
| OPN5                     | 210.71% | 30.27% |
| GFER                     | 38.46%  | 30.27% |
| HP,AC009087.4-2          | 17.83%  | 30.26% |
| DLEU1                    | 75.75%  | 30.25% |
| BIK                      | 40.46%  | 30.22% |
| PADI1                    | 53.84%  | 30.22% |
| AC016907.3               | 56.43%  | 30.22% |
| PPM1H                    | 70.54%  | 30.21% |
| ACSM1                    | 13.75%  | 30.18% |
| RAP2A                    | 47.42%  | 30.17% |
| CTNND2                   | 13.59%  | 30.14% |
| CA6                      | 53.50%  | 30.14% |
| NMI                      | 35.82%  | 30.05% |
| PMPCB                    | 74.65%  | 30.04% |
| CHRFAM7A,CHRNA7          | 56.99%  | 30.04% |
| FBRSL1                   | 46.94%  | 30.03% |
| DUSP22,AL357054.14       | 71.71%  | 30.01% |
| CDCA3                    | 83.10%  | 30.00% |
| MAGEB4                   | 90.84%  | 30.00% |
| RP1-66N13.3              | 76.26%  | 29.99% |
| WNT10A                   | 17.91%  | 29.98% |
| ITGB1                    | 46.28%  | 29.98% |
| SULF1                    | 20.87%  | 29.97% |
| AC136632.3-2             | 10.30%  | 29.94% |
| NDUFS4                   | 82.98%  | 29.94% |
| ZER1                     | 30.26%  | 29.93% |
| DCTN4                    | 76.19%  | 29.92% |
| EFTUD2                   | 30.32%  | 29.92% |
| KPNA3                    | 64.85%  | 29.91% |
| ZNF304                   | 194.87% | 29.91% |
| NCALD,PLEKHG1,RP1-44A20. | 67.00%  | 29.90% |
| RP11-389K14.3            | 220.65% | 29.90% |
| FNBP1L                   | 463.82% | 29.90% |
| UTP14A                   | 23.09%  | 29.89% |
| MED17                    | 22.39%  | 29.88% |
| FBP1                     | 25.32%  | 29.85% |
| CISD1                    | 321.54% | 29.82% |
| RPL3L                    | 45.45%  | 29.82% |
| CALML3                   | 27.07%  | 29.78% |
| STT3B                    | 274.64% | 29.77% |
| DNAJC9,RP5-1099D15.1     | 145.66% | 29.76% |
| EVI5L                    | 39.74%  | 29.75% |
| SNUPN                    | 30.58%  | 29.75% |
| THSD4                    | 21.01%  | 29.73% |
| SPRED3                   | 20.52%  | 29.73% |



|                     |         |        |
|---------------------|---------|--------|
| COX6B1              | 39.27%  | 29.72% |
| CACNA1F             | 40.00%  | 29.69% |
| SNX3                | 266.39% | 29.69% |
| SMC2                | 120.55% | 29.69% |
| MRPL33              | 92.67%  | 29.66% |
| CAMK1D              | 24.47%  | 29.66% |
| PYGM                | 34.11%  | 29.62% |
| COQ10B              | 35.76%  | 29.61% |
| MEX3C               | 691.43% | 29.60% |
| SECTM1              | 25.27%  | 29.57% |
| MPHOSPH6            | 87.62%  | 29.57% |
| ARHGEF10            | 18.44%  | 29.56% |
| CST7                | 168.40% | 29.53% |
| H2AFX               | 66.84%  | 29.52% |
| AC005077.11         | 23.74%  | 29.51% |
| RIPPLY1             | 16.62%  | 29.48% |
| ISOC2               | 35.34%  | 29.44% |
| C14orf28            | 19.66%  | 29.41% |
| PHLDB3              | 40.72%  | 29.40% |
| PHKB                | 123.90% | 29.39% |
| TJP2                | 106.20% | 29.39% |
| C12orf41            | 24.61%  | 29.31% |
| CLC                 | 80.17%  | 29.29% |
| DNAJC14             | 47.72%  | 29.27% |
| DNAH2               | 71.62%  | 29.27% |
| PSMB4               | 27.02%  | 29.24% |
| MALAT1              | 242.61% | 29.23% |
| THEM4               | 49.88%  | 29.23% |
| MAP2                | 14.60%  | 29.15% |
| TTC15               | 11.00%  | 29.15% |
| SEPT3               | 71.11%  | 29.14% |
| IMPDH2              | 22.91%  | 29.14% |
| UPF2                | 62.19%  | 29.14% |
| IGSF11              | 10.32%  | 29.11% |
| TSSK6               | 60.50%  | 29.10% |
| GNPDA1              | 81.46%  | 29.10% |
| C1orf143            | 177.35% | 29.08% |
| OXCT1               | 201.64% | 29.07% |
| RP11-107I14.1       | 36.33%  | 29.07% |
| XDH                 | 62.36%  | 29.07% |
| ACSL1               | 482.40% | 29.06% |
| ACADSB              | 27.10%  | 29.06% |
| C20orf144,C20orf134 | 66.44%  | 29.04% |
| AC104592.2          | 25.95%  | 29.02% |
| CRMP1               | 12.91%  | 29.01% |
| C1orf97             | 161.89% | 28.98% |
| QRFP                | 38.93%  | 28.98% |

|                                  |         |        |
|----------------------------------|---------|--------|
| PPFIA3                           | 10.94%  | 28.98% |
| AL031846.2,ASCC2,ASCC2           | 14.10%  | 28.97% |
| ACHE                             | 48.02%  | 28.95% |
| ETV1                             | 19.69%  | 28.95% |
| EIF5B                            | 60.67%  | 28.94% |
| PLEKHG1,RP1-44A20.4,PDCL3        | 75.18%  | 28.90% |
| ZFAND2A                          | 36.18%  | 28.88% |
| TLE1                             | 12.74%  | 28.86% |
| CNFN                             | 65.94%  | 28.86% |
| NCOA5                            | 36.18%  | 28.86% |
| CKMT1A,CKMT1A,CKMT1B             | 36.32%  | 28.84% |
| DENND1C                          | 111.57% | 28.83% |
| RAB30                            | 78.59%  | 28.83% |
| RP11-342C20.3                    | 120.91% | 28.82% |
| GDAP2                            | 74.71%  | 28.82% |
| GLIS1                            | 135.14% | 28.81% |
| CCR5                             | 15.35%  | 28.80% |
| AC021937.1,EXT1                  | 678.79% | 28.79% |
| DIRC2                            | 144.57% | 28.79% |
| ELOVL1                           | 24.82%  | 28.79% |
| HLA-DRA,HLA-DRA,HLA-DRA,<br>NANS | 62.96%  | 28.76% |
| PRMT10                           | 903.57% | 28.71% |
| EPS8L3                           | 35.80%  | 28.69% |
| ACPL2                            | 73.45%  | 28.68% |
| AP000769.5-1                     | 10.92%  | 28.67% |
| CPNE1                            | 106.15% | 28.66% |
| RCN3                             | 31.56%  | 28.65% |
| PADI3                            | 29.91%  | 28.65% |
| DNAJB12                          | 10.97%  | 28.61% |
| TMEM126B                         | 210.37% | 28.61% |
| OR2H1,OR2H1,OR2H1,OR2H1          | 300.72% | 28.57% |
| LSM6                             | 19.49%  | 28.57% |
| CALM1                            | 144.77% | 28.57% |
| C17orf95                         | 184.34% | 28.53% |
| RAPGEF3                          | 32.79%  | 28.51% |
| TNRC6C                           | 16.02%  | 28.50% |
| SNORA24                          | 129.77% | 28.49% |
| LPP                              | 41.62%  | 28.49% |
| MEGF9                            | 70.26%  | 28.47% |
| GPR19                            | 114.22% | 28.43% |
| KIAA1772                         | 103.45% | 28.41% |
| NMT1                             | 19.91%  | 28.39% |
| RP13-143G15.3                    | 78.91%  | 28.39% |
| RP1-212P9.2                      | 10.04%  | 28.37% |
| ZNF580                           | 94.53%  | 28.35% |
| MYADM                            | 163.84% | 28.34% |

|                           |         |        |
|---------------------------|---------|--------|
| C2orf56                   | 49.36%  | 28.29% |
| ONECUT2                   | 77.99%  | 28.29% |
| GOLGA4                    | 12.27%  | 28.29% |
| JUND                      | 102.43% | 28.27% |
| ETV4                      | 16.32%  | 28.26% |
| AC010441.6                | 49.15%  | 28.25% |
| CASK,YWHAZ,RP11-45P22.1,I | 218.03% | 28.25% |
| TMEM41A                   | 211.90% | 28.24% |
| NOL11                     | 142.86% | 28.24% |
| JAM2                      | 74.73%  | 28.23% |
| HSPE1,UBE2D2,CRTC3,CDH3,  | 88.34%  | 28.21% |
| IKBKAP                    | 55.02%  | 28.20% |
| PPP5C                     | 29.53%  | 28.20% |
| ZCCHC11                   | 46.20%  | 28.15% |
| AC083841.9,C8orf55        | 20.70%  | 28.15% |
| CASP9                     | 299.70% | 28.14% |
| PMCHL1,PMCHL2             | 94.82%  | 28.14% |
| NMI                       | 257.39% | 28.14% |
| POLR3GL                   | 45.05%  | 28.14% |
| RP11-690C23.2             | 24.50%  | 28.11% |
| SERBP1                    | 53.62%  | 28.11% |
| TRIM38                    | 15.45%  | 28.11% |
| MRPS5                     | 61.61%  | 28.10% |
| PPM1K                     | 90.17%  | 28.09% |
| NFAT5                     | 743.35% | 28.09% |
| TNR                       | 17.36%  | 28.09% |
| SHB                       | 24.19%  | 28.08% |
| RARA                      | 46.39%  | 28.08% |
| EPHA10                    | 55.69%  | 28.08% |
| ATP7B                     | 54.89%  | 28.07% |
| C19orf57                  | 60.70%  | 28.07% |
| C17orf72                  | 44.36%  | 28.06% |
| TANK                      | 470.16% | 28.05% |
| CNTN4                     | 27.45%  | 28.05% |
| RP13-150K15.1,TRMT1       | 58.50%  | 28.04% |
| LCE1C,LCE2B,LCE1F         | 35.11%  | 28.03% |
| PGAM5                     | 61.61%  | 28.02% |
| FAM167B                   | 23.69%  | 28.00% |
| PIGC                      | 112.84% | 27.99% |
| RP4-662A9.2               | 12.55%  | 27.97% |
| NEDD8                     | 50.12%  | 27.96% |
| BZW1,BZW1L1               | 670.00% | 27.94% |
| TAOK2                     | 13.83%  | 27.94% |
| C20orf71                  | 57.40%  | 27.92% |
| ITFG1                     | 561.54% | 27.91% |
| CA3                       | 129.44% | 27.90% |
| A4GNT                     | 19.32%  | 27.89% |

|                          |          |        |
|--------------------------|----------|--------|
| RMND1                    | 42.93%   | 27.88% |
| AC092296.2-1             | 48.21%   | 27.87% |
| HERPUD2                  | 18.34%   | 27.85% |
| DENND4B                  | 22.33%   | 27.84% |
| SLC4A1                   | 27.49%   | 27.83% |
| SLC38A2                  | 90.10%   | 27.81% |
| NDEL1                    | 256.53%  | 27.80% |
| EGR1                     | 47.75%   | 27.78% |
| C16orf3                  | 17.13%   | 27.78% |
| FAM46A                   | 322.12%  | 27.77% |
| SOX7                     | 84.84%   | 27.76% |
| PKMYT1                   | 80.85%   | 27.75% |
| CEBPA                    | 16.81%   | 27.72% |
| ZNF320,ZNF28,ZNF816A     | 52.66%   | 27.72% |
| HEXIM1                   | 224.24%  | 27.70% |
| COX5B                    | 19.74%   | 27.70% |
| GZMB                     | 1121.92% | 27.69% |
| IL6                      | 329.22%  | 27.69% |
| SLC27A1                  | 108.68%  | 27.66% |
| CBX3                     | 20.09%   | 27.65% |
| CHGB                     | 178.02%  | 27.63% |
| ATP1A4                   | 51.41%   | 27.61% |
| SEC61B                   | 14.81%   | 27.61% |
| SEPN1                    | 20.10%   | 27.61% |
| SLC25A21                 | 52.10%   | 27.60% |
| TIMP2                    | 327.26%  | 27.60% |
| PPAP2A                   | 72.01%   | 27.59% |
| FBXO11                   | 351.73%  | 27.58% |
| RP11-216L13.14,LCN8      | 13.74%   | 27.53% |
| SSR2                     | 38.41%   | 27.51% |
| RP11-556K13.1,AC139769.1 | 148.12%  | 27.51% |
| FAM131C,RP11-5P18.10     | 44.58%   | 27.50% |
| AL611925.27-1            | 113.88%  | 27.48% |
| MBOAT2                   | 36.90%   | 27.46% |
| C17orf65                 | 48.03%   | 27.45% |
| CHKA                     | 31.18%   | 27.44% |
| HBXIP                    | 81.81%   | 27.43% |
| CMAS                     | 68.63%   | 27.41% |
| PBX1                     | 100.29%  | 27.40% |
| AMTN                     | 21.25%   | 27.39% |
| SHBG                     | 37.12%   | 27.39% |
| GOLT1B                   | 228.86%  | 27.38% |
| C7orf42                  | 76.01%   | 27.36% |
| EPHB4                    | 30.18%   | 27.36% |
| GOLGA7                   | 46.69%   | 27.35% |
| CCDC109B,CCDC13,AC07357: | 511.05%  | 27.35% |
| CLCN3                    | 313.38%  | 27.34% |

|                           |         |        |
|---------------------------|---------|--------|
| COL6A3                    | 41.04%  | 27.33% |
| RP5-1109J22.1             | 49.94%  | 27.32% |
| CLK1                      | 769.52% | 27.31% |
| PELI2                     | 357.77% | 27.31% |
| ASH2L                     | 21.48%  | 27.28% |
| ERCC6                     | 129.30% | 27.27% |
| ALG8                      | 239.25% | 27.27% |
| ARL5A,RP3-481A17.1        | 961.70% | 27.25% |
| ACTL7A                    | 28.25%  | 27.25% |
| PLEC1                     | 24.56%  | 27.23% |
| C15orf15,TTC37,RP11-746P2 | 48.74%  | 27.23% |
| TMEM126A                  | 375.89% | 27.23% |
| C4orf3                    | 122.57% | 27.22% |
| STXBP5                    | 101.01% | 27.21% |
| NR3C1                     | 211.70% | 27.20% |
| HIST1H4C                  | 18.47%  | 27.20% |
| CTPS2                     | 125.97% | 27.19% |
| C8orf40                   | 163.23% | 27.19% |
| AC010536.8-2              | 34.93%  | 27.19% |
| C17orf87                  | 118.62% | 27.17% |
| GUCY2F                    | 28.90%  | 27.16% |
| RRN3                      | 38.30%  | 27.15% |
| LELP1                     | 38.03%  | 27.13% |
| EPHA6                     | 76.79%  | 27.13% |
| NR2C2                     | 18.44%  | 27.13% |
| IL18R1,IL1RL1             | 660.52% | 27.12% |
| GUCY1A3                   | 92.42%  | 27.12% |
| C12orf52                  | 36.53%  | 27.11% |
| MFF                       | 115.35% | 27.09% |
| TRAPPC1                   | 79.33%  | 27.08% |
| CASC4                     | 283.54% | 27.07% |
| SNX25                     | 81.79%  | 27.04% |
| RPGRIP1L                  | 67.99%  | 27.02% |
| IMPAD1                    | 173.20% | 27.00% |
| NSUN2                     | 33.50%  | 26.97% |
| ORMDL2                    | 38.13%  | 26.97% |
| GPHA2                     | 40.53%  | 26.97% |
| PIP5K3                    | 777.98% | 26.96% |
| RP11-165H4.2              | 41.10%  | 26.95% |
| IGSF1                     | 39.66%  | 26.93% |
| AC012607.8                | 28.67%  | 26.92% |
| SOCS6                     | 134.80% | 26.91% |
| IARS2                     | 502.11% | 26.90% |
| CECR6                     | 25.49%  | 26.84% |
| TBC1D2B                   | 112.23% | 26.81% |
| AC007551.3                | 14.89%  | 26.80% |
| MRPL15                    | 120.97% | 26.78% |

|                           |         |        |
|---------------------------|---------|--------|
| DSTYK                     | 114.93% | 26.76% |
| ZNF497                    | 33.48%  | 26.74% |
| AL121761.5-1              | 35.36%  | 26.74% |
| F5                        | 191.11% | 26.72% |
| ZNF706                    | 177.84% | 26.72% |
| OLFM1                     | 43.32%  | 26.71% |
| LDB1                      | 20.08%  | 26.71% |
| ABLIM2                    | 24.55%  | 26.67% |
| SLC8A2                    | 27.01%  | 26.66% |
| SLC17A9                   | 87.58%  | 26.65% |
| MGST3                     | 286.13% | 26.65% |
| TFB1M                     | 80.87%  | 26.64% |
| ABTB1                     | 14.31%  | 26.62% |
| RAB18                     | 58.80%  | 26.60% |
| RP11-335G20.1,RP3-469D22. | 64.77%  | 26.59% |
| MFSD2                     | 74.09%  | 26.57% |
| LYPLAL1                   | 624.76% | 26.54% |
| LRRC1                     | 135.80% | 26.54% |
| YWHAQ                     | 172.51% | 26.53% |
| TAS2R13                   | 151.30% | 26.53% |
| ADORA3                    | 51.68%  | 26.51% |
| CRK                       | 135.46% | 26.51% |
| SETD1B                    | 10.04%  | 26.50% |
| IGF2R                     | 10.86%  | 26.46% |
| DSCR1                     | 329.17% | 26.46% |
| CHFR                      | 102.65% | 26.46% |
| EHD4                      | 105.01% | 26.43% |
| SEMA6B                    | 13.67%  | 26.42% |
| TPK1                      | 277.60% | 26.40% |
| CEP78                     | 120.96% | 26.39% |
| NR0B2                     | 64.13%  | 26.36% |
| SLC4A2                    | 31.63%  | 26.35% |
| LIPA                      | 68.91%  | 26.34% |
| DMRT1                     | 74.43%  | 26.32% |
| AC132186.3-1              | 84.27%  | 26.31% |
| FHL2                      | 69.31%  | 26.27% |
| ETFA                      | 382.08% | 26.27% |
| DSTN                      | 130.70% | 26.26% |
| AC104212.3-1,RPS5,RP11-34 | 110.92% | 26.25% |
| SERP1                     | 416.30% | 26.24% |
| C15orf27                  | 11.64%  | 26.24% |
| FBXO3                     | 148.25% | 26.15% |
| NRF1                      | 61.56%  | 26.13% |
| C19orf36                  | 15.92%  | 26.12% |
| MUC4                      | 23.50%  | 26.12% |
| PID1                      | 71.21%  | 26.12% |
| DSCR9                     | 92.86%  | 26.09% |

|                         |         |        |
|-------------------------|---------|--------|
| FAM32B,FAM32A           | 39.86%  | 26.09% |
| AC017019.5,TTY2         | 27.41%  | 26.07% |
| GLUD1,GLUD2             | 208.14% | 26.05% |
| HARS2                   | 51.07%  | 26.05% |
| TRIM58                  | 38.19%  | 26.04% |
| ZNF830                  | 110.39% | 26.04% |
| DAZAP2                  | 120.95% | 26.03% |
| TMEM22                  | 406.31% | 26.02% |
| CRTC3                   | 36.62%  | 26.02% |
| RP5-882O7.5,GBAS,ZNF713 | 30.26%  | 25.97% |
| OSGEP                   | 109.86% | 25.97% |
| ATP11B                  | 245.84% | 25.96% |
| C9orf25                 | 48.67%  | 25.95% |
| RP11-307E17.2,VDAC1     | 210.35% | 25.93% |
| GPR110                  | 51.33%  | 25.90% |
| CCDC136                 | 10.76%  | 25.90% |
| RP5-1182A14.3,MSTP9     | 61.75%  | 25.89% |
| KRT38                   | 30.48%  | 25.89% |
| NAGA                    | 64.17%  | 25.89% |
| OR2AE1                  | 27.64%  | 25.88% |
| EIF4E                   | 210.95% | 25.85% |
| CD1B                    | 37.60%  | 25.84% |
| MALAT1                  | 217.75% | 25.83% |
| NLGN4Y                  | 125.23% | 25.80% |
| TUBB2A                  | 281.10% | 25.74% |
| RP11-191L9.4            | 29.43%  | 25.72% |
| C5orf36                 | 74.34%  | 25.72% |
| AC116353.7              | 20.07%  | 25.68% |
| UBXN8                   | 321.70% | 25.65% |
| FCHSD2                  | 89.17%  | 25.64% |
| MAPRE1                  | 90.09%  | 25.62% |
| ATP6V0D1                | 36.59%  | 25.62% |
| RRAGA                   | 58.31%  | 25.59% |
| FOXF1                   | 249.95% | 25.59% |
| GPR62                   | 22.30%  | 25.58% |
| AC020915.4              | 213.71% | 25.56% |
| NRL                     | 25.83%  | 25.54% |
| PSMB9                   | 90.62%  | 25.54% |
| MAP4K4                  | 217.18% | 25.53% |
| FBLIM1                  | 27.89%  | 25.53% |
| NCAPD2                  | 75.82%  | 25.51% |
| SMARCD1                 | 34.22%  | 25.50% |
| RP11-31E13.1            | 127.39% | 25.47% |
| ELOVL4                  | 59.13%  | 25.46% |
| KIT                     | 53.79%  | 25.45% |
| KRTAP3-3                | 34.80%  | 25.42% |
| HPN                     | 23.07%  | 25.42% |

|                           |         |        |
|---------------------------|---------|--------|
| C1orf175                  | 38.15%  | 25.39% |
| DOPEY1                    | 178.45% | 25.39% |
| GNE                       | 41.38%  | 25.38% |
| NDUFAB1                   | 132.67% | 25.34% |
| TPM2                      | 19.92%  | 25.33% |
| SSR3                      | 56.09%  | 25.30% |
| HGD                       | 31.93%  | 25.29% |
| CASK                      | 55.61%  | 25.29% |
| PRKCB                     | 79.03%  | 25.25% |
| SNAI1                     | 33.56%  | 25.25% |
| STAU2                     | 59.29%  | 25.25% |
| RP11-54D18.1,LDHA         | 63.41%  | 25.23% |
| SRXN1,AL121758.24-1       | 262.85% | 25.22% |
| DUSP2                     | 129.29% | 25.21% |
| CSTF3                     | 14.82%  | 25.21% |
| IL1RN                     | 48.80%  | 25.20% |
| CRKL                      | 149.56% | 25.20% |
| MLANA                     | 22.06%  | 25.18% |
| AC025449.6-2,OFD1         | 46.59%  | 25.18% |
| UGT2B17,AC147055.2        | 518.26% | 25.18% |
| CLSPN                     | 15.99%  | 25.15% |
| RUNDC1                    | 40.21%  | 25.15% |
| SLCO4A1                   | 115.96% | 25.13% |
| DLC1                      | 234.76% | 25.13% |
| NRXN2                     | 25.20%  | 25.12% |
| HSD17B4                   | 98.48%  | 25.11% |
| NGLY1                     | 308.94% | 25.10% |
| TXNDC6                    | 92.92%  | 25.10% |
| CADM1                     | 265.64% | 25.08% |
| CSDC2                     | 35.01%  | 25.04% |
| NEU4                      | 718.69% | 25.00% |
| L3MBTL4                   | 53.93%  | 25.00% |
| SLC6A9                    | 30.51%  | 25.00% |
| ADAMTS14                  | 53.68%  | 24.98% |
| CAPZA1                    | 67.15%  | 24.98% |
| CPB1                      | 45.44%  | 24.97% |
| CCL5                      | 20.73%  | 24.97% |
| MRPS18C                   | 112.59% | 24.96% |
| PPM1A                     | 117.88% | 24.96% |
| RABEP1                    | 80.16%  | 24.90% |
| MDFIC                     | 37.40%  | 24.90% |
| CD7                       | 17.72%  | 24.88% |
| ZNF403                    | 32.29%  | 24.82% |
| TMEM109                   | 16.16%  | 24.82% |
| UBE2I                     | 45.52%  | 24.80% |
| C10orf104                 | 30.99%  | 24.78% |
| IGHV5-78,AB019438.1-3,ABO | 80.84%  | 24.77% |



|                             |           |        |
|-----------------------------|-----------|--------|
| ETS2                        | 55.37%    | 24.77% |
| CWF19L2                     | 58.81%    | 24.77% |
| LETM1                       | 25.95%    | 24.77% |
| AURKA                       | 30.68%    | 24.74% |
| CACNG5                      | 42.20%    | 24.74% |
| OR1J2                       | 64.87%    | 24.74% |
| C14orf162                   | 53.12%    | 24.73% |
| RP11-160H22.1               | 634.86%   | 24.73% |
| RNF122                      | 96.84%    | 24.72% |
| JRKL                        | 51.69%    | 24.70% |
| CCT2                        | 212.78%   | 24.69% |
| CHD9                        | 27.91%    | 24.69% |
| SPTY2D1                     | 297.33%   | 24.69% |
| ABI3BP                      | 14.18%    | 24.68% |
| PSME1                       | 10.54%    | 24.68% |
| PLEKHA1                     | 143.82%   | 24.67% |
| MOSC1                       | 48.54%    | 24.67% |
| LMTK3                       | 22.51%    | 24.67% |
| MAN2B2                      | 11.38%    | 24.66% |
| C14orf45                    | 518.95%   | 24.66% |
| CCL4L1,CCL4,CCL4L2          | 10035.90% | 24.64% |
| CCDC46                      | 92.01%    | 24.63% |
| C6orf25,C6orf25,C6orf25,C6c | 226.99%   | 24.58% |
| ARHGAP21,RP11-296E7.1       | 80.82%    | 24.54% |
| TAF1A                       | 55.64%    | 24.53% |
| MERTK                       | 55.67%    | 24.48% |
| TRIM50                      | 33.76%    | 24.46% |
| CPA3                        | 515.88%   | 24.45% |
| PTENP1,PTEN                 | 116.72%   | 24.44% |
| C20orf108                   | 63.90%    | 24.43% |
| NAT1                        | 245.93%   | 24.41% |
| GJB1                        | 63.65%    | 24.40% |
| HARS                        | 431.98%   | 24.40% |
| TRIM26,TRIM26,TRIM26,TRIM   | 59.18%    | 24.36% |
| ANKRD18B                    | 19.25%    | 24.35% |
| TNIK                        | 125.56%   | 24.34% |
| ST6GALNAC2                  | 51.39%    | 24.34% |
| SEZ6L2                      | 15.29%    | 24.33% |
| GSTA4                       | 104.04%   | 24.33% |
| RPL21P62                    | 51.95%    | 24.32% |
| HOXA7                       | 25.26%    | 24.30% |
| DSCR4                       | 124.69%   | 24.29% |
| SH3TC1                      | 16.81%    | 24.28% |
| MRPS28                      | 70.24%    | 24.26% |
| MSTO1,RP11-243J18.3         | 51.99%    | 24.23% |
| C9orf163                    | 54.95%    | 24.23% |
| GPR141                      | 272.90%   | 24.22% |

|                           |          |        |
|---------------------------|----------|--------|
| HNRPA2B1                  | 117.98%  | 24.22% |
| MEMO1,DPY30,AP000689.3    | 187.96%  | 24.18% |
| CCRL2                     | 22.29%   | 24.14% |
| ITGB6                     | 38.30%   | 24.14% |
| CAMSAP1L1                 | 32.44%   | 24.11% |
| AC018816.4                | 20.34%   | 24.02% |
| NT5C2                     | 93.85%   | 24.00% |
| CXCR6                     | 36.42%   | 23.98% |
| CD58,RP4-655J12.5         | 1264.36% | 23.95% |
| DNTTIP2                   | 133.64%  | 23.93% |
| POLR1B                    | 54.36%   | 23.92% |
| BFSP2                     | 20.25%   | 23.91% |
| OTUD7A                    | 31.80%   | 23.91% |
| AC105339.1                | 30.94%   | 23.88% |
| MYL2                      | 22.55%   | 23.86% |
| TNRC6B                    | 66.91%   | 23.85% |
| ZNF445                    | 13.72%   | 23.83% |
| CNOT4                     | 60.62%   | 23.82% |
| DENND4C                   | 13.39%   | 23.82% |
| MCEE                      | 98.22%   | 23.82% |
| POM121B,POM121,POM121     | 108.27%  | 23.81% |
| PARD6A                    | 49.12%   | 23.78% |
| CNOT2                     | 235.68%  | 23.77% |
| CD83                      | 672.89%  | 23.73% |
| RP11-744H18.2,NBPF6,AL45C | 116.79%  | 23.72% |
| POLR2K                    | 189.47%  | 23.69% |
| HTR3C                     | 81.92%   | 23.68% |
| ANKRD32                   | 91.57%   | 23.68% |
| H2AFV                     | 75.72%   | 23.66% |
| ZNF398                    | 26.19%   | 23.65% |
| HUNK                      | 15.14%   | 23.63% |
| APOBEC3B,APOBEC3F         | 24.67%   | 23.63% |
| SLC38A10                  | 41.55%   | 23.61% |
| PQLC1                     | 18.78%   | 23.61% |
| RNF7                      | 52.84%   | 23.57% |
| CDC73                     | 92.84%   | 23.55% |
| FDFT1                     | 12.57%   | 23.54% |
| PSMD7                     | 112.27%  | 23.50% |
| PIK3R2                    | 53.07%   | 23.49% |
| RP1-43E13.2               | 283.39%  | 23.46% |
| UBE2C                     | 27.93%   | 23.45% |
| NMNAT1                    | 174.74%  | 23.45% |
| DMRTC1,CXorf50,CXorf50    | 22.77%   | 23.43% |
| KRT10                     | 23.35%   | 23.42% |
| BRPF3                     | 60.43%   | 23.39% |
| TMEM47                    | 168.87%  | 23.39% |
| ASCC3,AC019080.1,RP11-637 | 28.45%   | 23.38% |

|                     |         |        |
|---------------------|---------|--------|
| RLF                 | 71.21%  | 23.37% |
| UNC5CL              | 15.15%  | 23.33% |
| ZNF678              | 47.09%  | 23.32% |
| AIRE                | 16.72%  | 23.31% |
| FMO1                | 18.48%  | 23.31% |
| SLC10A7             | 54.86%  | 23.30% |
| IGSF8               | 50.29%  | 23.27% |
| ATF1                | 36.81%  | 23.26% |
| QPCT                | 164.43% | 23.25% |
| KIAA1618            | 17.85%  | 23.24% |
| PAF1                | 19.86%  | 23.23% |
| FANCE               | 43.30%  | 23.20% |
| RP11-23J9.3         | 27.05%  | 23.19% |
| TRBC1,TRBC2         | 35.61%  | 23.18% |
| TGM2                | 33.33%  | 23.18% |
| GPR15               | 35.30%  | 23.15% |
| SNORA25,SNORA25     | 50.65%  | 23.13% |
| DEFB126             | 34.24%  | 23.10% |
| ANKRD39,ANKRD23     | 61.60%  | 23.10% |
| C6orf163            | 18.99%  | 23.09% |
| GSTO1,AC097105.10-1 | 82.53%  | 23.08% |
| AKAP11              | 365.44% | 23.06% |
| LRRN4CL             | 23.02%  | 23.06% |
| TMEM9B              | 139.58% | 23.06% |
| AC132812.9,KPNA2    | 93.83%  | 23.04% |
| DYRK1A              | 145.26% | 23.03% |
| CLEC4F              | 49.12%  | 23.01% |
| NAV2                | 59.25%  | 23.00% |
| IL18R1              | 323.62% | 22.99% |
| FBLL1               | 14.97%  | 22.98% |
| ANKRD46             | 23.47%  | 22.97% |
| LHFP                | 56.51%  | 22.96% |
| CPA2                | 28.30%  | 22.95% |
| TMEM106B            | 135.09% | 22.94% |
| MPEG1               | 99.17%  | 22.91% |
| PXN                 | 29.11%  | 22.89% |
| PHF6                | 48.46%  | 22.88% |
| LILRA2,LILRB2       | 35.11%  | 22.87% |
| TAAR5               | 34.59%  | 22.86% |
| SH3BP2              | 76.90%  | 22.86% |
| LPIN1               | 247.75% | 22.85% |
| TCERG1              | 282.63% | 22.83% |
| NEU4                | 362.73% | 22.82% |
| VAMP8               | 85.53%  | 22.81% |
| ARRB1               | 38.30%  | 22.80% |
| CGGBP1              | 173.18% | 22.79% |
| LYAR                | 274.09% | 22.78% |

|                           |         |        |
|---------------------------|---------|--------|
| CD300C                    | 107.77% | 22.76% |
| EIF4A3                    | 65.23%  | 22.76% |
| MRRFP,MRRF                | 88.68%  | 22.74% |
| RAB38                     | 111.01% | 22.72% |
| GNA15                     | 10.27%  | 22.71% |
| GNAS,GNAS,AL136532.22     | 246.61% | 22.70% |
| PRKAR1B                   | 20.59%  | 22.68% |
| RHOV                      | 22.10%  | 22.67% |
| SLC18A2                   | 198.45% | 22.66% |
| LHFPL2                    | 22.37%  | 22.65% |
| AL139023.6,BNIP3          | 63.31%  | 22.64% |
| PPWD1                     | 91.67%  | 22.64% |
| AP001157.4-1,C1QBP        | 72.09%  | 22.62% |
| C4orf18                   | 64.69%  | 22.58% |
| ANKRD27                   | 21.29%  | 22.57% |
| BLOC1S2                   | 27.62%  | 22.56% |
| LCMT1                     | 110.07% | 22.56% |
| AC124944.3                | 57.63%  | 22.55% |
| LAMB1                     | 93.46%  | 22.54% |
| C21orf74                  | 31.13%  | 22.54% |
| RBL1                      | 29.77%  | 22.54% |
| PTGES3                    | 75.40%  | 22.52% |
| OLFM2                     | 45.18%  | 22.51% |
| AC004597.1                | 93.38%  | 22.50% |
| NCKIPSD                   | 20.34%  | 22.50% |
| MAPT                      | 130.35% | 22.47% |
| AP3B2                     | 82.18%  | 22.46% |
| TPRXL                     | 71.05%  | 22.44% |
| RSRC1                     | 243.09% | 22.44% |
| RRP12                     | 148.76% | 22.43% |
| C1orf162                  | 249.16% | 22.42% |
| UBE3C                     | 42.40%  | 22.42% |
| PPARA                     | 23.86%  | 22.38% |
| PRKAR1B                   | 66.87%  | 22.36% |
| CTF1                      | 72.10%  | 22.36% |
| SS18L2                    | 41.33%  | 22.35% |
| DLG3                      | 32.05%  | 22.26% |
| CD58,RP4-655J12.5         | 143.49% | 22.24% |
| TNS1                      | 13.58%  | 22.24% |
| EIF4A2                    | 105.46% | 22.23% |
| FAM104B                   | 32.79%  | 22.23% |
| AC087393.1                | 49.35%  | 22.22% |
| KCTD10                    | 35.52%  | 22.22% |
| HNRPLL                    | 486.27% | 22.19% |
| SLC35C1                   | 15.35%  | 22.17% |
| PHC1B,PHC1                | 136.05% | 22.17% |
| PNRC2,AL390877.1,BX51101: | 323.58% | 22.16% |

|                           |           |        |
|---------------------------|-----------|--------|
| SRA1                      | 82.55%    | 22.15% |
| CFI                       | 92.11%    | 22.15% |
| SSBP1                     | 62.47%    | 22.14% |
| ANP32A                    | 37.88%    | 22.14% |
| ASTL                      | 12.14%    | 22.13% |
| CACNG6                    | 37.76%    | 22.13% |
| RPL30,AC138972.1          | 73.31%    | 22.11% |
| GNG2                      | 57800.00% | 22.11% |
| L1CAM                     | 19.78%    | 22.01% |
| COLEC11                   | 41.89%    | 22.01% |
| CST3                      | 10.00%    | 22.00% |
| PPA2                      | 129.18%   | 22.00% |
| MDH1                      | 86.69%    | 21.97% |
| RAD1                      | 90.98%    | 21.96% |
| TIMM17A                   | 151.73%   | 21.95% |
| C20orf12                  | 92.18%    | 21.95% |
| RP11-77G22.3,SDCBP        | 381.02%   | 21.94% |
| ZNF720                    | 10.30%    | 21.92% |
| UGCGL2                    | 92.09%    | 21.91% |
| ORMDL1                    | 111.87%   | 21.91% |
| TIGIT                     | 16.32%    | 21.90% |
| FNBP4                     | 165.32%   | 21.89% |
| SPRY1                     | 1627.47%  | 21.88% |
| IDH3B                     | 40.70%    | 21.88% |
| MMD                       | 42.32%    | 21.86% |
| PSMA2                     | 87.22%    | 21.85% |
| OR10J8P                   | 25.51%    | 21.82% |
| CHRNA6                    | 43.36%    | 21.81% |
| IL3                       | 48.74%    | 21.81% |
| C7orf51                   | 16.62%    | 21.79% |
| GBP4                      | 24.75%    | 21.79% |
| IPO13                     | 72.22%    | 21.78% |
| NCALD                     | 46.75%    | 21.76% |
| RP1-286D6.2               | 24.32%    | 21.74% |
| PREPL                     | 32.42%    | 21.71% |
| AC025279.6-2,AC106782.5-5 | 205.43%   | 21.71% |
| NUCB1                     | 22.36%    | 21.71% |
| C7orf34                   | 34.36%    | 21.70% |
| PAM                       | 525.02%   | 21.69% |
| LMX1B                     | 35.18%    | 21.66% |
| TGFBR3                    | 129.03%   | 21.65% |
| C12orf11                  | 41.62%    | 21.63% |
| NDUFV1                    | 16.57%    | 21.62% |
| NOVA2                     | 56.56%    | 21.58% |
| APEX1                     | 91.02%    | 21.58% |
| ARPP19                    | 367.49%   | 21.55% |
| ATP6VOA2                  | 43.89%    | 21.54% |

|                           |         |        |
|---------------------------|---------|--------|
| PABPC3,PDS5A,PABPCP5      | 256.55% | 21.54% |
| HNRPA2B1                  | 122.79% | 21.52% |
| GPR3                      | 99.67%  | 21.50% |
| AC093509.1,AC109456.3-1,A | 82.08%  | 21.47% |
| AC020698.4,AC103796.3,HSF | 267.51% | 21.46% |
| MTSS1                     | 28.23%  | 21.46% |
| ZNF212                    | 31.97%  | 21.43% |
| NLGN2                     | 40.23%  | 21.43% |
| KLHDC2                    | 253.05% | 21.42% |
| C19orf73                  | 16.92%  | 21.42% |
| ACTR3                     | 14.45%  | 21.40% |
| ZNF410                    | 73.07%  | 21.39% |
| COL24A1                   | 43.00%  | 21.38% |
| STK40                     | 15.69%  | 21.38% |
| PPP1R14C                  | 19.42%  | 21.36% |
| RP11-122G18.5             | 12.85%  | 21.34% |
| ANO8                      | 74.15%  | 21.33% |
| PSMB2                     | 25.06%  | 21.33% |
| DUSP18                    | 60.12%  | 21.32% |
| MMP24                     | 56.10%  | 21.32% |
| NCKAP1                    | 20.16%  | 21.31% |
| RP5-1061H20.3             | 11.26%  | 21.30% |
| AC003075.4                | 11.99%  | 21.30% |
| MMD2                      | 11.98%  | 21.28% |
| HM13                      | 242.86% | 21.26% |
| TMED6                     | 68.97%  | 21.26% |
| DCUN1D4                   | 120.51% | 21.26% |
| FGGY                      | 49.38%  | 21.24% |
| STX1A                     | 168.80% | 21.23% |
| AKIRIN2                   | 79.40%  | 21.23% |
| CTSL1                     | 26.70%  | 21.21% |
| AVPR2                     | 24.36%  | 21.20% |
| CDKN2C                    | 47.91%  | 21.19% |
| ALDH3B1                   | 17.83%  | 21.17% |
| DLL3                      | 60.64%  | 21.17% |
| RAB40B                    | 30.89%  | 21.12% |
| PRR15                     | 28.34%  | 21.10% |
| CLDN6,RP11-29H23.6        | 54.33%  | 21.10% |
| CAPZA1                    | 40.59%  | 21.07% |
| GRIN2A                    | 20.88%  | 21.04% |
| CYP4F3LP,AC140481.7,AC132 | 45.34%  | 21.04% |
| WDR35                     | 92.50%  | 20.96% |
| KLHDC4                    | 21.41%  | 20.96% |
| PCSK9                     | 13.25%  | 20.96% |
| ETNK1                     | 707.48% | 20.95% |
| BMP2K                     | 123.99% | 20.93% |
| COL14A1                   | 32.33%  | 20.92% |

|                           |          |        |
|---------------------------|----------|--------|
| P2RY6                     | 12.23%   | 20.91% |
| DACT3                     | 14.38%   | 20.91% |
| SHANK2                    | 34.82%   | 20.89% |
| CACNA1H                   | 14.81%   | 20.86% |
| GRID2IP                   | 38.97%   | 20.82% |
| KRTAP5-10                 | 79.60%   | 20.81% |
| LRRC8A                    | 41.66%   | 20.80% |
| PDHA1                     | 55.75%   | 20.80% |
| GPR42P,FFAR3              | 200.88%  | 20.79% |
| ATP1B3,AC012498.10-1      | 1998.65% | 20.73% |
| CELSR2                    | 109.53%  | 20.71% |
| KIAA0513                  | 65.72%   | 20.71% |
| NFRKB                     | 12.18%   | 20.68% |
| ZYX                       | 23.06%   | 20.66% |
| CASP2                     | 70.39%   | 20.66% |
| C1orf50                   | 31.67%   | 20.64% |
| C7orf10                   | 20.86%   | 20.64% |
| RP11-611D20.2             | 23.66%   | 20.62% |
| PIG-Y                     | 216.88%  | 20.61% |
| PIGG                      | 23.16%   | 20.60% |
| RP11-301J16.5             | 14.37%   | 20.57% |
| RAP2A                     | 28.89%   | 20.57% |
| TFR2                      | 16.86%   | 20.52% |
| ZNF24                     | 36.96%   | 20.51% |
| C14orf100                 | 164.17%  | 20.50% |
| RUNX1                     | 11.65%   | 20.50% |
| PITRM1                    | 36.99%   | 20.50% |
| SUSD4                     | 44.52%   | 20.49% |
| KCTD7,RP4-756H11.3        | 190.11%  | 20.48% |
| POLR3G                    | 100.18%  | 20.47% |
| RBM23                     | 78.48%   | 20.47% |
| RPS16P10                  | 66.93%   | 20.45% |
| GOLGA3                    | 49.14%   | 20.45% |
| AC093668.4-1,POLR2J2,POLR | 39.13%   | 20.40% |
| TMBIM4                    | 47.29%   | 20.39% |
| ACRV1                     | 21.45%   | 20.39% |
| AP000345.1                | 30.44%   | 20.37% |
| PROM1                     | 90.91%   | 20.36% |
| HECW2                     | 149.82%  | 20.35% |
| ZNF207                    | 63.32%   | 20.34% |
| SLC20A1                   | 187.14%  | 20.34% |
| SHOC2                     | 107.88%  | 20.33% |
| FCGBP                     | 17.53%   | 20.31% |
| PSMA5                     | 96.04%   | 20.28% |
| AP000344.1                | 14.34%   | 20.28% |
| PCCB                      | 44.77%   | 20.28% |
| ZIK1                      | 88.13%   | 20.27% |

|                          |         |        |
|--------------------------|---------|--------|
| JMJD1A                   | 21.27%  | 20.26% |
| ZNF621                   | 26.02%  | 20.26% |
| C2orf76                  | 309.44% | 20.25% |
| PHF19                    | 62.46%  | 20.25% |
| HAO2                     | 16.37%  | 20.25% |
| MPZ                      | 61.64%  | 20.24% |
| VPS24                    | 70.75%  | 20.22% |
| PDE4DIP                  | 22.84%  | 20.22% |
| CCHCR1,CCHCR1,CCHCR1,CCI | 11.45%  | 20.19% |
| AKIRIN2                  | 60.28%  | 20.17% |
| NKTR                     | 34.86%  | 20.13% |
| DNM1                     | 23.18%  | 20.12% |
| PKHD1                    | 41.67%  | 20.09% |
| TRNAU1AP                 | 18.40%  | 20.09% |
| FAM129C                  | 20.03%  | 20.08% |
| SETD5                    | 34.39%  | 20.07% |
| GDPD4                    | 23.98%  | 20.06% |
| CYP2A7                   | 28.65%  | 20.03% |
| AC019185.4,PTHR2         | 152.20% | 20.03% |



Values represent mast cell genes upregulated by at least 10% by FceRI stimulation that were upregulated (least inhibited) >20% by TGA (sorted most upregulated to least upregulated in column D)

| Gene_symbol                          | % Increase (-) to (+) | % Inhibition by TGA |
|--------------------------------------|-----------------------|---------------------|
| ELF1                                 | 13.55%                | -266.13%            |
| LAPTM4A                              | 104.32%               | -157.06%            |
| TRIO                                 | 145.13%               | -151.37%            |
| EVI2B                                | 262.93%               | -141.14%            |
| MYLK3                                | 24.60%                | -141.13%            |
| TMEM165                              | 158.48%               | -126.63%            |
| ARPC3                                | 113.65%               | -125.19%            |
| EIF3E                                | 251.53%               | -118.50%            |
| DONSON                               | 40.83%                | -116.78%            |
| ATP6V1G1                             | 100.58%               | -116.72%            |
| CRBN                                 | 40.96%                | -116.37%            |
| PDCD6                                | 106.13%               | -114.68%            |
| RP11-422P24.9,RPL34,RPL34P27         | 20.24%                | -114.65%            |
| RIOK2                                | 13.44%                | -112.18%            |
| AD000091.1,RPL23AP37,RP11-106        | 148.96%               | -111.90%            |
| HSPH1                                | 129.36%               | -109.31%            |
| CCNI                                 | 33.79%                | -105.85%            |
| RIPK2                                | 85.75%                | -104.23%            |
| CEP350                               | 141.35%               | -103.89%            |
| XRCC5                                | 108.83%               | -103.48%            |
| BRAF                                 | 120.20%               | -103.21%            |
| TPST2                                | 136.14%               | -102.05%            |
| BMI1                                 | 436.33%               | -100.65%            |
| PPP2CA                               | 133.03%               | -99.42%             |
| DUSP4                                | 500.23%               | -97.11%             |
| AC110926.4,WBP11P1,WBP11             | 41.33%                | -95.19%             |
| AC058791.1                           | 705.28%               | -94.33%             |
| SSH2,RP11-565J7.3,RPL21P68,RPL4      | 78.36%                | -93.84%             |
| CHD9                                 | 54.39%                | -92.42%             |
| AP002364.4-1,TUBA1B,TUBA1A,TLN1      | 124.51%               | -91.87%             |
| LITAF                                | 135.59%               | -90.52%             |
| LY96                                 | 27.54%                | -89.31%             |
| ZNF354A                              | 24.59%                | -89.11%             |
| RAB11FIP1                            | 313.82%               | -85.21%             |
| RP11-110C15.4,RPL4,RP11-87M1.1       | 13.29%                | -84.74%             |
| KIAA1644                             | 50.30%                | -84.36%             |
| COX17,RP11-189B4.3                   | 23.75%                | -83.60%             |
| VIM                                  | 32.60%                | -83.01%             |
| NUDT2                                | 21.69%                | -82.09%             |
| NTAN1                                | 24.83%                | -80.58%             |
| PMEP1                                | 76.53%                | -80.32%             |
| RP11-110C15.4,RPL4,RP11-87M1.1       | 27.13%                | -78.89%             |
| RPS4P16,RP11-550E22.3,VPS53,RP11-106 | 47.75%                | -77.95%             |
| MBNL1                                | 14.74%                | -77.28%             |

|                                |          |         |
|--------------------------------|----------|---------|
| FOS                            | 120.46%  | -76.86% |
| PPP2R5A                        | 53.15%   | -75.91% |
| THOC7                          | 45.89%   | -75.76% |
| IL1B                           | 31.22%   | -74.14% |
| ATP5G3                         | 122.79%  | -72.77% |
| TCEA1                          | 217.42%  | -71.82% |
| SSR1                           | 95.19%   | -71.56% |
| RGS5                           | 105.20%  | -71.50% |
| PTPN1                          | 80.50%   | -70.07% |
| NUDT5                          | 26.54%   | -69.51% |
| SF3B4                          | 21.79%   | -67.88% |
| JMJD1C                         | 234.59%  | -66.85% |
| NRIP3                          | 480.81%  | -66.61% |
| DCN                            | 23.50%   | -66.15% |
| CD44                           | 306.68%  | -66.09% |
| RAPGEF2                        | 112.46%  | -65.58% |
| HAT1                           | 47.03%   | -64.93% |
| LYST,RP5-1043F6.2              | 59.86%   | -64.78% |
| TNFSF10                        | 43.07%   | -64.25% |
| DONSON                         | 13.51%   | -64.22% |
| CHST11                         | 35.90%   | -63.50% |
| AK3                            | 65.63%   | -62.76% |
| ISOC1                          | 134.93%  | -62.71% |
| RGS1                           | 149.49%  | -61.98% |
| TNFAIP6                        | 75.79%   | -61.67% |
| GJB2                           | 17.86%   | -60.84% |
| hsa-mir-568                    | 62.85%   | -60.49% |
| H3F3AP1                        | 30.05%   | -60.32% |
| GNAI1                          | 465.23%  | -59.81% |
| UBE2K                          | 75.84%   | -59.75% |
| MOBK13                         | 105.06%  | -58.80% |
| C5orf32                        | 102.03%  | -58.78% |
| ECD                            | 43.04%   | -58.46% |
| HMG20A                         | 15.49%   | -58.09% |
| MS4A2                          | 616.17%  | -58.09% |
| C9orf9                         | 12.50%   | -57.58% |
| ZNFX1                          | 23.76%   | -56.80% |
| ABL2                           | 48.01%   | -56.59% |
| C6orf115                       | 271.18%  | -56.59% |
| F2RL2                          | 11.36%   | -56.04% |
| TRIO                           | 12.86%   | -55.91% |
| TOMM22                         | 22.35%   | -55.00% |
| LUC7L2                         | 59.09%   | -54.16% |
| FAM63B                         | 36.53%   | -54.13% |
| RPL23AP1,RPL23AP1,Z97634.3,RP1 | 38.57%   | -53.97% |
| CCL4L1,CCL4,CCL4L2             | 4653.85% | -53.94% |
| ITPRIP                         | 412.84%  | -53.67% |

|                                |          |         |
|--------------------------------|----------|---------|
| TTC14                          | 168.76%  | -53.47% |
| MYD88                          | 47.01%   | -52.88% |
| SKP1A                          | 43.64%   | -52.45% |
| PDPR                           | 24.23%   | -52.43% |
| ZMIZ1                          | 10.98%   | -52.21% |
| CLEC2B                         | 20.19%   | -51.77% |
| FOSL2                          | 46.04%   | -51.57% |
| PRCP                           | 40.61%   | -51.38% |
| GDF15,PGPEP1                   | 15.80%   | -51.36% |
| NONO,NOB1                      | 99.88%   | -51.35% |
| AC145285.2-2,AC092375.4-2,AC10 | 82.40%   | -50.90% |
| MLLT11                         | 102.09%  | -50.88% |
| KNTC1                          | 87.18%   | -50.68% |
| SEMA4A                         | 63.54%   | -50.48% |
| AC011295.3-4,AC012005.3,AC048: | 16.63%   | -50.09% |
| TUBB6                          | 76.15%   | -48.36% |
| NDUFA1                         | 53.35%   | -48.21% |
| PIAS1                          | 66.07%   | -48.18% |
| TBC1D24                        | 67.32%   | -47.99% |
| AC020571.3                     | 2126.91% | -47.99% |
| ARL4P,NSUN7,AC124914.3,ARL4A   | 45.60%   | -47.98% |
| STMN2                          | 16.58%   | -47.95% |
| ADIPOR1                        | 22.94%   | -47.88% |
| RP11-472G23.8,RP11-472G23.3,RF | 59.12%   | -47.86% |
| AZIN1                          | 58.84%   | -47.72% |
| VWA5A                          | 122.73%  | -47.54% |
| IARS                           | 66.95%   | -47.37% |
| PKN2                           | 38.70%   | -47.22% |
| TMEM181                        | 196.59%  | -47.05% |
| PTPLAD1                        | 342.73%  | -46.82% |
| GAPT                           | 205.68%  | -46.47% |
| TIAL1                          | 54.41%   | -46.13% |
| CALB2                          | 127.01%  | -46.12% |
| SET                            | 169.66%  | -45.95% |
| SYCP2L                         | 20.44%   | -45.47% |
| CSDA                           | 188.07%  | -45.36% |
| RP1-138A5.1,AC009812.17,RPSAP: | 20.48%   | -45.35% |
| AC010907.3,TMSL3,TMSB4X        | 36.55%   | -44.81% |
| RGS2                           | 62.75%   | -44.49% |
| TCEAL1                         | 165.30%  | -44.31% |
| TSC22D1                        | 313.87%  | -44.10% |
| C20orf30                       | 71.22%   | -44.05% |
| CYTH3                          | 452.57%  | -44.04% |
| AADAACL1                       | 130.95%  | -43.75% |
| RPS13P2                        | 19.69%   | -43.65% |
| ANKFY1                         | 28.50%   | -43.46% |
| AC104655.3                     | 55.57%   | -43.43% |

|                                 |           |         |
|---------------------------------|-----------|---------|
| OCIAD1                          | 109.53%   | -43.24% |
| TMEM77                          | 32.84%    | -42.82% |
| PSMD6                           | 82.95%    | -42.36% |
| ZNF403                          | 124.74%   | -42.17% |
| DDR2                            | 21.97%    | -42.03% |
| NUS1                            | 18.80%    | -41.92% |
| PSMB1                           | 32.00%    | -41.75% |
| NONO,NOB1                       | 101.02%   | -41.60% |
| C13orf23                        | 22.67%    | -41.44% |
| RP4-647M16.1,RP11-54O7.10,ACO   | 52.54%    | -40.57% |
| SNAP23                          | 32.07%    | -40.01% |
| AC116337.2-1,FGF14,Y_RNA,ZNF71  | 22.41%    | -40.00% |
| PTPRR                           | 564.54%   | -39.91% |
| ESD                             | 132.44%   | -39.62% |
| ELOVL5                          | 36.79%    | -39.58% |
| STK38                           | 67.46%    | -38.87% |
| KIR2DL2,KIR3DL3                 | 18.76%    | -38.75% |
| PLOD2                           | 57.32%    | -38.60% |
| PSMA1                           | 242.41%   | -38.28% |
| RB1CC1                          | 74.74%    | -38.28% |
| C15orf29                        | 10.62%    | -38.22% |
| BMI1,COMMD3                     | 14.50%    | -38.15% |
| GNL2                            | 15.33%    | -37.74% |
| CD79A                           | 12.34%    | -37.70% |
| PSMB7                           | 34.24%    | -37.62% |
| RC3H1                           | 34.69%    | -37.18% |
| CCL4L1,CCL4,CCL4L2              | 1998.72%  | -37.18% |
| FXR1                            | 27.92%    | -37.09% |
| ASNS                            | 79.70%    | -37.05% |
| SMARCA1                         | 14.53%    | -36.85% |
| EGR4                            | 31615.63% | -36.63% |
| RASSF5                          | 93.79%    | -36.49% |
| GPATCH2                         | 29.50%    | -36.35% |
| COX6C                           | 11.72%    | -36.27% |
| ZHX1                            | 41.66%    | -36.27% |
| HDC                             | 50.22%    | -36.18% |
| SH2B3                           | 93.27%    | -36.14% |
| C19orf12                        | 16.88%    | -36.13% |
| TRAF5                           | 141.46%   | -36.12% |
| RP11-565J7.3,AC087190.5-2,RPL21 | 104.01%   | -36.07% |
| SENP7                           | 31.90%    | -36.00% |
| VEZT                            | 91.07%    | -35.89% |
| CLDN12,GTPBP10                  | 13.12%    | -35.21% |
| ALS2                            | 76.72%    | -34.89% |
| SCOC                            | 307.28%   | -34.81% |
| GALC                            | 397.79%   | -34.79% |
| PDZD11                          | 43.51%    | -34.74% |

|                                |         |         |
|--------------------------------|---------|---------|
| SRGN                           | 739.39% | -34.61% |
| SEC24B                         | 176.30% | -34.45% |
| SASH1                          | 16.49%  | -34.38% |
| GFI1B                          | 38.65%  | -34.32% |
| VMA21                          | 28.45%  | -34.27% |
| VGLL4                          | 13.75%  | -33.92% |
| ZNF195                         | 49.84%  | -33.90% |
| MOAP1                          | 66.14%  | -33.90% |
| RAB2B                          | 46.17%  | -33.10% |
| PTPN2                          | 31.45%  | -32.97% |
| ELL2                           | 154.82% | -32.86% |
| UBE2D3P,UBE2D3                 | 163.29% | -32.84% |
| ATG12                          | 24.60%  | -32.64% |
| STX11                          | 166.50% | -32.55% |
| SVIL                           | 76.29%  | -32.36% |
| LRAP                           | 67.52%  | -32.20% |
| STX7                           | 28.81%  | -32.09% |
| FUNDC2                         | 76.17%  | -31.77% |
| GADD45A                        | 32.16%  | -31.60% |
| NT5DC1                         | 107.97% | -31.45% |
| MIS12                          | 49.10%  | -31.37% |
| FAM172A                        | 95.44%  | -31.29% |
| AL049778.3,CNIH                | 589.89% | -31.15% |
| RBM47                          | 42.19%  | -31.11% |
| SAT1                           | 321.25% | -31.09% |
| TXN                            | 96.50%  | -31.09% |
| MKLN1                          | 124.73% | -30.93% |
| PDE8A                          | 89.71%  | -30.62% |
| RHOBTB3                        | 123.89% | -30.31% |
| APLP2                          | 16.53%  | -30.11% |
| PUS3                           | 114.19% | -29.89% |
| IRAK2                          | 82.10%  | -29.78% |
| EGR3                           | 849.33% | -29.78% |
| C14orf43                       | 133.88% | -29.67% |
| COPEB                          | 300.63% | -29.49% |
| ARID2                          | 210.84% | -29.26% |
| ABCD3                          | 176.36% | -29.04% |
| BTF3,CTD-2090I13.4,AC021558.10 | 105.33% | -28.90% |
| AC090377.15-1,C17orf57,NFE2L3  | 193.75% | -28.69% |
| LETM2                          | 35.96%  | -28.34% |
| CBLB                           | 24.38%  | -28.17% |
| GBAS                           | 272.46% | -27.89% |
| APPBP2                         | 35.86%  | -27.79% |
| RP11-220D10.1,RP4-778K6.1,RPL3 | 49.19%  | -27.78% |
| NDUFAF1                        | 50.75%  | -27.70% |
| PRG2                           | 27.33%  | -27.66% |
| TRIM33                         | 40.52%  | -27.63% |

|                               |          |         |
|-------------------------------|----------|---------|
| DDHD2                         | 10.37%   | -27.62% |
| ZDHHC2                        | 152.80%  | -27.40% |
| FASTKD2                       | 19.54%   | -27.31% |
| INTS6                         | 40.99%   | -27.19% |
| FAM175A                       | 133.76%  | -27.17% |
| RAP1A                         | 76.67%   | -27.15% |
| AC005332.1                    | 79.89%   | -27.10% |
| GSTM3                         | 29.52%   | -27.03% |
| FOSL2                         | 60.55%   | -26.92% |
| GSK3B                         | 22.99%   | -26.91% |
| MMADHC                        | 617.86%  | -26.87% |
| SFRS3                         | 101.61%  | -26.75% |
| RSRC2                         | 125.93%  | -26.69% |
| CLASP2                        | 11.75%   | -26.32% |
| CCDC50                        | 94.78%   | -26.25% |
| AL009183.10                   | 161.76%  | -26.21% |
| PAK1                          | 357.63%  | -25.82% |
| MGST3                         | 36.59%   | -25.78% |
| SERPINA9                      | 15.80%   | -25.74% |
| GPRC5A                        | 103.29%  | -25.64% |
| UBE2Q2                        | 81.96%   | -25.63% |
| AC093081.2,RWDD4A             | 55.94%   | -25.55% |
| RRM2B                         | 93.41%   | -25.47% |
| GPR34                         | 471.20%  | -25.21% |
| GPBP1                         | 16.80%   | -25.14% |
| ANUBL1                        | 26.28%   | -25.13% |
| SMYD2                         | 14.72%   | -25.12% |
| ALS2CR12                      | 60.43%   | -25.11% |
| PCGF5                         | 156.81%  | -25.05% |
| LPHN1                         | 17.66%   | -25.00% |
| KCTD10                        | 19.87%   | -24.90% |
| RPS23                         | 132.85%  | -24.71% |
| DCDC1,RP11-235D19.3,CYCSP52,R | 241.88%  | -24.66% |
| TPM4                          | 127.75%  | -24.57% |
| NPL                           | 19.26%   | -24.44% |
| EIF4E                         | 5923.20% | -24.44% |
| C22orf28,BPIL2                | 55.65%   | -24.41% |
| TBL1XR1                       | 162.79%  | -24.40% |
| CALM2,RP11-367H5.5            | 357.15%  | -24.35% |
| HSD3B1,AL109966.1             | 20.97%   | -24.28% |
| LEO1                          | 295.00%  | -24.25% |
| ESCO1                         | 46.34%   | -23.94% |
| C6orf72                       | 62.82%   | -23.69% |
| CXCL16                        | 14.55%   | -23.66% |
| IDH3A                         | 23.09%   | -23.52% |
| KRCC1                         | 132.36%  | -23.33% |
| TSPYL2                        | 45.47%   | -23.32% |

|                                |          |         |
|--------------------------------|----------|---------|
| TMEM63B                        | 48.40%   | -23.31% |
| AGRN                           | 14.35%   | -23.29% |
| FGR                            | 31.62%   | -23.15% |
| EGR2                           | 1821.64% | -23.07% |
| EBAG9                          | 132.18%  | -23.05% |
| RP11-77G22.3,SDCBP             | 746.32%  | -23.01% |
| TLN2                           | 40.65%   | -22.90% |
| CENPC1,AC010201.18             | 230.00%  | -22.90% |
| PPP1R10,PPP1R10,PPP1R10,PPP1F  | 12.25%   | -22.90% |
| POLR2B                         | 104.15%  | -22.89% |
| YY1                            | 171.91%  | -22.85% |
| MTERFD1                        | 43.60%   | -22.70% |
| COPA                           | 143.72%  | -22.67% |
| AC005534.6,AC022431.1,RPL26P1: | 75.86%   | -22.56% |
| CHN2                           | 74.00%   | -22.27% |
| RP5-961K14.1,MYST2,AC009720.1' | 17.49%   | -22.17% |
| RANP1,RANP1,AC079789.1,RANP1   | 145.23%  | -22.08% |
| C7orf23                        | 118.97%  | -22.03% |
| OGT                            | 465.07%  | -21.99% |
| SAMD9L                         | 411.58%  | -21.91% |
| RPL37AP1,RPL37A                | 10.36%   | -21.84% |
| S100A10                        | 13.53%   | -21.82% |
| ARMC1                          | 195.99%  | -21.76% |
| CRISPLD2                       | 162.37%  | -21.74% |
| CCL3,CCL3L1,CCL3L1,TBC1D3C     | 229.34%  | -21.46% |
| ZNF542                         | 31.21%   | -21.11% |
| RPL7,AC011382.4-1,AC010601.6,R | 53.46%   | -21.04% |
| MAP4K4                         | 131.14%  | -20.85% |
| UQCRB,UQCRBP1                  | 27.38%   | -20.64% |
| MDM2                           | 362.11%  | -20.62% |
| CCDC59                         | 23.60%   | -20.60% |
| RPL23A,RPL23AP38,HSD17B12      | 65.42%   | -20.51% |
| CEP192                         | 56.16%   | -20.45% |
| RP11-396K3.1,GTF2I             | 25.39%   | -20.44% |
| TFG                            | 291.70%  | -20.39% |
| RPL34                          | 153.30%  | -20.30% |
| RP4-761I2.3                    | 91.88%   | -20.19% |
| MITD1                          | 130.90%  | -20.14% |
| VAC14                          | 2154.36% | -20.07% |
| SAP18,AC013733.5               | 57.68%   | -20.01% |
