# Supplementary material
Source: PubMed Central journal article supplement (PMC5350695)

Supplementary Figure 1:

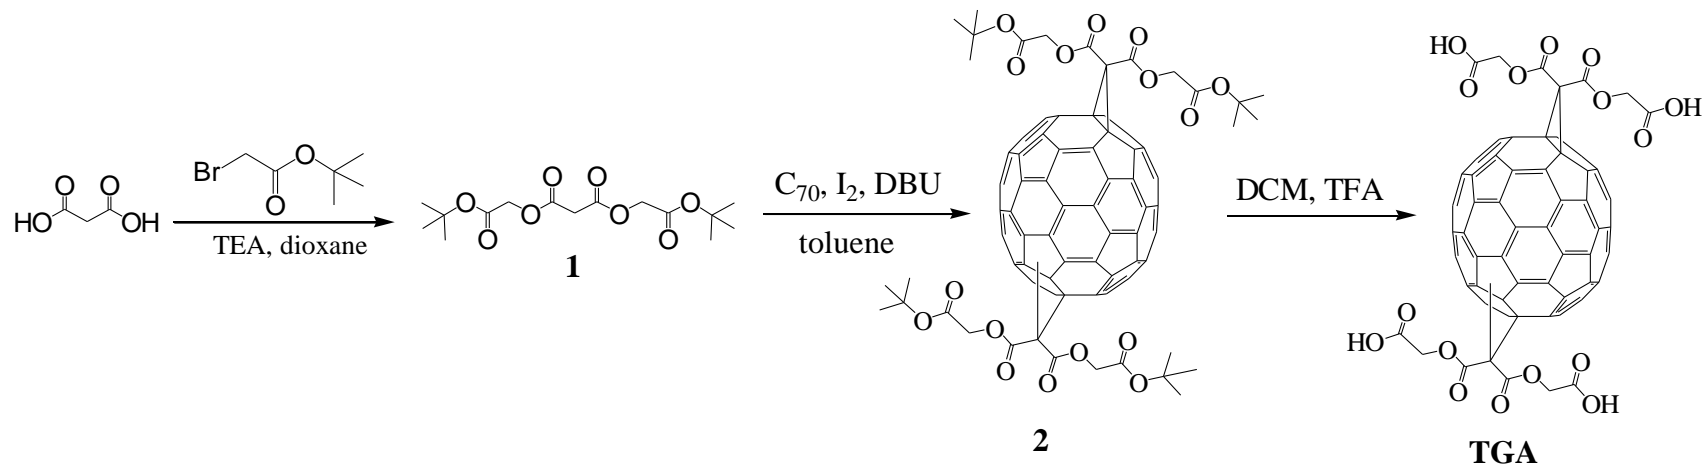

Supplement: CTS-3-158-s002.pdf [file CTS-3-158-s002.pdf]

Supplementary Figure 3:

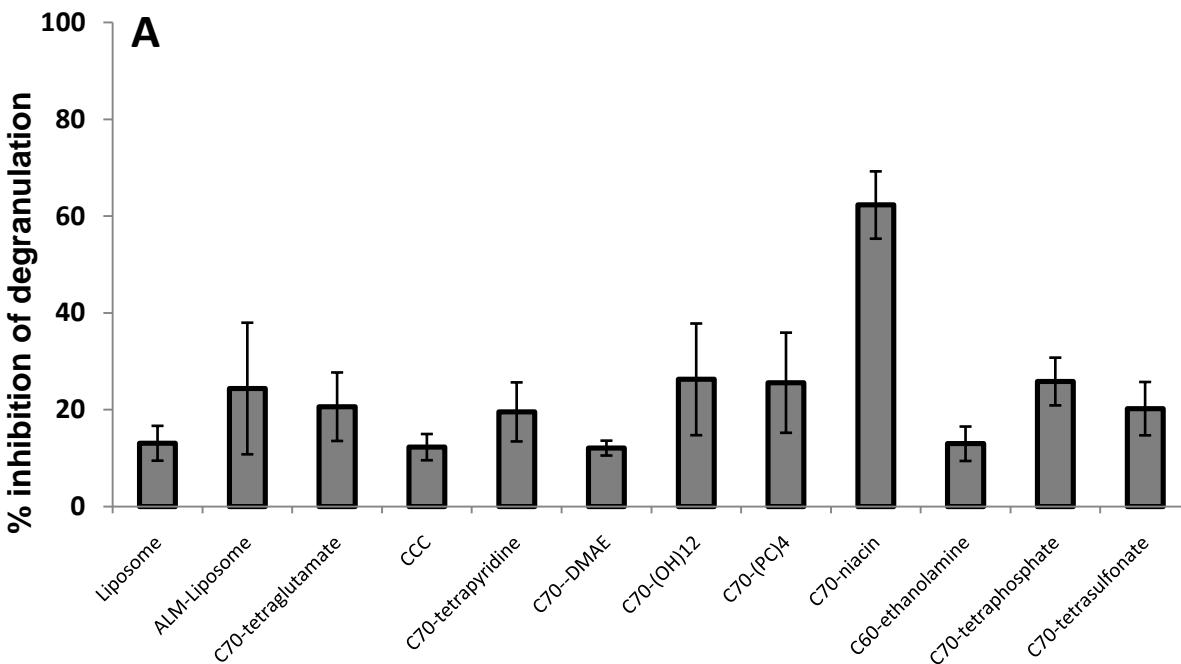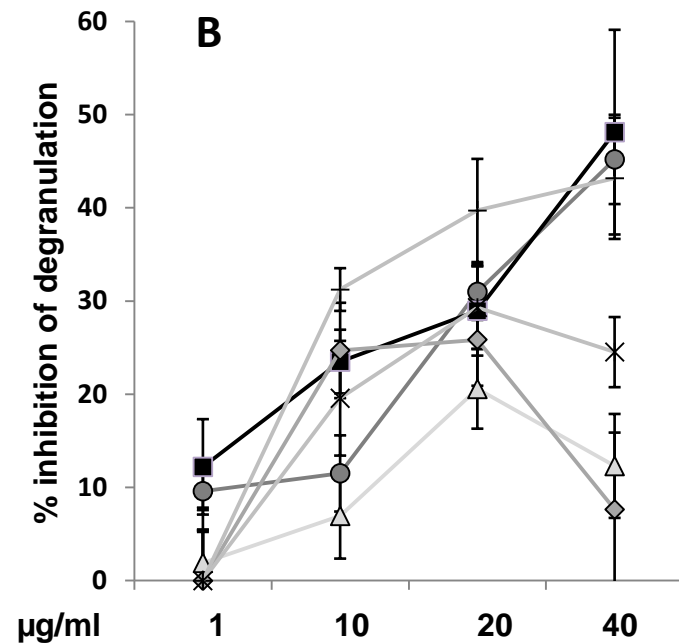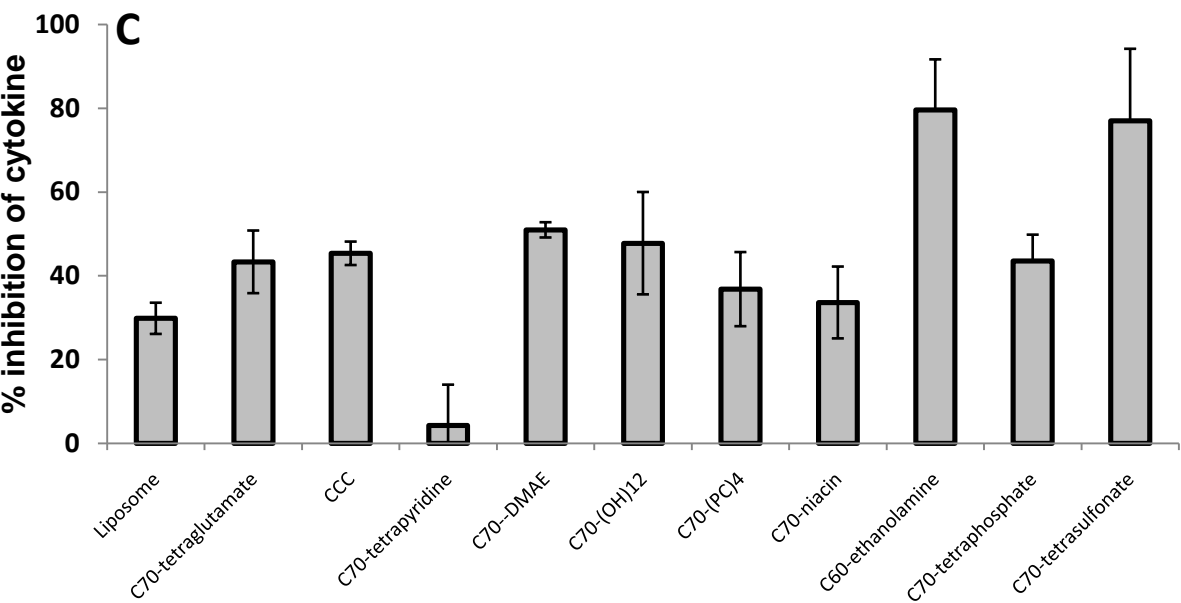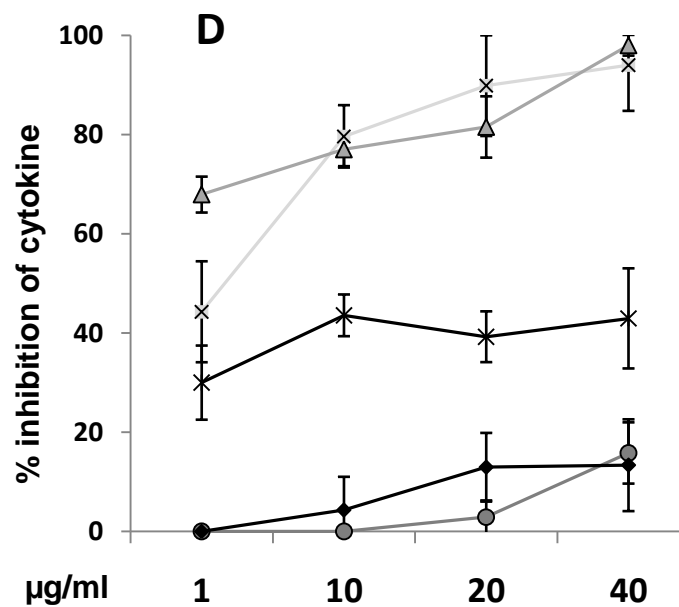

Supplement: CTS-3-158-s004.pdf [file CTS-3-158-s004.pdf]
